# Supplementary material for: Comparative Efficacy and Safety of Antidiabetic Drug Regimens Added to Metformin Monotherapy in Patients with Type 2 Diabetes: A Network Meta-Analysis
Source: PubMed Central journal article supplement (PMC4412636; doi:10.1371/journal.pone.0125879), 2015-04-28

Figure S1. Guide for Determining Statistical Significance and Clinical Superiority

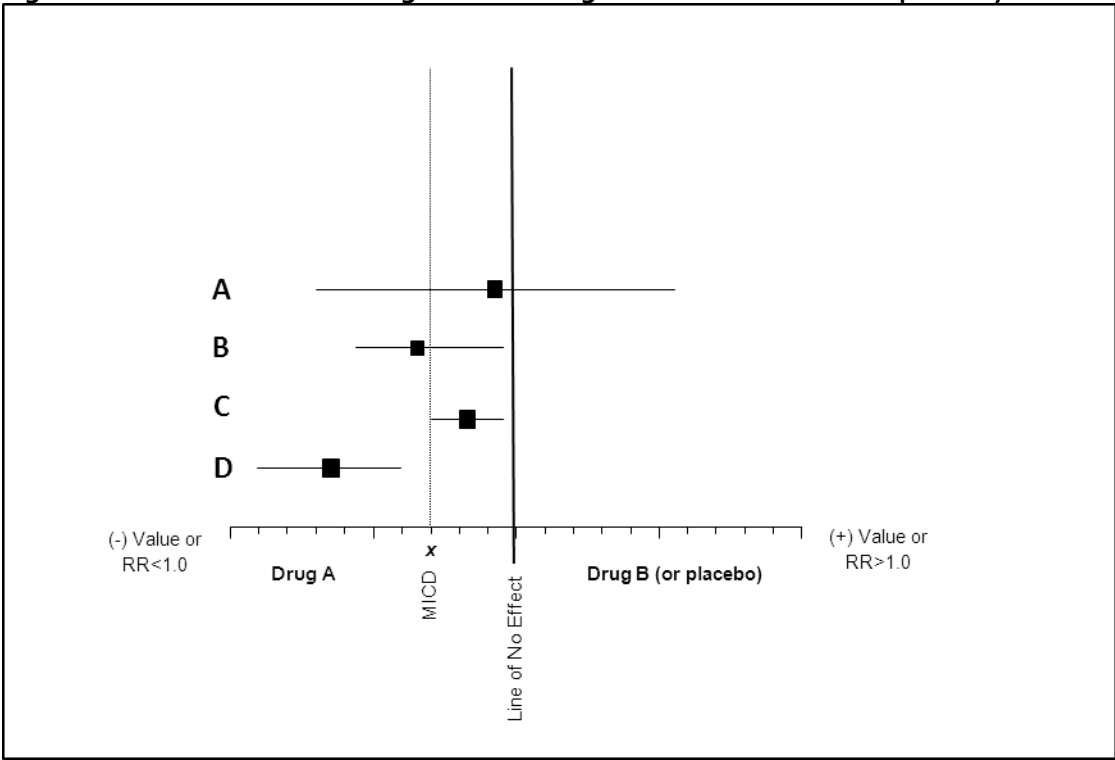

Supplement: pone.0125879.s004.pdf [file pone.0125879.s004.pdf]
