# Supplementary material for: Comparative Efficacy and Safety of Antidiabetic Drug Regimens Added to Metformin Monotherapy in Patients with Type 2 Diabetes: A Network Meta-Analysis
Source: PubMed Central journal article supplement (PMC4412636; doi:10.1371/journal.pone.0125879), 2015-04-28
Supplement: pone.0125879.s005.pdf [file pone.0125879.s005.pdf]

Figure S2. Risk of Bias Assessment of Randomized Controlled Trials

|                       | Random sequence generation | Allocation concealment | Blinding of participants and personnel | Blinding of outcomes assessment | Incomplete outcome data | Selective reporting | Other bias |
|-----------------------|----------------------------|------------------------|----------------------------------------|---------------------------------|-------------------------|---------------------|------------|
| DeFronzo 2014         | ?                          | ?                      | ?                                      | ?                               | +                       | +                   | -          |
| Bolli 2014            | ?                          | ?                      | +                                      | ?                               | ?                       | +                   | +          |
| Derosa 2014           | +                          | +                      | +                                      | ?                               | -                       | -                   | ?          |
| Haring 2014           | +                          | +                      | ?                                      | ?                               | +                       | +                   | +          |
| Nauck 2014            | ?                          | ?                      | +                                      | ?                               | +                       | -                   | -          |
| Ridderstrale 2014     | +                          | +                      | +                                      | ?                               | -                       | +                   | +          |
| White 2014            | +                          | +                      | +                                      | ?                               | +                       | +                   | -          |
| Charbonnel 2013       | +                          | +                      | -                                      | ?                               | ?                       | +                   | +          |
| Chawla 2013           | +                          | ?                      | ?                                      | ?                               | -                       | -                   | -          |
| Cefalu 2013           | +                          | +                      | +                                      | +                               | +                       | +                   | -          |
| Derosa 2013           | +                          | +                      | +                                      | ?                               | ?                       | +                   | +          |
| Lavalle-Gonzalez 2013 | +                          | +                      | +                                      | +                               | +                       | +                   | -          |
| Rosenstock 2013       | +                          | +                      | +                                      | ?                               | +                       | +                   | -          |
| Rosenstock 2013b      | ?                          | +                      | -                                      | ?                               | +                       | +                   | +          |
| Aschner 2012          | +                          | +                      | -                                      | ?                               | ?                       | +                   | -          |
| Bergenstal 2012       | +                          | +                      | ?                                      | +                               | -                       | -                   | +          |
| DeFronzo 2012         | ?                          | ?                      | +                                      | ?                               | -                       | -                   | -          |
| Derosa 2012           | ?                          | +                      | +                                      | ?                               | +                       | +                   | +          |
| Derosa 2012b          | ?                          | +                      | +                                      | ?                               | +                       | -                   | +          |
| Gallwitz 2012         | +                          | +                      | -                                      | ?                               | -                       | +                   | ?          |
| Gallwitz 2012b        | +                          | +                      | +                                      | +                               | -                       | +                   | -          |
| Ljunggren 2012        | +                          | +                      | +                                      | +                               | +                       | +                   | +          |
| Pan 2012              | ?                          | ?                      | ?                                      | ?                               | +                       | +                   | -          |
| Rizzo 2012            | ?                          | ?                      | -                                      | +                               | +                       | -                   | -          |
| Rosenstock 2012       | ?                          | ?                      | ?                                      | ?                               | +                       | +                   | +          |
| Ross 2012             | +                          | +                      | +                                      | +                               | +                       | +                   | +          |
| Arechavaleta 2011     | +                          | +                      | +                                      | ?                               | +                       | +                   | +          |
| Nauck 2011            | +                          | +                      | +                                      | ?                               | -                       | +                   | -          |
| Pfützner 2011         | ?                          | ?                      | ?                                      | ?                               | +                       | +                   | +          |
| Taskinen 2011         | ?                          | ?                      | ?                                      | ?                               | +                       | +                   | +          |
| Wang 2011             | +                          | -                      | -                                      | ?                               | ?                       | -                   | -          |
| Yang 2011             | +                          | ?                      | +                                      | ?                               | +                       | +                   | -          |
| Bailey 2010           | +                          | +                      | +                                      | +                               | +                       | +                   | -          |
| Filozof 2010          | ?                          | ?                      | +                                      | ?                               | +                       | -                   | -          |
| Goke 2010             | +                          | +                      | +                                      | ?                               | -                       | +                   | -          |
| Pratley 2010          | +                          | +                      | -                                      | +                               | -                       | +                   | +          |
| Rigby 2010            | ?                          | ?                      | -                                      | ?                               | -                       | -                   | -          |
| Scheen 2010           | ?                          | ?                      | +                                      | ?                               | +                       | +                   | -          |
| DeFronzo 2009         | +                          | +                      | +                                      | ?                               | -                       | +                   | -          |
| Ferrannini 2009       | ?                          | ?                      | +                                      | ?                               | -                       | +                   | -          |
| Goodman 2009          | ?                          | ?                      | ?                                      | ?                               | +                       | +                   | +          |
| Nauck 2009            | +                          | +                      | ?                                      | ?                               | -                       | +                   | +          |
| Nauck 2009b           | +                          | +                      | +                                      | ?                               | -                       | +                   | +          |
| Hamann 2008           | +                          | +                      | +                                      | ?                               | -                       | +                   | +          |
| Khanolkar 2008        | ?                          | ?                      | -                                      | ?                               | +                       | -                   | -          |
| Raz 2008              | +                          | ?                      | ?                                      | ?                               | +                       | +                   | -          |
| Scott 2008            | ?                          | ?                      | ?                                      | ?                               | +                       | +                   | -          |

|                  |   |   |   |   |   |   |   |
|------------------|---|---|---|---|---|---|---|
| Bosi 2007        | ? | ? | ? | ? | + | + | - |
| Nauck 2007       | ? | ? | ? | ? | + | + | - |
| Ristic 2006      | + | + | + | ? | + | + | - |
| DeFronzo 2005    | ? | ? | + | ? | + | + | + |
| Feinglos 2005    | ? | ? | ? | ? | + | + | + |
| Matthews 2005    | ? | ? | + | ? | + | + | + |
| Ahren 2004       | ? | ? | ? | ? | + | + | + |
| Gomez-Perez 2002 | ? | ? | ? | ? | - | + | - |
| Marre 2002       | + | + | + | ? | + | + | - |
| Charpentier 2001 | + | + | + | ? | + | + | - |
| Van 2001         | + | ? | + | ? | - | + | + |
| Halimi 2000      | ? | ? | ? | ? | + | - | - |
| Fonseca 2000     | + | ? | + | + | + | + | - |
| Moses 1999       | ? | ? | ? | ? | + | + | + |
| Rosenstock 1998  | ? | ? | ? | ? | - | + | + |
