# Supplementary material for: Comparative Efficacy and Safety of Antidiabetic Drug Regimens Added to Metformin Monotherapy in Patients with Type 2 Diabetes: A Network Meta-Analysis
Source: PubMed Central journal article supplement (PMC4412636; doi:10.1371/journal.pone.0125879), 2015-04-28
Supplement: pone.0125879.s007.pdf [file pone.0125879.s007.pdf]

Figure S4. Network Meta-Analysis Results of the Effect of Antidiabetic Therapies on Change in Body Weight From Baseline

|                         |                         |                         |                        |                         |                        |                            |                        |                         |                         |                         |                         |                         |                         |                         |                        |                         |                         |                         |                         |                         |                         |                         |                         |                         |                         |
|-------------------------|-------------------------|-------------------------|------------------------|-------------------------|------------------------|----------------------------|------------------------|-------------------------|-------------------------|-------------------------|-------------------------|-------------------------|-------------------------|-------------------------|------------------------|-------------------------|-------------------------|-------------------------|-------------------------|-------------------------|-------------------------|-------------------------|-------------------------|-------------------------|-------------------------|
| ACA<br>(-1.15, 3.83)    | -2.49<br>(-3.83, -1.15) | -0.19<br>(-1.42, 1.03)  | 2.05<br>(0.9, 3.21)    | -0.99<br>(-2.45, 0.46)  | 2.07<br>(0.87, 3.28)   | 1.97<br>(0.6, 3.34)        | 1.98<br>(0.84, 3.11)   | 2.16<br>(0.79, 3.53)    | -2.3<br>(-3.7, -0.9)    | -1.29<br>(-2.61, 0.03)  | -2.29<br>(-3.39, -1.18) | -2.54<br>(-3.73, -1.35) | -1.83<br>(-3.23, -0.43) | -0.06<br>(-1.26, 1.14)  | 1.5<br>(0.33, 2.67)    | 1.05<br>(-0.33, 2.43)   | 1.7<br>(0.12, 3.28)     | -0.7<br>(-2.02, 0.62)   | -2.16<br>(-3.45, -0.87) | -0.1<br>(-1.15, 0.95)   | -3.37<br>(-5.23, -1.51) | -2.25<br>(-3.42, -1.09) | -0.16<br>(-1.33, 1.0)   | -0.31<br>(-1.41, 0.78)  | -0.14<br>(-1.26, 0.99)  |
| 2.49<br>(1.15, 3.83)    | ALOPIO<br>(1.48, 3.11)  | 2.3<br>(3.59, 5.5)      | 4.54<br>(3.59, 5.5)    | 1.5<br>(0.19, 2.8)      | 4.56<br>(3.54, 5.59)   | 4.46<br>(3.26, 5.67)       | 4.46<br>(3.53, 5.4)    | 4.65<br>(3.43, 5.87)    | 0.19<br>(-1.75, 2.13)   | 1.2<br>(0.05, 2.35)     | 0.2<br>(-0.67, 1.08)    | -0.06<br>(-0.59, 1.9)   | 0.66<br>(1.43, 3.43)    | 2.43<br>(3.02, 4.96)    | 3.99<br>(3.02, 4.77)   | 3.54<br>(2.32, 4.77)    | 4.19<br>(2.75, 5.63)    | 1.79<br>(0.63, 2.95)    | 0.33<br>(-0.46, 1.13)   | 2.39<br>(1.55, 3.23)    | -0.88<br>(-2.63, 0.87)  | 0.24<br>(-0.74, 1.21)   | 2.33<br>(1.35, 3.3)     | 2.18<br>(1.29, 3.06)    | 2.35<br>(1.43, 3.27)    |
| 0.19<br>(-1.03, 1.42)   | -2.3<br>(-3.11, -1.48)  | ALO<br>(1.46, 3.03)     | 2.25<br>(1.98, 0.38)   | -0.8<br>(1.4, 3.14)     | 2.27<br>(1.09, 3.24)   | 2.17<br>(1.41, 2.93)       | 2.17<br>(1.27, 3.44)   | 2.35<br>(3.96, -0.25)   | -2.11<br>(-2.11, -0.08) | -1.1<br>(-2.79, -1.4)   | -2.1<br>(-3.18, -1.51)  | -1.64<br>(-2.76, -0.52) | 0.13<br>(-0.71, 0.98)   | 1.69<br>(0.89, 2.5)     | 1.25<br>(0.15, 2.34)   | 1.5<br>(0.56, 3.23)     | 1.53<br>(-1.53, 0.51)   | -0.51<br>(-2.75, -1.19) | -1.97<br>(-0.53, 0.72)  | -3.18<br>(-4.84, -1.52) | -2.06<br>(-2.86, -1.26) | 0.03<br>(-0.77, 0.84)   | 0.03<br>(-0.82, 0.58)   | -0.12<br>(-0.69, 0.8)   | 0.06<br>(-0.29, 1.92)   |
| -2.05<br>(-3.21, -0.9)  | -4.54<br>(-5.5, -3.59)  | -2.25<br>(-3.03, -1.46) | CANA<br>(-4.12, -2.97) | -3.05<br>(-0.74, 0.78)  | 0.02<br>(-1.05, 0.88)  | 0.08<br>(-0.69, 0.53)      | -0.08<br>(-0.9, 1.12)  | 0.11<br>(-6.16, -2.54)  | -3.34<br>(-4.26, -2.43) | -4.34<br>(-4.84, -3.84) | -4.59<br>(-5.31, -3.87) | -3.89<br>(-4.89, -2.88) | -2.11<br>(-2.82, -1.4)  | -0.55<br>(-1.2, 0.09)   | -1.0<br>(-2.02, 0.02)  | -0.35<br>(-1.62, 0.92)  | -2.75<br>(-3.69, -1.82) | -4.21<br>(-5.08, -3.34) | -2.15<br>(-2.63, -1.67) | -5.42<br>(-7.03, -3.81) | -4.31<br>(-4.97, -3.64) | -2.21<br>(-2.91, -1.52) | -2.37<br>(-2.85, -1.88) | -2.19<br>(-2.79, -1.59) |                         |
| 0.99<br>(-0.46, 2.45)   | -1.5<br>(-2.8, -0.19)   | 0.8<br>(-0.38, 1.98)    | 3.05<br>(1.97, 4.12)   | COL<br>(1.9, 4.23)      | 3.07<br>(1.64, 4.29)   | 2.97<br>(1.64, 4.29)       | 2.97<br>(1.89, 4.05)   | 3.45<br>(1.81, 4.49)    | -1.31<br>(-3.32, 0.71)  | -0.3<br>(-1.54, 0.94)   | -1.3<br>(-2.33, -0.26)  | -1.54<br>(-2.67, -0.41) | -0.84<br>(-1.25, 0.47)  | 0.93<br>(1.44, 3.58)    | 2.49<br>(0.7, 3.39)    | 2.05<br>(1.69, 4.24)    | 2.69<br>(-0.99, 1.58)   | 0.29<br>(-2.47, 1.07)   | 0.89<br>(-0.11, 1.9)    | -4.21<br>(-4.21, -0.54) | -1.26<br>(-2.29, -0.24) | 0.83<br>(-0.29, 1.95)   | 0.68<br>(-0.3, 1.66)    | 0.86<br>(-0.3, 1.66)    | 0.86<br>(-0.3, 1.66)    |
| -2.07<br>(-3.28, -0.87) | -4.56<br>(-5.59, -3.54) | -2.27<br>(-3.14, -1.4)  | -0.02<br>(-0.78, 0.74) | -3.07<br>(-4.23, -1.9)  | DAPA<br>(-1.17, 0.96)  | -0.1<br>(-0.84, 0.64)      | -0.1<br>(-0.98, 1.16)  | 0.09<br>(-6.22, -2.53)  | -4.37<br>(-4.35, -2.37) | -3.37<br>(-5.05, -3.67) | -4.36<br>(-4.84, -3.98) | -4.61<br>(-5.0, -2.81)  | -3.91<br>(-2.96, -1.3)  | -2.13<br>(-1.36, 0.21)  | -0.57<br>(-2.1, 0.06)  | -1.02<br>(-1.69, 0.95)  | -0.37<br>(-3.78, -1.77) | -2.77<br>(-5.2, -3.27)  | -4.24<br>(-2.78, -1.57) | -2.17<br>(-7.09, -3.79) | -5.44<br>(-5.11, -3.55) | -4.33<br>(-2.96, -1.51) | -2.24<br>(-2.85, -1.73) | -2.39<br>(-3.05, -1.73) | -2.21<br>(-2.93, -1.49) |
| -1.97<br>(-3.34, -0.6)  | -4.46<br>(-5.67, -3.26) | -2.17<br>(-3.24, -1.09) | 0.08<br>(-0.89, 1.05)  | -2.97<br>(-4.29, 1.64)  | 0.1<br>(-0.96, 1.17)   | EMPA/LINA<br>(-0.82, 0.82) | 0.0<br>(-1.06, 1.44)   | 0.19<br>(6.23, -2.32)   | -4.27<br>(4.44, -2.09)  | -4.26<br>(-5.14, -3.38) | -4.26<br>(-5.55, -3.47) | -3.8<br>(-5.07, -2.54)  | -2.03<br>(-2.89, -1.17) | 0.41<br>(-1.46, 0.52)   | -0.92<br>(-2.18, 0.34) | -0.27<br>(-1.74, 1.2)   | -2.67<br>(-3.86, -1.48) | -2.67<br>(-5.27, -3.0)  | -2.07<br>(-2.95, -1.19) | -5.34<br>(-7.11, -3.57) | -4.23<br>(-5.23, -3.22) | -2.13<br>(-3.15, -1.12) | -2.28<br>(-3.19, -1.38) | -2.11<br>(-3.06, -1.16) | -2.11<br>(-3.06, -1.16) |
| -1.98<br>(-3.11, -0.84) | -4.46<br>(-5.4, -3.53)  | -2.17<br>(-2.93, -1.41) | 0.08<br>(-0.53, 0.69)  | -2.97<br>(-4.05, -1.89) | 0.1<br>(-0.82, 0.82)   | EMPA<br>(-0.81, 1.18)      | 0.19<br>(-6.08, -2.47) | -4.28<br>(-4.16, -2.37) | -3.17<br>(-4.72, -3.84) | -4.26<br>(-5.21, -3.81) | -4.51<br>(-4.84, -2.8)  | -3.81<br>(-2.64, -1.43) | -2.03<br>(-1.11, 0.16)  | -0.47<br>(-1.92, 0.08)  | -0.92<br>(-1.53, 0.28) | -2.68<br>(-3.59, -1.76) | -4.44<br>(-4.98, -3.29) | -2.08<br>(-2.52, -1.63) | -5.35<br>(-6.94, -3.75) | -4.23<br>(-4.88, -3.58) | -2.14<br>(-2.81, -1.47) | -2.29<br>(-2.78, -1.8)  | -2.29<br>(-2.68, -1.54) | -2.11<br>(-2.78, -1.8)  | -2.11<br>(-2.68, -1.54) |
| -2.16<br>(-3.53, -0.79) | -4.65<br>(-5.87, -3.43) | -2.35<br>(-3.44, -1.27) | -0.11<br>(-1.12, 0.9)  | -3.15<br>(-4.49, -1.81) | -0.09<br>(-1.44, 1.06) | -0.19<br>(-1.18, 0.81)     | EXEN<br>(-6.42, -2.5)  | -3.45<br>(-4.65, -2.26) | -4.65<br>(-5.4, -3.5)   | -4.7<br>(-5.75, -3.65)  | -3.99<br>(-5.28, -2.71) | -2.22<br>(-3.28, -1.16) | -0.66<br>(-1.69, 0.37)  | -1.11<br>(-1.9, 0.31)   | -0.46<br>(-1.06, 0.14) | -2.86<br>(-4.06, -1.66) | -3.32<br>(-5.48, -3.16) | -2.26<br>(-3.15, -1.37) | -5.53<br>(-7.3, -3.76)  | -4.41<br>(-5.43, -3.4)  | -3.32<br>(-3.34, -1.3)  | -2.47<br>(-3.44, -1.53) | -2.3<br>(-3.27, -1.32)  | -2.3<br>(-3.27, -1.32)  | -2.3<br>(-3.27, -1.32)  |
| 2.3<br>(0.9, 3.7)       | -0.19<br>(-2.13, 1.75)  | 2.11<br>(0.25, 3.96)    | 4.35<br>(2.54, 6.16)   | 1.31<br>(-0.71, 3.32)   | 4.37<br>(2.53, 6.22)   | 4.27<br>(2.32, 6.23)       | 4.28<br>(2.47, 6.08)   | 4.46<br>(2.5, 6.42)     | GLIB<br>(-0.91, 2.93)   | 1.01<br>(-0.91, 2.93)   | 0.01<br>(-1.77, 1.79)   | -0.14<br>(-2.07, 1.6)   | 0.47<br>(-1.51, 2.45)   | 2.24<br>(0.4, 4.08)     | 3.8<br>(1.98, 5.62)    | 3.35<br>(1.39, 5.32)    | 4.0<br>(1.9, 6.1)       | 1.6<br>(-0.32, 3.52)    | 0.14<br>(-1.76, 2.04)   | 2.2<br>(0.45, 3.95)     | -1.07<br>(-3.4, 1.26)   | 0.05<br>(-1.77, 1.86)   | 2.14<br>(0.32, 3.96)    | 1.99<br>(0.21, 3.76)    | 2.16<br>(0.37, 3.96)    |
| 1.29<br>(-0.03, 2.61)   | -1.2<br>(-2.35, -0.05)  | 1.1<br>(0.08, 2.13)     | 3.34<br>(2.43, 2.6)    | 0.3<br>(-0.94, 1.54)    | 3.37<br>(2.37, 4.36)   | 3.27<br>(2.09, 4.44)       | 3.27<br>(2.37, 4.16)   | 3.45<br>(2.26, 4.65)    | -1.01<br>(-2.93, 0.91)  | GLIC<br>(-1.84, -0.16)  | -1.0<br>(-2.21, -0.28)  | -0.54<br>(-1.75, 0.67)  | 1.23<br>(0.26, 2.2)     | 2.79<br>(1.86, 3.72)    | 2.35<br>(1.14, 3.55)   | 2.99<br>(1.57, 4.41)    | 0.59<br>(-0.54, 1.72)   | 1.19<br>(-1.96, 0.12)   | 2.08<br>(0.39, 1.99)    | -2.08<br>(-3.81, -0.35) | -0.96<br>(-1.75, -0.17) | 1.13<br>(0.19, 2.07)    | 1.13<br>(0.15, 1.81)    | 1.15<br>(0.37, 1.94)    | 1.15<br>(0.37, 1.94)    |
| 2.29<br>(1.18, 3.39)    | -0.2<br>(-1.08, 0.67)   | 2.1<br>(1.4, 2.79)      | 4.34<br>(3.84, 4.84)   | 1.3<br>(0.26, 2.33)     | 4.36<br>(3.67, 5.05)   | 4.26<br>(3.38, 5.14)       | 4.26<br>(3.81, 4.72)   | 4.54<br>(3.5, 5.4)      | -0.01<br>(-1.79, 1.77)  | 1<br>(0.16, 1.84)       | GLIM<br>(-0.89, 0.39)   | 0.46<br>(-0.5, 1.41)    | 2.23<br>(1.68, 2.78)    | 3.79<br>(3.26, 4.32)    | 3.34<br>(2.38, 4.3)    | 3.99<br>(2.76, 5.22)    | 1.59<br>(0.71, 2.46)    | 0.13<br>(-0.64, 0.9)    | 2.19<br>(1.84, 2.54)    | -1.08<br>(-2.66, 0.49)  | 0.03<br>(-0.55, 0.62)   | 2.13<br>(1.52, 2.74)    | 1.98<br>(1.59, 2.36)    | 2.15<br>(1.59, 2.61)    | 2.15<br>(1.59, 2.61)    |
| 2.54<br>(1.35, 3.73)    | 0.05<br>(-0.96, 1.05)   | 2.34<br>(1.51, 3.18)    | 4.59<br>(3.98, 5.31)   | 1.54<br>(0.41, 2.67)    | 4.61<br>(3.47, 5.51)   | 4.51<br>(3.81, 5.21)       | 4.51<br>(3.65, 5.7)    | 4.7<br>(3.5, 5.4)       | 0.24<br>(-1.6, 2.07)    | 1.25<br>(0.28, 2.21)    | 0.25<br>(-0.39, 0.89)   | GLIP<br>(-0.35, 1.76)   | 0.71<br>(2.48, 3.27)    | 4.04<br>(3.3, 4.78)     | 3.59<br>(2.54, 4.65)   | 4.24<br>(2.94, 5.24)    | 1.84<br>(0.86, 2.81)    | 0.38<br>(-0.56, 1.31)   | 2.44<br>(1.88, 3.0)     | -0.83<br>(-2.47, 0.8)   | 0.28<br>(-0.45, 1.02)   | 2.38<br>(1.63, 2.98)    | 2.23<br>(1.63, 2.82)    | 2.4<br>(1.72, 3.08)     | 2.4<br>(1.72, 3.08)     |
| 1.83<br>(0.43, 3.23)    | -0.66<br>(-1.9, 0.59)   | 1.64<br>(0.52, 2.76)    | 3.89<br>(2.88, 4.89)   | 0.84<br>(-0.47, 2.15)   | 3.91<br>(2.81, 5)      | 3.8<br>(2.54, 5.07)        | 3.81<br>(2.8, 4.81)    | 3.99<br>(2.71, 5.28)    | -0.47<br>(-2.45, 1.51)  | 0.54<br>(-0.67, 1.75)   | -0.46<br>(-1.41, 0.5)   | -0.71<br>(-1.76, 0.35)  | GLAR<br>(0.7, 2.85)     | 3.33<br>(2.33, 4.34)    | 2.89<br>(1.59, 4.18)   | 3.53<br>(2.03, 5.03)    | 1.13<br>(-0.1, 2.36)    | -0.33<br>(-1.51, 0.86)  | 1.73<br>(0.8, 2.66)     | -1.54<br>(-3.33, 0.26)  | -0.42<br>(-1.44, 0.6)   | 1.67<br>(0.62, 2.72)    | 1.52<br>(0.64, 2.4)     | 1.69<br>(0.69, 2.7)     | 1.69<br>(0.69, 2.7)     |
| 0.06<br>(-1.14, 1.26)   | -2.43<br>(-3.43, -1.43) | -0.13<br>(-0.98, 0.71)  | 2.11<br>(1.4, 2.82)    | -0.93<br>(-2.08, 0.21)  | 2.13<br>(1.3, 2.96)    | 2.03<br>(1.17, 2.89)       | 2.22<br>(1.43, 2.64)   | 2.22<br>(1.16, 3.28)    | -2.24<br>(-4.08, -0.4)  | -1.23<br>(-2.2, -0.26)  | -2.23<br>(-2.78, -1.68) | -2.48<br>(-3.27, -1.68) | -1.77<br>(-2.85, -0.7)  | LINA<br>(0.83, 2.29)    | 1.56<br>(0.05, 2.18)   | 1.11<br>(0.45, 3.07)    | 1.76<br>(-1.63, 0.35)   | -0.64<br>(-3.02, -1.19) | -0.04<br>(-0.62, 0.54)  | -3.11<br>(-4.95, -1.67) | -2.2<br>(-2.95, -1.44)  | -0.1<br>(-0.87, 0.66)   | -0.25<br>(-0.87, 0.37)  | -0.08<br>(-0.75, 0.59)  | -0.08<br>(-0.75, 0.59)  |
| -1.5<br>(-2.67, -0.33)  | -3.99<br>(-4.96, -3.02) | -1.69<br>(-2.5, -0.89)  | 0.55<br>(-0.09, 1.2)   | -2.49<br>(-3.58, -1.41) | 0.57<br>(-0.21, 1.36)  | 0.47<br>(-0.52, 1.46)      | 0.47<br>(-0.16, 1.11)  | 0.66<br>(-0.37, 1.69)   | -3.8<br>(-5.62, -1.98)  | -2.79<br>(-3.72, -1.86) | -3.79<br>(-4.32, -3.26) | -4.04<br>(-4.78, -3.3)  | -3.33<br>(-4.34, -2.33) | -1.56<br>(-2.29, -0.83) | LIRA<br>(-1.48, 0.59)  | 0.45<br>(-1.09, 1.48)   | -0.45<br>(-1.48, 0.59)  | 0.2<br>(-1.09, 1.48)    | -2.2<br>(-3.16, -1.25)  | -3.65<br>(-4.55, -2.77) | -1.6<br>(-2.12, -1.08)  | -4.87<br>(-6.49, -3.25) | -3.75<br>(-4.44, -3.07) | -1.66<br>(-2.38, -0.95) | -1.64<br>(-2.27, -1.01) |
| -1.05<br>(-2.43, 0.33)  | -3.54<br>(-4.77, -2.32) | -1.25<br>(-2.34, -0.15) | 1<br>(-0.02, 2.02)     | -2.05<br>(-3.39, -0.7)  | 1.02<br>(-0.06, 2.1)   | 0.92<br>(-0.34, 2.18)      | 0.92<br>(-0.08, 1.92)  | 1.11<br>(0.31, 1.9)     | -3.35<br>(-5.32, -1.39) | -2.35<br>(-3.55, 1.14)  | -3.34<br>(-4.3, -2.38)  | -3.59<br>(-4.65, -2.54) | -2.89<br>(-4.18, -1.59) | -1.11<br>(-2.18, -0.05) | 0.45<br>(-0.59, 1.48)  | LIX<br>(-0.83, 2.15)    | 0.62<br>(-2.96, -0.55)  | -1.75<br>(-4.38, -2.02) | -1.15<br>(-2.05, -0.26) | -4.42<br>(-6.2, -2.65)  | -3.31<br>(-4.34, -2.28) | -1.22<br>(-2.24, -0.19) | -1.37<br>(-2.32, -0.42) | -1.19<br>(-2.18, -0.21) | -1.19<br>(-2.18, -0.21) |
| -1.7<br>(-3.28, -0.12)  | -4.19<br>(-5.63, -2.75) | -1.89<br>(-3.23, -0.56) | 0.35<br>(-0.92, 1.62)  | -2.69<br>(-4.24, -1.15) | 0.37<br>(-0.95, 1.69)  | 0.27<br>(-1.2, 1.74)       | 0.28<br>(-0.98, 1.53)  | 0.46<br>(-1.01, 1.93)   | -4<br>(-6.1, -1.9)      | -2.99<br>(-4.41, -1.57) | -3.99<br>(-5.22, -2.76) | -4.24<br>(-5.54, -2.94) | -3.53<br>(-5.03, -2.03) | -1.76<br>(-3.07, -0.45) | -0.2<br>(-1.48, 1.09)  | -0.65<br>(-2.12, 0.83)  | MIG<br>(-3.82, -0.98)   | -2.4<br>(-5.26, -2.47)  | -1.8<br>(-2.98, -0.62)  | -5.07<br>(-7, -3.14)    | -3.95<br>(-5.23, -2.67) | -1.86<br>(-3.14, -0.58) | -2.01<br>(-3.23, -0.79) | -1.84<br>(-3.08, -0.59) | -1.84<br>(-3.08, -0.59) |
| 0.7<br>(-0.62, 2.02)    | -1.79<br>(-2.95, -0.63) | 0.51<br>(-0.51, 1.53)   | 2.75<br>(1.82, 3.69)   | -0.29<br>(-1.58, 0.99)  | 2.67<br>(1.77, 3.78)   | 2.68<br>(1.48, 3.86)       | 2.86<br>(1.76, 3.95)   | 2.86<br>(1.66, 4.06)    | -1.6<br>(-3.52, 0.32)   | -0.59<br>(-1.72, 0.54)  | -1.59<br>(-2.46, -0.71) | -1.84<br>(-2.81, -0.86) | -1.13<br>(-2.36, 0.1)   | 0.64<br>(-0.35, 1.63)   | 1.2<br>(1.25, 3.16)    | 1.75<br>(0.55, 2.96)    | 2.4<br>(0.98, 3.82)     | NAT<br>(-2.56, -0.36)   | 0.6<br>(-0.2, 1.4)      | -1.46<br>(-4.4, -0.94)  | -1.55<br>(-2.5, -0.61)  | 0.54<br>(-0.41, 1.49)   | 0.39<br>(-0.47, 1.25)   | 0.56<br>(-0.34, 1.46)   | 0.56<br>(-0.34, 1.46)   |
| 2.16<br>(0.87, 3.45)    | -0.33<br>(-1.12, 0.46)  | 1.97<br>(1.19, 2.75)    | 4.21<br>(3.34, 5.08)   | 1.17<br>(-0.08, 2.41)   | 4.24<br>(3.27, 5.2)    | 4.13<br>(3.2, 5.27)        | 4.14<br>(3.29, 4.98)   | 4.32<br>(3.16, 5.48)    | -0.14<br>(-2.04, 1.76)  | 0.87<br>(-0.22, 1.96)   | -0.13<br>(-0.9, 0.64)   | -0.38<br>(-1.31, 0.56)  | 0.33<br>(-0.86, 1.51)   | 2.1<br>(1.19, 3.02)     | 3.66<br>(2.77, 4.5)    | 3.22<br>(2.05, 4.38)    | 3.86<br>(2.47, 5.26)    | 1.46<br>(0.36, 2.56)    | PIO<br>(1.31, 2.81)     | -1.21<br>(-2.92, 0.5)   | -0.09<br>(-0.99, 0.8)   | 2.0<br>(1.09, 2.9)      | 1.85<br>(1.05, 2.65)    | 2.02<br>(1.19, 2.86)    | 2.02<br>(1.19, 2.86)    |
| 0.1<br>(-0.95, 1.15)    | -2.39<br>(-3.23, -1.55) | -0.09<br>(-0.72, 0.53)  | 2.15<br>(1.67, 2.      |                         |                        |                            |                        |                         |                         |                         |                         |                         |                         |                         |                        |                         |                         |                         |                         |                         |                         |                         |                         |                         |                         |
