# Supplementary material for: Comparative Efficacy and Safety of Antidiabetic Drug Regimens Added to Metformin Monotherapy in Patients with Type 2 Diabetes: A Network Meta-Analysis
Source: PubMed Central journal article supplement (PMC4412636; doi:10.1371/journal.pone.0125879), 2015-04-28
Supplement: pone.0125879.s008.pdf [file pone.0125879.s008.pdf]

**Figure S5. Network Meta-Analysis Results of the Effect of Antidiabetic Therapies on Change in Systolic Blood Pressure From Baseline**

|                        |                        |                       |                        |                        |                         |                          |                         |                        |                        |                         |                          |                         |                        |
|------------------------|------------------------|-----------------------|------------------------|------------------------|-------------------------|--------------------------|-------------------------|------------------------|------------------------|-------------------------|--------------------------|-------------------------|------------------------|
| <b>CANA</b>            | 0.36<br>(-3.49, 4.21)  | 1.29<br>(-1.86, 4.44) | 1.0<br>(-0.98, 2.98)   | -1.3<br>(-4.33, 1.73)  | -4.4<br>(-6.06, -2.75)  | -4.64<br>(-9.15, -0.13)  | -2.56<br>(-5.96, 0.84)  | -1.1<br>(-3.15, 0.95)  | -1.4<br>(-5.47, 2.66)  | -4.14<br>(-5.8, -2.48)  | -4.78<br>(-8.01, -1.56)  | -2.26<br>(-3.87, -0.65) | -0.26<br>(-7.19, 6.67) |
| -0.36<br>(-4.21, 3.49) | <b>DAPA</b>            | 0.93<br>(-3.63, 5.5)  | 0.64<br>(-3.21, 4.49)  | -1.66<br>(-6.29, 2.96) | -4.76<br>(-8.63, -0.9)  | -5.0<br>(-7.35, -2.65)   | -2.92<br>(-7.66, 1.82)  | -1.46<br>(-5.47, 2.55) | -1.76<br>(-7.12, 3.6)  | -4.5<br>(-7.97, -1.03)  | -5.14<br>(-9.58, -0.7)   | -2.62<br>(-6.4, 1.16)   | -0.62<br>(-8.35, 7.11) |
| -1.29<br>(-4.44, 1.86) | -0.93<br>(-5.5, 3.63)  | <b>EMPA/LINA</b>      | -0.29<br>(-2.74, 2.16) | -2.59<br>(-6.49, 1.3)  | -5.69<br>(-8.65, -2.73) | -5.93<br>(-11.07, -0.8)  | -3.85<br>(-6.61, -1.09) | -2.39<br>(-5.69, 0.9)  | -2.69<br>(-7.44, 2.05) | -5.43<br>(-8.39, -2.47) | -6.08<br>(-10.13, -2.02) | -3.55<br>(-6.65, -0.46) | -1.55<br>(-8.97, 5.86) |
| -1<br>(-2.98, 0.98)    | -0.64<br>(-4.49, 3.21) | 0.29<br>(-2.16, 2.74) | <b>EMPA</b>            | -2.3<br>(-5.34, 0.73)  | -5.4<br>(-7.06, -3.74)  | -5.64<br>(-10.15, -1.13) | -3.56<br>(-6.32, -0.8)  | -2.1<br>(-4.3, 0.09)   | -2.4<br>(-6.47, 1.66)  | -5.14<br>(-6.8, -3.48)  | -5.79<br>(-9.01, -2.56)  | -3.26<br>(-5.15, -1.37) | -1.26<br>(-8.26, 5.74) |
| 1.3<br>(-1.73, 4.33)   | 1.66<br>(-2.96, 6.29)  | 2.59<br>(-1.3, 6.49)  | 2.3<br>(-0.73, 5.34)   | <b>EXEN</b>            | -3.1<br>(-5.64, -0.56)  | -3.34<br>(-8.53, 1.85)   | -1.26<br>(-5.36, 2.85)  | 0.2<br>(-2.95, 3.35)   | -0.1<br>(-4.6, 4.4)    | -2.84<br>(-5.89, 0.22)  | -3.48<br>(-7.6, 0.64)    | -0.96<br>(-4.03, 2.11)  | 1.04<br>(-6.36, 8.45)  |
| 4.4<br>(2.75, 6.06)    | 4.76<br>(0.9, 8.63)    | 5.69<br>(2.73, 8.65)  | 5.4<br>(3.74, 7.06)    | 3.1<br>(0.56, 5.64)    | <b>GLIM</b>             | -0.24<br>(-4.76, 4.29)   | 1.84<br>(-1.38, 5.07)   | 3.3<br>(1.44, 5.16)    | 3.0<br>(-0.71, 6.71)   | 0.26<br>(-1.44, 1.96)   | -0.38<br>(-3.63, 2.87)   | 2.14<br>(0.41, 3.87)    | 4.14<br>(-2.82, 11.1)  |
| 4.64<br>(0.13, 9.15)   | 5<br>(2.65, 7.35)      | 5.93<br>(0.8, 11.07)  | 5.64<br>(1.13, 10.15)  | 3.34<br>(-1.85, 8.53)  | 0.24<br>(-4.29, 4.76)   | <b>GLIP</b>              | 2.08<br>(-3.21, 7.37)   | 3.54<br>(-1.11, 8.19)  | 3.24<br>(-2.62, 9.09)  | 0.5<br>(-3.69, 4.69)    | -0.14<br>(-5.17, 4.88)   | 2.38<br>(-2.07, 6.83)   | 4.38<br>(-3.7, 12.46)  |
| 2.56<br>(-0.84, 5.96)  | 2.92<br>(-1.82, 7.66)  | 3.85<br>(1.09, 6.61)  | 3.56<br>(0.8, 6.32)    | 1.26<br>(-2.85, 5.36)  | -1.84<br>(-5.07, 1.38)  | -2.08<br>(-7.37, 3.21)   | <b>LINA</b>             | 1.46<br>(-2.08, 4.99)  | 1.16<br>(-3.76, 6.07)  | -1.58<br>(-4.81, 1.64)  | -2.23<br>(-6.48, 2.02)   | 0.3<br>(-3.05, 3.65)    | 2.3<br>(-5.23, 9.82)   |
| 1.1<br>(-0.95, 3.15)   | 1.46<br>(-2.55, 5.47)  | 2.39<br>(-0.9, 5.69)  | 2.1<br>(-0.09, 4.3)    | -0.2<br>(-3.35, 2.95)  | -3.3<br>(-5.16, -1.44)  | -3.54<br>(-8.19, 1.11)   | -1.46<br>(-4.99, 2.08)  | <b>LIRA</b>            | -0.3<br>(-4.46, 3.85)  | -3.04<br>(-5.05, -1.03) | -3.68<br>(-7.1, -0.26)   | -1.16<br>(-2.78, 0.47)  | 0.84<br>(-6.09, 7.77)  |
| 1.4<br>(-2.66, 5.47)   | 1.76<br>(-3.6, 7.12)   | 2.69<br>(-2.05, 7.44) | 2.4<br>(-1.66, 6.47)   | 0.1<br>(-4.4, 4.6)     | -3<br>(-6.71, 0.71)     | -3.24<br>(-9.09, 2.62)   | -1.16<br>(-6.07, 3.76)  | 0.3<br>(-3.85, 4.46)   | <b>PIO</b>             | -2.74<br>(-6.82, 1.35)  | -3.38<br>(-8.32, 1.55)   | -0.86<br>(-4.96, 3.24)  | 1.14<br>(-6.75, 9.03)  |
| 4.14<br>(2.48, 5.8)    | 4.5<br>(1.03, 7.97)    | 5.43<br>(2.47, 8.39)  | 5.14<br>(3.48, 6.8)    | 2.84<br>(-0.22, 5.89)  | -0.26<br>(-1.96, 1.44)  | -0.5<br>(-4.69, 3.69)    | 1.58<br>(-1.64, 4.81)   | 3.04<br>(1.03, 5.05)   | 2.74<br>(-1.35, 6.82)  | <b>PLC</b>              | -0.64<br>(-3.41, 2.13)   | 1.88<br>(0.38, 3.38)    | 3.88<br>(-3.02, 10.79) |
| 4.78<br>(1.56, 8.01)   | 5.14<br>(0.79, 5.8)    | 6.08<br>(2.02, 10.13) | 5.79<br>(2.56, 9.01)   | 3.48<br>(-0.64, 7.6)   | 0.38<br>(-2.87, 3.63)   | 0.14<br>(-4.88, 5.17)    | 2.23<br>(-2.02, 6.48)   | 3.68<br>(0.26, 7.1)    | 3.38<br>(-1.55, 8.32)  | 0.64<br>(-2.13, 3.41)   | <b>SAX</b>               | 2.52<br>(-0.63, 5.67)   | 4.52<br>(-2.92, 11.96) |
| 2.26<br>(0.65, 3.87)   | 2.62<br>(-1.16, 6.4)   | 3.55<br>(0.46, 6.65)  | 3.26<br>(1.37, 5.15)   | 0.96<br>(-2.11, 4.03)  | -2.14<br>(-3.87, -0.41) | -2.38<br>(-6.83, 2.07)   | -0.3<br>(-3.65, 3.05)   | 1.16<br>(-0.47, 2.78)  | 0.86<br>(-3.24, 4.96)  | -1.88<br>(-3.38, -0.38) | -2.52<br>(-5.67, 0.63)   | <b>SITA</b>             | 2.0<br>(-4.74, 8.74)   |
| 0.26<br>(-6.67, 7.19)  | 0.62<br>(-7.11, 8.35)  | 1.55<br>(-5.86, 8.97) | 1.26<br>(-5.74, 8.26)  | -1.04<br>(-8.45, 6.36) | -4.14<br>(-11.1, 2.82)  | -4.38<br>(-12.46, 3.7)   | -2.3<br>(-9.82, 5.23)   | -0.84<br>(-7.77, 6.09) | -1.14<br>(-9.03, 6.75) | -3.88<br>(-10.79, 3.02) | -4.52<br>(-11.96, 2.92)  | -2<br>(-8.74, 4.74)     | <b>VILDA</b>           |
