# Supplementary material for: Comparative Efficacy and Safety of Antidiabetic Drug Regimens Added to Metformin Monotherapy in Patients with Type 2 Diabetes: A Network Meta-Analysis
Source: PubMed Central journal article supplement (PMC4412636; doi:10.1371/journal.pone.0125879), 2015-04-28
Supplement: pone.0125879.s009.pdf [file pone.0125879.s009.pdf]

**Figure S6 . Network Meta-Analysis Results of the Effect of Antidiabetic Therapies on Risk of Confirmed Hypoglycemia**

|                          |                           |                        |                         |                         |                          |                             |                             |                             |                             |                             |                               |                               |                               |                             |                              |                               |                          |                               |                               |                              |                                |
|--------------------------|---------------------------|------------------------|-------------------------|-------------------------|--------------------------|-----------------------------|-----------------------------|-----------------------------|-----------------------------|-----------------------------|-------------------------------|-------------------------------|-------------------------------|-----------------------------|------------------------------|-------------------------------|--------------------------|-------------------------------|-------------------------------|------------------------------|--------------------------------|
| ACA<br>(0.1, 94.46)      | 3.1<br>(0.03, 9.59)       | 0.56<br>(0.03, 9.13)   | 0.52<br>(0.06, 17.49)   | 1.0<br>(0.05, 33.48)    | 1.34<br>(0.02, 4.7)      | 0.28<br>(0, 1.61)           | 0.07<br>(0, 1.11)           | 0.05<br>(0.01, 1.94)        | 0.13<br>(0, 0.74)           | 1.1<br>(0.07, 18.46)        | 0.65<br>(0.04, 10.9)          | 0.55<br>(0.03, 11.14)         | 0.07<br>(0, 1.64)             | 0.4<br>(0.02, 8.92)         | 0.51<br>(0.04, 7.23)         | 0.03<br>(0, 1.53)             | 0.5<br>(0.03, 9.99)      | 0.58<br>(0.03, 10.69)         | 0.39<br>(0.02, 6.14)          | 0.68<br>(0.04, 11.85)        |                                |
| 0.32<br>(0.01, 9.86)     | <b>ALO</b>                | 0.18<br>(0.02, 1.94)   | 0.17<br>(0.02, 1.85)    | 0.32<br>(0.03, 3.55)    | 0.43<br>(0.03, 7.22)     | <b>0.09</b><br>(0.01, 0.95) | <b>0.02</b><br>(0, 0.34)    | <b>0.02</b><br>(0, 0.24)    | <b>0.04</b><br>(0, 0.38)    | <b>0.01</b><br>(0, 0.15)    | 0.35<br>(0.03, 3.72)          | 0.21<br>(0.02, 2.19)          | 0.18<br>(0.01, 2.32)          | <b>0.02</b><br>(0, 0.35)    | 0.13<br>(0.01, 1.89)         | 0.16<br>(0.02, 1.4)           | <b>0.01</b><br>(0, 0.36) | 0.16<br>(0.01, 2.08)          | 0.19<br>(0.02, 2.19)          | 0.13<br>(0.01, 1.22)         | 0.22<br>(0.02, 2.4)            |
| 1.79<br>(0.1, 30.88)     | 5.55<br>(0.52, 59.88)     | <b>CANA</b>            | 0.94<br>(0.23, 3.92)    | 1.79<br>(0.46, 6.91)    | 2.4<br>(0.32, 17.76)     | 0.5<br>(0.14, 1.83)         | <b>0.13</b><br>(0.02, 0.76) | <b>0.09</b><br>(0.01, 0.56) | <b>0.23</b><br>(0.09, 0.59) | <b>0.08</b><br>(0.02, 0.29) | 1.97<br>(0.55, 7.08)          | 1.17<br>(0.34, 4.02)          | 0.98<br>(0.18, 5.31)          | <b>0.13</b><br>(0.02, 0.87) | 0.71<br>(0.11, 4.44)         | 0.91<br>(0.33, 2.51)          | 0.05<br>(0, 1.2)         | 0.9<br>(0.17, 4.82)           | 1.03<br>(0.23, 4.62)          | 0.7<br>(0.24, 2.07)          | 1.22<br>(0.31, 4.74)           |
| 1.91<br>(0.11, 33.23)    | 5.91<br>(0.54, 64.58)     | 1.06<br>(0.26, 4.43)   | <b>DAPA</b>             | 1.9<br>(0.44, 8.29)     | 2.55<br>(0.32, 20.47)    | 0.53<br>(0.13, 2.16)        | <b>0.14</b><br>(0.02, 0.85) | <b>0.1</b><br>(0.01, 0.63)  | <b>0.24</b><br>(0.07, 0.79) | <b>0.08</b><br>(0.03, 0.25) | 2.09<br>(0.52, 8.45)          | 1.25<br>(0.33, 4.71)          | 1.04<br>(0.18, 6.04)          | <b>0.13</b><br>(0.02, 0.97) | 0.76<br>(0.11, 5.13)         | 0.97<br>(0.34, 2.76)          | 0.05<br>(0, 1.28)        | 0.96<br>(0.17, 5.32)          | 1.1<br>(0.24, 5.0)            | 0.74<br>(0.23, 2.4)          | 1.3<br>(0.3, 5.62)             |
| 1<br>(0.06, 17.65)       | 3.11<br>(0.28, 34.36)     | 0.56<br>(0.14, 2.17)   | 0.53<br>(0.12, 2.3)     | <b>EMPA</b>             | 1.34<br>(0.26, 6.97)     | 0.28<br>(0.07, 1.06)        | <b>0.08</b><br>(0.01, 0.45) | <b>0.05</b><br>(0.01, 0.32) | <b>0.13</b><br>(0.05, 0.35) | <b>0.04</b><br>(0.01, 0.17) | 1.1<br>(0.34, 3.57)           | 0.66<br>(0.18, 2.39)          | 0.55<br>(0.1, 3.06)           | <b>0.07</b><br>(0.01, 0.5)  | 0.4<br>(0.06, 2.55)          | 0.51<br>(0.17, 1.49)          | <b>0.03</b><br>(0, 0.68) | 0.5<br>(0.09, 2.8)            | 0.58<br>(0.12, 2.73)          | 0.39<br>(0.12, 1.26)         | 0.68<br>(0.17, 2.75)           |
| 0.75<br>(0.03, 18.76)    | 2.32<br>(0.14, 38.75)     | 0.42<br>(0.06, 3.09)   | 0.39<br>(0.05, 3.15)    | 0.75<br>(0.14, 3.87)    | <b>EMPA/LINA</b>         | 0.21<br>(0.03, 1.52)        | <b>0.06</b><br>(0.01, 0.57) | <b>0.04</b><br>(0, 0.4)     | <b>0.09</b><br>(0.02, 0.57) | <b>0.03</b><br>(0, 0.25)    | 0.82<br>(0.14, 4.85)          | 0.49<br>(0.07, 3.48)          | 0.41<br>(0.04, 3.94)          | <b>0.05</b><br>(0, 0.61)    | 0.3<br>(0.03, 3.18)          | 0.38<br>(0.06, 2.34)          | <b>0.02</b><br>(0, 0.7)  | 0.38<br>(0.04, 3.6)           | 0.43<br>(0.05, 3.67)          | 0.29<br>(0.04, 1.92)         | 0.51<br>(0.07, 3.87)           |
| 3.59<br>(0.21, 60.67)    | 11.12<br>(1.06, 117.21)   | 2<br>(0.55, 7.34)      | 1.88<br>(0.46, 7.67)    | 3.58<br>(0.94, 13.6)    | 4.8<br>(0.66, 35.1)      | <b>EXEN</b>                 | 0.27<br>(0.05, 1.55)        | 0.18<br>(0.03, 1.1)         | 0.46<br>(0.18, 1.17)        | <b>0.16</b><br>(0.04, 0.59) | <b>3.94</b><br>(1.12, 13.83)  | 2.35<br>(0.68, 8.13)          | 1.97<br>(0.56, 6.91)          | 0.25<br>(0.04, 1.7)         | 1.42<br>(0.23, 8.74)         | 1.82<br>(0.7, 4.76)           | 0.1<br>(0, 2.35)         | 1.81<br>(0.35, 9.43)          | 2.07<br>(0.46, 9.3)           | 1.4<br>(0.46, 4.3)           | 2.44<br>(0.64, 9.27)           |
| 13.37<br>(0.62, 287.65)  | 41.4<br>(2.95, 580.44)    | 7.45<br>(1.32, 4.2)    | 7.01<br>(1.18, 41.72)   | 13.31<br>(2.24, 79.08)  | 17.86<br>(1.76, 181.19)  | 3.72<br>(0.65, 21.46)       | <b>GLAR</b>                 | 0.68<br>(0.08, 5.85)        | 1.69<br>(0.36, 7.87)        | 0.58<br>(0.11, 3.01)        | <b>14.67</b><br>(2.58, 83.37) | <b>8.74</b><br>(1.83, 41.81)  | 7.32<br>(0.94, 57.03)         | 0.94<br>(0.1, 8.89)         | 5.3<br>(0.6, 46.59)          | <b>6.78</b><br>(1.46, 31.4)   | 0.36<br>(0.01, 10.87)    | 6.72<br>(0.89, 50.49)         | 7.7<br>(1.32, 44.77)          | <b>5.21</b><br>(1.36, 19.98) | <b>9.09</b><br>(1.5, 54.9)     |
| 19.78<br>(0.9, 435.16)   | 61.23<br>(4.25, 881.28)   | 11.03<br>(1.78, 68.28) | 10.37<br>(1.58, 68.12)  | 19.69<br>(3.09, 125.54) | 26.42<br>(2.48, 281.9)   | 5.51<br>(0.91, 33.4)        | 1.48<br>(0.17, 12.8)        | <b>GLIC</b>                 | 2.51<br>(0.5, 12.47)        | 0.86<br>(0.14, 5.33)        | <b>21.7</b><br>(3.61, 130.4)  | <b>12.92</b><br>(2.19, 76.35) | <b>10.83</b><br>(1.33, 87.89) | 1.39<br>(0.42, 4.59)        | <b>7.84</b><br>(1.97, 31.2)  | <b>10.02</b><br>(2.07, 48.56) | 0.53<br>(0.02, 16.41)    | <b>9.94</b><br>(1.84, 53.73)  | <b>11.39</b><br>(1.61, 80.78) | 7.7<br>(1.42, 41.64)         | <b>13.44</b><br>(2.11, 85.42)  |
| 7.89<br>(0.52, 120.83)   | 24.43<br>(2.61, 228.68)   | 4.4<br>(1.68, 11.49)   | 4.14<br>(1.27, 13.44)   | 7.86<br>(2.89, 21.39)   | 10.54<br>(1.77, 62.88)   | 2.2<br>(0.86, 5.62)         | 0.59<br>(0.13, 2.74)        | 0.4<br>(0.08, 1.98)         | <b>GLIM</b>                 | <b>0.34</b><br>(0.12, 0.99) | <b>3.49</b><br>(3.49, 21.49)  | <b>5.16</b><br>(2.1, 12.66)   | <b>4.32</b><br>(1.02, 18.31)  | 0.56<br>(0.1, 3.12)         | 3.13<br>(0.64, 15.39)        | <b>4</b><br>(2.16, 7.41)      | 0.21<br>(0.01, 4.74)     | 3.97<br>(0.92, 17.08)         | <b>4.54</b><br>(1.28, 16.12)  | <b>3.07</b><br>(1.46, 6.45)  | <b>5.36</b><br>(1.94, 14.82)   |
| 23.03<br>(1.36, 390.38)  | 71.29<br>(6.73, 754.73)   | 12.84<br>(3.44, 48.45) | 12.07<br>(4.06, 35.89)  | 22.93<br>(5.74, 91.58)  | 30.77<br>(4.06, 232.89)  | 6.41<br>(1.7, 24.14)        | 1.72<br>(0.33, 8.92)        | 1.16<br>(0.19, 7.23)        | 2.92<br>(1.01, 8.42)        | <b>GLIP</b>                 | <b>25.27</b><br>(6.8, 93.85)  | <b>15.05</b><br>(4.63, 48.89) | <b>12.61</b><br>(2.31, 68.78) | 1.62<br>(0.24, 11.1)        | <b>9.12</b><br>(1.43, 58.27) | <b>11.67</b><br>(4.41, 30.87) | 0.62<br>(0.03, 15.14)    | <b>11.57</b><br>(2.21, 60.49) | <b>13.26</b><br>(3.45, 51.0)  | <b>8.97</b><br>(3.48, 23.1)  | <b>15.65</b><br>(3.9, 62.82)   |
| 0.91<br>(0.05, 15.34)    | 2.82<br>(0.27, 29.61)     | 0.51<br>(0.14, 1.83)   | 0.48<br>(0.12, 1.93)    | 0.91<br>(0.28, 2.94)    | 1.22<br>(0.21, 7.19)     | 0.25<br>(0.07, 0.89)        | 0.07<br>(0.01, 0.39)        | 0.05<br>(0.01, 0.28)        | 0.12<br>(0.05, 0.29)        | 0.04<br>(0.01, 0.15)        | <b>LINA</b>                   | 0.6<br>(0.18, 2.02)           | 0.5<br>(0.1, 2.61)            | <b>0.06</b><br>(0.01, 0.43) | 0.36<br>(0.06, 2.19)         | 0.46<br>(0.18, 1.2)           | <b>0.02</b><br>(0, 0.6)  | 0.46<br>(0.09, 2.37)          | 0.52<br>(0.12, 2.33)          | 0.35<br>(0.12, 1.07)         | 0.62<br>(0.17, 2.31)           |
| 1.53<br>(0.09, 25.53)    | 4.74<br>(0.46, 49.21)     | 0.85<br>(0.25, 2.93)   | 0.8<br>(0.21, 3.03)     | 1.52<br>(0.42, 5.54)    | 2.04<br>(0.29, 14.56)    | 0.43<br>(0.12, 1.48)        | 0.11<br>(0.02, 0.55)        | 0.08<br>(0.01, 0.46)        | 0.19<br>(0.08, 0.48)        | 0.07<br>(0.02, 0.22)        | 1.68<br>(0.49, 5.7)           | <b>LIRA</b>                   | 0.84<br>(0.16, 4.33)          | <b>0.11</b><br>(0.02, 0.71) | 0.61<br>(0.1, 3.63)          | 0.78<br>(0.31, 1.96)          | <b>0.04</b><br>(0, 0.99) | 0.77<br>(0.15, 3.86)          | 0.88<br>(0.23, 3.4)           | 0.6<br>(0.27, 1.33)          | 1.04<br>(0.28, 3.84)           |
| 1.83<br>(0.09, 37.19)    | 5.66<br>(0.43, 74.36)     | 1.02<br>(0.19, 5.51)   | 0.96<br>(0.17, 5.54)    | 1.82<br>(0.33, 10.14)   | 2.44<br>(0.25, 23.47)    | 0.51<br>(0.14, 1.79)        | 0.14<br>(0.02, 1.06)        | 0.09<br>(0.01, 0.75)        | 0.23<br>(0.05, 0.98)        | 0.08<br>(0.01, 0.43)        | 2<br>(0.38, 10.47)            | 1.19<br>(0.23, 6.17)          | <b>LIX</b>                    | 0.13<br>(0.01, 1.14)        | 0.72<br>(0.09, 5.97)         | 0.93<br>(0.22, 3.83)          | 0.05<br>(0, 1.41)        | 0.92<br>(0.13, 6.52)          | 1.05<br>(0.17, 6.62)          | 0.71<br>(0.15, 3.36)         | 1.24<br>(0.22, 6.89)           |
| 14.19<br>(0.61, 329.56)  | 43.93<br>(2.87, 673.1)    | 7.91<br>(1.15, 54.23)  | 7.44<br>(1.03, 53.49)   | 14.13<br>(2.99, 62)     | 18.96<br>(1.64, 218.91)  | 3.95<br>(0.59, 26.51)       | 1.06<br>(0.11, 10.01)       | 0.72<br>(0.22, 2.36)        | 1.8<br>(0.32, 10.09)        | 0.62<br>(0.09, 4.21)        | 15.57<br>(2.34, 103.63)       | 9.27<br>(1.41, 60.77)         | 7.77<br>(0.88, 68.66)         | <b>NAT</b>                  | <b>5.62</b><br>(1.01, 31.26) | <b>7.19</b><br>(1.34, 38.65)  | 0.38<br>(0.01, 12.36)    | <b>7.13</b><br>(1.09, 46.49)  | <b>8.17</b><br>(1.05, 63.47)  | 5.52<br>(0.92, 33.3)         | <b>9.64</b><br>(1.37, 67.67)   |
| 2.52<br>(0.11, 56.81)    | 7.81<br>(0.53, 115.47)    | 1.41<br>(0.23, 8.79)   | 1.32<br>(0.19, 8.98)    | 2.51<br>(0.39, 16.11)   | 3.37<br>(0.31, 36.17)    | 0.7<br>(0.11, 4.31)         | 0.19<br>(0.02, 1.66)        | 0.13<br>(0.03, 0.51)        | 0.32<br>(0.06, 1.57)        | 0.11<br>(0.02, 0.7)         | 2.77<br>(0.46, 16.81)         | 1.65<br>(0.28, 9.88)          | 1.38<br>(0.17, 11.4)          | 0.18<br>(0.03, 0.99)        | <b>PIO</b>                   | 1.28<br>(0.25, 6.48)          | 0.07<br>(0, 2.14)        | 1.27<br>(0.19, 8.27)          | 1.45<br>(0.2, 10.56)          | 0.98<br>(0.18, 5.42)         | 1.72<br>(0.27, 11.01)          |
| 1.97<br>(0.14, 28.16)    | 6.11<br>(0.71, 52.43)     | 1.1<br>(0.43, 0.4)     | 1.03<br>(0.36, 2.95)    | 1.97<br>(0.67, 5.75)    | 2.64<br>(0.43, 16.28)    | 0.55<br>(0.21, 1.44)        | 0.15<br>(0.03, 0.68)        | 0.1<br>(0.02, 0.48)         | 0.25<br>(0.13, 0.46)        | 0.09<br>(0.03, 0.23)        | 2.17<br>(0.84, 5.61)          | 1.29<br>(0.51, 3.25)          | 1.08<br>(0.26, 4.47)          | 0.14<br>(0.03, 0.75)        | 0.78<br>(0.15, 3.96)         | <b>PLC</b>                    | 0.05<br>(0, 1.11)        | 0.99<br>(0.25, 3.9)           | 1.14<br>(0.34, 3.82)          | 0.77<br>(0.37, 1.61)         | 1.34<br>(0.47, 3.84)           |
| 37.34<br>(0.65, 2131.44) | 115.58<br>(2.77, 4818.97) | 20.81<br>(0.84, 517.7) | 19.57<br>(0.78, 491.77) | 37.17<br>(1.47, 941.54) | 49.88<br>(1.43, 1737.91) | 10.39<br>(0.42, 254.14)     | 2.79<br>(0.09, 84.73)       | 1.89<br>(0.06, 58.46)       | 4.73<br>(0.21, 106.14)      | 1.62<br>(0.07, 39.78)       | 40.96<br>(1.68, 998.87)       | 24.39<br>(1.01, 590.23)       | 20.44<br>(0.71, 590.23)       | 2.63<br>(0.08, 85.58)       | 14.79<br>(0.47, 467.58)      | 18.92<br>(0.9, 398.91)        | <b>REP</b>               | 18.76<br>(0.66, 530.73)       | 21.49<br>(0.81, 571.92)       | 14.54<br>(0.63, 334.73)      | <b>25.37</b><br>(1.01, 638.33) |
| 1.99<br>(0.1, 39.57)     | 6.16<br>(0.48, 78.8)      | 1.11<br>(0.21, 5.93)   | 1.04<br>(0.19, 5.79)    | 1.98<br>(0.36, 10.98)   | 2.66<br>(0.28, 25.43)    | 0.55<br>(0.11, 2.89)        | 0.15<br>(0.02, 1.12)        | 0.1<br>(0.02, 0.54)         | 0.25<br>(0.06, 1.09)        | 0.09<br>(0.02, 0.45)        | 2.18<br>(0.42, 11.31)         | 1.3<br>(0.26, 6.52)           | 1.09<br>(0.15, 7.73)          | 0.14<br>(0.02, 0.91)        | 0.79<br>(0.12, 5.14)         | 1.01<br>(0.26, 3.97)          | 0.05<br>(0, 1.51)        | <b>ROSI</b>                   | 1.15<br>(0.19, 6.93)          | 0.77<br>(0.17, 3.48)         | 1.35<br>(0.25, 7.44)           |
| 1.74<br>(0.09, 32.26)    | 5.38<br>(0.46, 63.47)     | 0.97<br>(0.22, 4.33)   | 0.91<br>(0.24, 1.5)     | 1.73<br>(0.37, 8.15)    | 2.32<br>(0.27, 19.76)    | 0.48<br>(0.11, 2.17)        | 0.13<br>(0.02, 0.76)        | 0.09<br>(0.01, 0.62)        | 0.22<br>(0.06, 0.78)        | 0.08<br>(0.02, 0.29)        | 1.91<br>(0.43, 8.45)          | 1.13<br>(0.29, 4.38)          | 0.95<br>(0.15, 5.99)          | 0.12<br>(0.02, 0.95)        | 0.69<br>(0.09, 5)            | 0.88<br>(0.26, 2.96)          | 0.05<br>(0, 1.24)        | 0.87<br>(0.14, 5.28)          | <b>SAX</b>                    | 0.68<br>(0.22, 2.11)         | 1.18<br>(0.25, 5.61)           |
| 2.57<br>(0.16, 40.5)     | 7.95<br>(0.82, 77.14)     | 1.43<br>(0.48, 4.24)   | 1.35<br>(0.42, 4.35)    | 2.56<br>(0.79, 8.23)    | 3.43<br>(0.52, 22.63)    | 0.71<br>(0.23, 2.2)         | 0.19<br>(0.05, 0.74)        | 0.13<br>(0.02, 0.7)         | 0.33<br>(0.16, 0.68)        | 0.11<br>(0.04, 0.29)        | 2.82<br>(0.94, 8.46)          | 1.68<br>(0.75, 3.74)          | 1.41<br>(0.3, 6.63)           | 0.18<br>(0.03, 1.09)        | 1.02<br>(0.18, 5.62)         | 1.3<br>(0.62, 2.72)           | 0.07<br>(0, 1.58)        | 1.29<br>(0.29, 5.8)           | 1.48<br>(0.47, 4.61)          | <b>SITA</b>                  | 1.75<br>(0.53, 5.76)           |
| 1.47<br>(0.08, 25.66)    | 4.56<br>(0.42, 49.89)     | 0.82<br>(0.21, 3.19)   | 0.77<br>(0.18, 3.34)    | 1.47<br>(0.36, 5.9)     | 1.97<br>(0.26, 14.96)    | 0.41<br>(0.11, 1.56)        | 0.11<br>(0.02, 0.66)        | 0.07<br>(0.01, 0.47)        | 0.19<br>(0.07, 0.52)        | 0.06<br>(0.02, 0.26)        | 1.61<br>(0.43, 6.03)          | 0.96<br>(0.26, 3.55)          | 0.81<br>(0.15, 4.47)          | 0.1<br>(0.01, 0.73)         | 0.58<br>(0.09, 3.74)         | 0.75<br>(0.26, 2.14)          | 0.04<br>(0, 0.99)        | 0.74<br>(0.13, 4.07)          | 0.85<br>(0.18, 4.03)          | 0.57<br>(0.17, 1.89)         | <b>VILDA</b>                   |
