# Supplementary material for: Comparative Efficacy and Safety of Antidiabetic Drug Regimens Added to Metformin Monotherapy in Patients with Type 2 Diabetes: A Network Meta-Analysis
Source: PubMed Central journal article supplement (PMC4412636; doi:10.1371/journal.pone.0125879), 2015-04-28
Supplement: pone.0125879.s010.pdf [file pone.0125879.s010.pdf]

**Figure S7. Network Meta-Analysis Results of the Effect of Antidiabetic Therapies on Risk of Urinary Tract Infections**

|                     |                     |                     |                     |                                   |                     |                     |                                   |                     |                     |                     |                                   |                                   |                      |
|---------------------|---------------------|---------------------|---------------------|-----------------------------------|---------------------|---------------------|-----------------------------------|---------------------|---------------------|---------------------|-----------------------------------|-----------------------------------|----------------------|
| <b>ALO/PIO</b>      | 0.83<br>(0.44,1.58) | 0.7<br>(0.29,1.7)   | 0.68<br>(0.28,1.69) | 1.45<br>(0.53,3.98)               | 1.02<br>(0.43,2.4)  | 0.99<br>(0.42,2.32) | 1.6<br>(0.6,4.29)                 | 0.92<br>(0.38,2.23) | 0.62<br>(0.37,1.06) | 0.87<br>(0.41,1.85) | 0.74<br>(0.3,1.78)                | 0.91<br>(0.38,2.17)               | 0.97<br>(0.14,6.63)  |
| 1.21<br>(0.63,2.3)  | <b>ALO</b>          | 0.85<br>(0.36,2)    | 0.82<br>(0.34,1.99) | 1.75<br>(0.65,4.69)               | 1.23<br>(0.54,2.82) | 1.19<br>(0.52,2.72) | 1.93<br>(0.74,5.06)               | 1.11<br>(0.47,2.62) | 0.75<br>(0.39,1.47) | 1.06<br>(0.51,2.17) | 0.89<br>(0.38,2.09)               | 1.1<br>(0.48,2.56)                | 1.18<br>(0.17,7.91)  |
| 1.43<br>(0.59,3.46) | 1.18<br>(0.5,2.79)  | <b>CANA</b>         | 0.97<br>(0.54,1.76) | <b>2.07</b><br><b>(1.03,4.15)</b> | 1.46<br>(0.93,2.27) | 1.41<br>(0.94,2.11) | <b>2.29</b><br><b>(1.17,4.48)</b> | 1.32<br>(0.81,2.15) | 0.89<br>(0.36,2.2)  | 1.25<br>(0.78,2)    | 1.05<br>(0.58,1.89)               | 1.31<br>(0.81,2.11)               | 1.39<br>(0.22,8.65)  |
| 1.47<br>(0.59,3.63) | 1.21<br>(0.5,2.94)  | 1.03<br>(0.57,1.86) | <b>DAPA</b>         | <b>2.12</b><br><b>(1.01,4.47)</b> | 1.5<br>(0.89,2.5)   | 1.45<br>(0.89,2.34) | <b>2.35</b><br><b>(1.07,5.13)</b> | 1.35<br>(0.78,2.36) | 0.92<br>(0.36,2.31) | 1.28<br>(0.77,2.14) | 1.08<br>(0.55,2.11)               | 1.34<br>(0.72,2.5)                | 1.43<br>(0.23,8.98)  |
| 0.69<br>(0.25,1.9)  | 0.57<br>(0.21,1.54) | 0.48<br>(0.24,0.97) | 0.47<br>(0.22,0.99) | <b>EMPA/LINA</b>                  | 0.71<br>(0.4,1.24)  | 0.68<br>(0.38,1.22) | 1.11<br>(0.46,2.67)               | 0.64<br>(0.36,1.14) | 0.43<br>(0.15,1.21) | 0.6<br>(0.31,1.19)  | 0.51<br>(0.23,1.13)               | 0.63<br>(0.3,1.33)                | 0.67<br>(0.1,4.47)   |
| 0.98<br>(0.42,2.31) | 0.81<br>(0.35,1.86) | 0.69<br>(0.44,1.07) | 0.67<br>(0.4,1.12)  | 1.42<br>(0.8,2.5)                 | <b>EMPA</b>         | 0.97<br>(0.77,1.22) | 1.57<br>(0.78,3.15)               | 0.91<br>(0.64,1.28) | 0.61<br>(0.26,1.47) | 0.86<br>(0.57,1.3)  | 0.72<br>(0.4,1.29)                | 0.9<br>(0.54,1.5)                 | 0.96<br>(0.16,5.86)  |
| 1.01<br>(0.43,2.38) | 0.84<br>(0.37,1.92) | 0.71<br>(0.47,1.06) | 0.69<br>(0.43,1.12) | 1.47<br>(0.82,2.63)               | 1.03<br>(0.82,1.3)  | <b>GLIM</b>         | 1.62<br>(0.82,3.23)               | 0.94<br>(0.69,1.28) | 0.63<br>(0.26,1.51) | 0.89<br>(0.59,1.33) | 0.75<br>(0.42,1.33)               | 0.93<br>(0.56,1.53)               | 0.99<br>(0.16,6.05)  |
| 0.62<br>(0.23,1.67) | 0.52<br>(0.2,1.36)  | 0.44<br>(0.22,0.86) | 0.43<br>(0.2,0.93)  | 0.9<br>(0.37,2.18)                | 0.64<br>(0.32,1.28) | 0.62<br>(0.31,1.23) | <b>GLIP</b>                       | 0.58<br>(0.28,1.2)  | 0.39<br>(0.14,1.06) | 0.55<br>(0.29,1.04) | <b>0.46</b><br><b>(0.24,0.89)</b> | <b>0.57</b><br><b>(0.36,0.91)</b> | 0.61<br>(0.09,3.98)  |
| 1.08<br>(0.45,2.61) | 0.9<br>(0.38,2.11)  | 0.76<br>(0.46,1.24) | 0.74<br>(0.42,1.28) | 1.57<br>(0.88,2.8)                | 1.1<br>(0.78,1.56)  | 1.07<br>(0.78,1.46) | 1.73<br>(0.84,3.59)               | <b>LINA</b>         | 0.68<br>(0.28,1.66) | 0.95<br>(0.6,1.5)   | 0.8<br>(0.43,1.48)                | 0.99<br>(0.57,1.73)               | 1.05<br>(0.17,6.54)  |
| 1.6<br>(0.94,2.72)  | 1.33<br>(0.68,2.58) | 1.12<br>(0.45,2.76) | 1.09<br>(0.43,2.75) | 2.32<br>(0.83,6.47)               | 1.63<br>(0.68,3.92) | 1.58<br>(0.66,3.78) | 2.56<br>(0.94,6.98)               | 1.48<br>(0.6,3.63)  | <b>PIO</b>          | 1.4<br>(0.65,3.02)  | 1.18<br>(0.48,2.9)                | 1.46<br>(0.6,3.54)                | 1.56<br>(0.23,10.71) |
| 1.14<br>(0.54,2.42) | 0.95<br>(0.46,1.94) | 0.8<br>(0.5,1.28)   | 0.78<br>(0.47,1.3)  | 1.65<br>(0.84,3.26)               | 1.17<br>(0.77,1.77) | 1.13<br>(0.75,1.7)  | 1.83<br>(0.97,3.47)               | 1.06<br>(0.67,1.67) | 0.71<br>(0.33,1.54) | <b>PLC</b>          | 0.84<br>(0.53,1.34)               | 1.05<br>(0.68,1.61)               | 1.11<br>(0.19,6.51)  |
| 1.36<br>(0.56,3.28) | 1.13<br>(0.48,2.65) | 0.95<br>(0.53,1.71) | 0.93<br>(0.47,1.81) | 1.96<br>(0.89,4.34)               | 1.39<br>(0.77,2.48) | 1.34<br>(0.75,2.38) | 2.17<br>(1.13,4.2)                | 1.25<br>(0.68,2.33) | 0.85<br>(0.34,2.09) | 1.19<br>(0.75,1.89) | <b>SAX</b>                        | 1.24<br>(0.78,1.97)               | 1.32<br>(0.21,8.22)  |
| 1.09<br>(0.46,2.6)  | 0.91<br>(0.39,2.1)  | 0.77<br>(0.47,1.24) | 0.75<br>(0.4,1.39)  | 1.58<br>(0.75,3.33)               | 1.12<br>(0.67,1.86) | 1.08<br>(0.65,1.78) | 1.75<br>(1.09,2.8)                | 1.01<br>(0.58,1.76) | 0.68<br>(0.28,1.65) | 0.96<br>(0.62,1.48) | 0.81<br>(0.51,1.27)               | <b>SITA</b>                       | 1.07<br>(0.17,6.57)  |
| 1.03<br>(0.15,6.98) | 0.85<br>(0.13,5.72) | 0.72<br>(0.12,4.47) | 0.7<br>(0.11,4.4)   | 1.48<br>(0.22,9.84)               | 1.05<br>(0.17,6.42) | 1.01<br>(0.17,6.2)  | 1.64<br>(0.25,10.74)              | 0.95<br>(0.15,5.88) | 0.64<br>(0.09,4.4)  | 0.9<br>(0.15,5.24)  | 0.76<br>(0.12,4.69)               | 0.94<br>(0.15,5.78)               | <b>VILDA</b>         |
