# Supplementary material for: Comparative Efficacy and Safety of Antidiabetic Drug Regimens Added to Metformin Monotherapy in Patients with Type 2 Diabetes: A Network Meta-Analysis
Source: PubMed Central journal article supplement (PMC4412636; doi:10.1371/journal.pone.0125879), 2015-04-28
Supplement: pone.0125879.s011.pdf [file pone.0125879.s011.pdf]

Figure S8. Network Meta-Analysis Results of the Effect of Antidiabetic Therapies on Risk of Genital Tract Infections

|                      |                       |                      |                      |                       |                        |                        |                       |                      |
|----------------------|-----------------------|----------------------|----------------------|-----------------------|------------------------|------------------------|-----------------------|----------------------|
| <b>CANA</b>          | 3.72<br>(0.88, 15.62) | 2.72<br>(0.9, 8.17)  | 1.17<br>(0.55, 2.49) | 6.25<br>(3.28, 11.91) | 16.99<br>(3.52, 82.08) | 10.49<br>(1.24, 88.76) | 8.03<br>(2.44, 26.39) | 3.44<br>(1.61, 7.35) |
| 0.27<br>(0.06, 1.13) | <b>DAPA</b>           | 0.73<br>(0.13, 4.02) | 0.32<br>(0.07, 1.42) | 1.68<br>(0.38, 7.51)  | 4.57<br>(2.39, 8.73)   | 2.82<br>(0.23, 34.43)  | 2.16<br>(0.97, 4.82)  | 0.93<br>(0.2, 4.37)  |
| 0.37<br>(0.12, 1.11) | 1.37<br>(0.25, 7.52)  | <b>EMPA/LINA</b>     | 0.43<br>(0.19, 0.96) | 2.3<br>(0.9, 5.89)    | 6.25<br>(1.01, 38.7)   | 3.86<br>(0.48, 30.8)   | 2.95<br>(0.66, 13.28) | 1.27<br>(0.37, 4.36) |
| 0.85<br>(0.4, 1.81)  | 3.17<br>(0.7, 14.24)  | 2.32<br>(1.04, 5.17) | <b>EMPA</b>          | 5.33<br>(3.27, 8.67)  | 14.48<br>(2.82, 74.39) | 8.94<br>(1.21, 65.97)  | 6.84<br>(1.92, 24.37) | 2.93<br>(1.15, 7.5)  |
| 0.16<br>(0.08, 0.3)  | 0.59<br>(0.13, 2.65)  | 0.43<br>(0.17, 1.11) | 0.19<br>(0.12, 0.31) | <b>GLIM</b>           | 2.72<br>(0.53, 13.86)  | 1.68<br>(0.21, 13.13)  | 1.28<br>(0.36, 4.53)  | 0.55<br>(0.22, 1.36) |
| 0.06<br>(0.01, 0.28) | 0.22<br>(0.11, 0.42)  | 0.16<br>(0.03, 0.99) | 0.07<br>(0.01, 0.35) | 0.37<br>(0.07, 1.88)  | <b>GLIP</b>            | 0.62<br>(0.05, 8.18)   | 0.47<br>(0.17, 1.33)  | 0.2<br>(0.04, 1.09)  |
| 0.1<br>(0.01, 0.81)  | 0.35<br>(0.03, 4.32)  | 0.26<br>(0.03, 2.07) | 0.11<br>(0.02, 0.83) | 0.6<br>(0.08, 4.67)   | 1.62<br>(0.12, 21.46)  | <b>LINA</b>            | 0.77<br>(0.07, 8.18)  | 0.33<br>(0.04, 2.99) |
| 0.12<br>(0.04, 0.41) | 0.46<br>(0.21, 1.03)  | 0.34<br>(0.08, 1.52) | 0.15<br>(0.04, 0.52) | 0.78<br>(0.22, 2.75)  | 2.12<br>(0.75, 5.94)   | 1.31<br>(0.12, 13.96)  | <b>PLC</b>            | 0.43<br>(0.11, 1.62) |
| 0.29<br>(0.14, 0.62) | 1.08<br>(0.23, 5.1)   | 0.79<br>(0.23, 2.72) | 0.34<br>(0.13, 0.87) | 1.82<br>(0.73, 4.5)   | 4.94<br>(0.92, 26.53)  | 3.05<br>(0.33, 27.76)  | 2.33<br>(0.62, 8.8)   | <b>SITA</b>          |
