# Supplementary material for: Comparative Efficacy and Safety of Antidiabetic Drug Regimens Added to Metformin Monotherapy in Patients with Type 2 Diabetes: A Network Meta-Analysis
Source: PubMed Central journal article supplement (PMC4412636; doi:10.1371/journal.pone.0125879), 2015-04-28
Supplement: pone.0125879.s012.pdf [file pone.0125879.s012.pdf]

Figure S9. Sensitivity Analysis Results of the Effect of Antidiabetic Therapies on Change in HbA1c From Baseline

|                       |                        |                       |                        |                        |                        |                        |                       |                        |                       |                      |                        |                       |                        |                        |                        |                        |                        |                        |                        |                        |                       |                        |                        |                        |                        |
|-----------------------|------------------------|-----------------------|------------------------|------------------------|------------------------|------------------------|-----------------------|------------------------|-----------------------|----------------------|------------------------|-----------------------|------------------------|------------------------|------------------------|------------------------|------------------------|------------------------|------------------------|------------------------|-----------------------|------------------------|------------------------|------------------------|------------------------|
| ACA                   | -0.21<br>(-0.69,0.26)  | 0.45<br>(-0.04,0.94)  | -0.07<br>(-0.50,0.37)  | -0.29<br>(-0.91,0.33)  | -0.31<br>(-0.75,0.14)  | -0.1<br>(-0.53,0.33)   | 0.34<br>(-0.15,0.84)  | 0.01<br>(-0.42,0.45)   | 0.45<br>(-0.08,0.98)  | 0.5<br>(-0.36,1.36)  | -0.08<br>(-0.53,0.36)  | -0.06<br>(-0.48,0.36) | -0.23<br>(-0.67,0.2)   | -0.14<br>(-0.58,0.29)  | 0.07<br>(-0.37,0.52)   | -0.22<br>(-0.7,0.26)   | -0.36<br>(-0.95,0.23)  | -0.3<br>(-0.78,0.17)   | -0.1<br>(-0.54,0.35)   | -0.79<br>(-1.19,-0.38) | 0.29<br>(-0.68,1.26)  | -0.03<br>(-0.48,0.41)  | -0.28<br>(-0.71,0.15)  | -0.14<br>(-0.56,0.27)  | -0.16<br>(-0.58,0.26)  |
| 0.21<br>(-0.26,0.69)  | ALO                    | 0.66<br>(0.37,0.96)   | 0.15<br>(-0.15,0.44)   | -0.08<br>(-0.6,0.45)   | -0.09<br>(-0.41,0.22)  | 0.11<br>(-0.18,0.44)   | 0.56<br>(0.18,0.93)   | 0.23<br>(-0.07,0.53)   | 0.66<br>(0.24,1.08)   | 0.71<br>(0.27,1.15)  | 0.13<br>(-0.17,0.43)   | 0.16<br>(-0.12,0.43)  | -0.02<br>(-0.33,0.28)  | 0.07<br>(-0.23,0.37)   | 0.29<br>(-0.02,0.6)    | -0.01<br>(-0.37,0.35)  | -0.14<br>(-0.64,0.36)  | -0.09<br>(-0.44,0.26)  | 0.12<br>(-0.15,0.38)   | -0.57<br>(-0.82,-0.32) | 0.51<br>(-0.41,1.42)  | 0.18<br>(-0.13,0.49)   | -0.07<br>(-0.36,0.23)  | 0.07<br>(-0.19,0.37)   | 0.05<br>(-0.23,0.33)   |
| -0.45<br>(-0.94,0.04) | -0.66<br>(-0.96,-0.37) | ALO/PIO               | -0.52<br>(-0.84,-0.2)  | -0.74<br>(-1.28,-0.2)  | -0.76<br>(-1.09,-0.42) | -0.55<br>(-0.86,-0.23) | -0.11<br>(-0.5,0.29)  | -0.44<br>(-0.76,-0.12) | -0.01<br>(-0.44,0.43) | 0.05<br>(-0.94,1.04) | -0.51<br>(-0.85,-0.21) | -0.51<br>(-0.8,-0.22) | -0.69<br>(-1.01,-0.36) | -0.59<br>(-0.91,-0.27) | -0.38<br>(-0.71,-0.05) | -0.67<br>(-1.05,-0.3)  | -0.81<br>(-1.32,-0.29) | -0.75<br>(-1.12,-0.39) | -0.55<br>(-0.82,-0.28) | -1.24<br>(-1.52,-0.96) | -0.16<br>(-1.08,0.77) | -0.49<br>(-0.82,-0.15) | -0.73<br>(-1.04,-0.42) | -0.6<br>(-0.88,-0.31)  | -0.61<br>(-0.91,-0.31) |
| 0.07<br>(-0.37,0.5)   | -0.15<br>(-0.44,0.15)  | 0.52<br>(0.2,0.84)    | CANA                   | -0.22<br>(-0.71,0.26)  | -0.24<br>(-0.49,0.01)  | -0.03<br>(-0.25,0.18)  | 0.41<br>(0.09,0.73)   | 0.08<br>(-0.15,0.31)   | 0.51<br>(0.14,0.88)   | 0.57<br>(-0.4,1.53)  | -0.02<br>(-0.26,0.23)  | 0.01<br>(-0.16,0.18)  | -0.17<br>(-0.4,0.06)   | -0.08<br>(-0.3,0.15)   | 0.14<br>(-0.1,0.38)    | -0.16<br>(-0.46,0.15)  | -0.29<br>(-0.75,0.17)  | -0.24<br>(-0.53,0.06)  | -0.03<br>(-0.26,0.2)   | -0.88<br>(-0.88,-0.55) | 0.36<br>(-0.54,1.26)  | 0.03<br>(-0.22,0.28)   | -0.21<br>(-0.43,0)     | -0.08<br>(-0.24,0.09)  | -0.09<br>(-0.29,0.1)   |
| 0.29<br>(-0.33,0.91)  | 0.08<br>(-0.45,0.6)    | 0.74<br>(0.2,1.28)    | 0.22<br>(-0.26,0.71)   | COL                    | -0.02<br>(-0.52,0.48)  | 0.19<br>(-0.3,0.68)    | 0.63<br>(0.09,1.18)   | 0.3<br>(-0.19,0.79)    | 0.74<br>(0.17,1.3)    | 0.79<br>(-0.27,1.85) | 0.21<br>(-0.28,0.69)   | 0.23<br>(-0.24,0.71)  | 0.05<br>(-0.44,0.55)   | 0.15<br>(-0.34,0.64)   | 0.36<br>(-0.13,0.86)   | 0.07<br>(-0.47,0.6)    | -0.07<br>(-0.7,0.57)   | -0.01<br>(-0.54,0.51)  | 0.19<br>(-0.3,0.68)    | -0.5<br>(-0.96,-0.03)  | 0.58<br>(-0.21,1.25)  | 0.25<br>(-0.47,0.5)    | 0.01<br>(-0.47,0.5)    | 0.15<br>(-0.32,0.61)   | 0.13<br>(-0.35,0.61)   |
| 0.31<br>(-0.14,0.75)  | 0.09<br>(-0.22,0.41)   | 0.76<br>(0.42,1.09)   | 0.24<br>(-0.01,0.49)   | 0.02<br>(-0.48,0.52)   | DAPA                   | 0.21<br>(-0.04,0.45)   | 0.65<br>(0.31,0.99)   | 0.32<br>(0.07,0.57)    | 0.75<br>(0.36,1.14)   | 0.81<br>(-0.16,1.77) | 0.22<br>(-0.05,0.49)   | 0.25<br>(0.03,0.47)   | 0.07<br>(-0.13,0.28)   | 0.16<br>(-0.09,0.42)   | 0.38<br>(0.11,0.65)    | 0.08<br>(-0.24,0.4)    | -0.05<br>(-0.52,0.42)  | 0<br>(-0.31,0.32)      | 0.21<br>(-0.05,0.47)   | -0.48<br>(-0.67,-0.29) | 0.6<br>(-0.3,1.5)     | 0.27<br>(0,0.54)       | 0.03<br>(-0.2,0.26)    | 0.16<br>(-0.04,0.37)   | 0.15<br>(-0.08,0.37)   |
| 0.1<br>(-0.33,0.53)   | -0.11<br>(-0.41,0.18)  | 0.55<br>(0.23,0.86)   | 0.03<br>(-0.18,0.25)   | -0.19<br>(-0.68,0.3)   | -0.21<br>(-0.45,0.04)  | EMPA                   | 0.44<br>(0.18,0.71)   | 0.11<br>(-0.11,0.33)   | 0.54<br>(0.17,0.92)   | 0.02<br>(-0.36,1.56) | 0.04<br>(-0.23,0.26)   | -0.14<br>(-0.12,0.2)  | -0.04<br>(-0.37,0.09)  | 0.17<br>(-0.06,0.41)   | -0.12<br>(-0.42,0.17)  | -0.26<br>(-0.72,0.2)   | -0.2<br>(-0.5,0.9)     | 0<br>(-0.23,0.23)      | -0.69<br>(-0.84,-0.53) | 0.39<br>(-0.5,1.29)    | 0.06<br>(-0.18,0.31)  | -0.18<br>(-0.39,0.03)  | -0.05<br>(-0.21,0.12)  | -0.08<br>(-0.25,0.13)  | -0.06<br>(-0.28,0.16)  |
| -0.34<br>(-0.84,0.15) | -0.56<br>(-0.93,-0.18) | 0.11<br>(-0.29,0.5)   | -0.41<br>(-0.73,-0.09) | -0.63<br>(-1.18,-0.09) | -0.65<br>(-0.99,-0.31) | -0.44<br>(-0.71,-0.18) | EMPA/LINA             | -0.33<br>(-0.65,-0.01) | 0.17<br>(-0.34,0.54)  | 0.16<br>(-0.83,1.14) | -0.43<br>(-0.76,-0.09) | -0.4<br>(-0.69,-0.12) | -0.58<br>(-0.91,-0.25) | -0.49<br>(-0.76,-0.22) | -0.27<br>(-0.6,0.06)   | -0.57<br>(-0.95,-0.19) | -0.7<br>(-1.22,-0.19)  | -0.65<br>(-1.02,-0.27) | -0.44<br>(-0.77,-0.11) | -1.13<br>(-1.41,-0.85) | -0.05<br>(-0.98,0.88) | -0.38<br>(-0.72,-0.04) | -0.49<br>(-0.94,-0.31) | -0.49<br>(-0.78,-0.2)  | -0.5<br>(-0.81,-0.2)   |
| -0.01<br>(-0.45,0.42) | -0.23<br>(-0.53,0.07)  | 0.44<br>(0.12,0.76)   | -0.08<br>(-0.31,0.15)  | -0.3<br>(-0.57,-0.19)  | -0.32<br>(-0.57,-0.07) | -0.11<br>(-0.33,0.11)  | 0.33<br>(0.01,0.65)   | EXEN                   | 0.43<br>(0.05,0.81)   | 0.49<br>(-0.47,1.45) | -0.15<br>(-0.35,0.15)  | -0.07<br>(-0.25,0.11) | -0.25<br>(-0.49,-0.01) | -0.15<br>(-0.38,0.07)  | 0.06<br>(-0.39,0.31)   | -0.24<br>(-0.48,0.01)  | -0.37<br>(-0.83,0.09)  | -0.32<br>(-0.62,-0.02) | -0.11<br>(-0.3,0.13)   | -0.8<br>(-0.96,-0.63)  | 0.28<br>(-0.62,1.18)  | -0.05<br>(-0.3,0.21)   | -0.29<br>(-0.51,-0.07) | -0.16<br>(-0.34,0.03)  | -0.17<br>(-0.37,0.03)  |
| -0.45<br>(-0.98,0.08) | -0.66<br>(-1.08,-0.24) | 0.01<br>(-0.43,0.44)  | -0.51<br>(-0.88,-0.14) | -0.74<br>(-1.3,-0.17)  | -0.75<br>(-1.14,-0.36) | -0.54<br>(-0.92,-0.17) | -0.1<br>(-0.54,0.34)  | -0.43<br>(-0.81,-0.05) | GLAR                  | 0.05<br>(-0.95,1.06) | -0.53<br>(-0.92,-0.14) | -0.5<br>(-0.86,-0.15) | -0.68<br>(-1.06,-0.3)  | -0.59<br>(-0.97,-0.21) | -0.37<br>(-0.75,0.02)  | -0.67<br>(-1.1,0.24)   | -0.8<br>(-1.35,-0.25)  | -0.75<br>(-1.17,-0.32) | -0.54<br>(-0.92,-0.16) | -1.23<br>(-1.58,-0.89) | -0.15<br>(-1.1,0.8)   | -0.48<br>(-0.87,-0.09) | -0.72<br>(-1.09,-0.36) | -0.59<br>(-0.92,-0.26) | -0.61<br>(-0.97,-0.24) |
| -0.5<br>(-1.36,0.36)  | -0.71<br>(-1.69,0.27)  | -0.05<br>(-1.04,0.94) | -0.57<br>(-1.53,0.4)   | -0.79<br>(-1.85,0.27)  | -0.81<br>(-1.77,0.16)  | -0.6<br>(-1.56,0.36)   | -0.16<br>(-1.14,0.83) | -0.49<br>(-1.45,0.47)  | -0.05<br>(-1.06,0.95) | GLIB                 | -0.58<br>(-1.55,-0.38) | -0.56<br>(-1.51,0.4)  | -0.73<br>(-1.7,0.23)   | -0.64<br>(-1.6,0.32)   | -0.43<br>(-1.39,0.54)  | -0.72<br>(-1.71,0.26)  | -0.86<br>(-1.9,0.19)   | -0.8<br>(-1.78,0.18)   | -0.6<br>(-1.56,0.37)   | -1.29<br>(-2.23,-0.34) | -0.21<br>(-1.5,1.09)  | -0.53<br>(-1.5,0.43)   | -0.78<br>(-1.74,0.18)  | -0.64<br>(-1.6,0.31)   | -0.66<br>(-1.62,0.3)   |
| 0.08<br>(-0.36,0.53)  | -0.13<br>(-0.43,0.17)  | 0.53<br>(0.21,0.85)   | 0.02<br>(-0.23,0.26)   | -0.21<br>(-0.69,0.28)  | -0.22<br>(-0.49,0.05)  | -0.02<br>(-0.26,0.23)  | 0.43<br>(0.09,0.76)   | 0.1<br>(-0.15,0.35)    | 0.53<br>(0.14,0.92)   | 0.58<br>(-0.38,1.55) | GLIC                   | 0.03<br>(-0.18,0.24)  | -0.15<br>(-0.41,0.1)   | -0.06<br>(-0.31,0.19)  | 0.16<br>(-0.1,0.42)    | -0.14<br>(-0.46,0.18)  | -0.27<br>(-0.74,0.2)   | -0.48<br>(-0.82,0.04)  | -0.22<br>(-0.23,0.21)  | -0.7<br>(-0.9,0.51)    | 0.39<br>(-0.53,1.28)  | 0.05<br>(-0.16,0.25)   | -0.19<br>(-0.43,0.05)  | -0.06<br>(-0.26,0.14)  | -0.08<br>(-0.28,0.13)  |
| 0.06<br>(-0.36,0.48)  | -0.16<br>(-0.43,0.12)  | 0.51<br>(0.22,0.8)    | -0.01<br>(-0.18,0.16)  | -0.23<br>(-0.47,0.24)  | -0.25<br>(-0.47,-0.03) | -0.04<br>(-0.2,0.12)   | 0.4<br>(0.12,0.69)    | 0.07<br>(-0.11,0.25)   | 0.5<br>(0.15,0.86)    | 0.56<br>(-0.4,1.51)  | -0.03<br>(-0.24,0.18)  | GLIM                  | -0.08<br>(-0.38,0.03)  | -0.08<br>(-0.25,0.09)  | 0.13<br>(-0.07,0.33)   | -0.17<br>(-0.44,0.11)  | -0.3<br>(-0.75,0.15)   | -0.25<br>(-0.52,0.03)  | -0.04<br>(-0.23,0.15)  | -0.73<br>(-0.85,-0.61) | 0.35<br>(-0.54,1.24)  | 0.02<br>(-0.2,0.24)    | -0.22<br>(-0.4,-0.04)  | -0.09<br>(-0.21,0.04)  | -0.1<br>(-0.24,0.04)   |
| 0.23<br>(-0.2,0.67)   | 0.02<br>(-0.28,0.33)   | 0.69<br>(0.36,1.01)   | 0.17<br>(-0.06,0.4)    | -0.05<br>(-0.55,0.44)  | -0.07<br>(-0.28,0.13)  | 0.14<br>(-0.09,0.37)   | 0.58<br>(0.25,0.91)   | 0.25<br>(0.01,0.49)    | 0.68<br>(0.3,1.06)    | 0.73<br>(-0.23,1.7)  | 0.15<br>(-0.1,0.41)    | 0.18<br>(-0.03,0.38)  | GLIP                   | 0.09<br>(-0.15,0.33)   | 0.31<br>(0.06,0.56)    | 0.01<br>(-0.3,0.32)    | -0.12<br>(-0.59,0.34)  | -0.07<br>(-0.37,0.24)  | 0.14<br>(-0.11,0.38)   | -0.55<br>(-0.73,-0.38) | 0.53<br>(-0.37,1.43)  | 0.2<br>(-0.06,0.46)    | -0.04<br>(-0.23,0.15)  | 0.09<br>(-0.09,0.27)   | 0.07<br>(-0.14,0.29)   |
| 0.14<br>(-0.29,0.58)  | -0.07<br>(-0.37,0.23)  | 0.59<br>(0.27,0.91)   | 0.08<br>(-0.15,-0.3)   | -0.15<br>(-0.64,0.34)  | -0.16<br>(-0.42,0.09)  | 0.04<br>(-0.14,0.23)   | 0.49<br>(0.22,0.76)   | 0.15<br>(-0.07,0.38)   | 0.59<br>(0.21,0.97)   | 0.64<br>(-0.32,1.6)  | 0.06<br>(-0.19,0.31)   | 0.08<br>(-0.09,0.25)  | -0.09<br>(-0.33,0.15)  | LINA                   | 0.22<br>(-0.03,0.46)   | -0.08<br>(-0.38,0.22)  | -0.21<br>(-0.68,0.25)  | -0.16<br>(-0.46,0.14)  | 0.05<br>(-0.19,0.28)   | -0.81<br>(-0.81,-0.48) | 0.44<br>(-0.46,1.33)  | 0.11<br>(-0.15,0.36)   | 0<br>(-0.36,0.09)      | 0<br>(-0.19,0.18)      | -0.02<br>(-0.22,0.18)  |
| -0.07<br>(-0.52,0.37) | -0.29<br>(-0.6,0.02)   | 0.38<br>(0.05,0.71)   | -0.14<br>(-0.38,0.1)   | -0.36<br>(-0.86,0.13)  | -0.38<br>(-0.65,-0.11) | -0.17<br>(-0.41,0.06)  | 0.27<br>(-0.06,0.6)   | -0.06<br>(-0.31,0.19)  | 0.37<br>(-0.01,0.75)  | 0.43<br>(-0.54,1.39) | -0.16<br>(-0.42,0.1)   | -0.13<br>(-0.33,0.07) | -0.31<br>(-0.56,-0.06) | -0.22<br>(-0.46,0.03)  | LIRA                   | -0.3<br>(-0.61,0.02)   | -0.43<br>(-0.9,0.04)   | -0.38<br>(-0.69,-0.06) | -0.17<br>(-0.42,0.08)  | -0.86<br>(-1.05,-0.67) | 0.22<br>(-0.68,1.12)  | -0.11<br>(-0.37,0.15)  | -0.35<br>(-0.59,-0.12) | -0.22<br>(-0.4,-0.04)  | -0.23<br>(-0.45,-0.01) |
| 0.22<br>(-0.26,0.7)   | 0.01<br>(-0.35,0.37)   | 0.67<br>(0.3,1.05)    | 0.16<br>(-0.15,0.46)   | -0.07<br>(-0.4,0.24)   | -0.08<br>(-0.17,0.42)  | 0.12<br>(-0.17,0.42)   | 0.57<br>(0.19,0.95)   | 0.24<br>(-0.01,0.48)   | 0.67<br>(0.24,1.1)    | 0.72<br>(-0.26,1.71) | 0.14<br>(-0.18,0.46)   | 0.17<br>(-0.11,0.44)  | -0.01<br>(-0.32,0.3)   | 0.08<br>(-0.22,0.38)   | 0.3<br>(-0.02,0.61)    | LIX                    | -0.13<br>(-0.64,0.37)  | -0.08<br>(-0.44,0.28)  | 0.13<br>(-0.19,0.44)   | -0.56<br>(-0.82,-0.3)  | 0.52<br>(-0.4,1.44)   | 0.19<br>(-0.13,0.51)   | -0.06<br>(-0.35,0.24)  | 0.08<br>(-0.19,0.35)   | 0.06<br>(-0.22,0.35)   |
| 0.36<br>(-0.23,0.95)  | 0.14<br>(-0.36,0.64)   | 0.81<br>(0.29,1.32)   | 0.29<br>(-0.17,0.75)   | 0.07<br>(-0.57,0.7)    | 0.05<br>(-0.42,0.52)   | 0.26<br>(-0.2,0.72)    | 0.7<br>(0.19,1.22)    | 0.37<br>(-0.09,0.83)   | 0.8<br>(0.25,1.35)    | 0.86<br>(-0.19,1.9)  | 0.27<br>(-0.2,0.74)    | 0.3<br>(-0.15,0.75)   | 0.12<br>(-0.34,0.59)   | 0.21<br>(-0.25,0.68)   | 0.43<br>(-0.04,0.9)    | 0.13<br>(-0.37,0.64)   | MIG                    | 0.05<br>(-0.45,0.55)   | 0.26<br>(-0.21,0.73)   | -0.43<br>(-0.86,0)     | 0.65<br>(-0.33,1.63)  | 0.32<br>(-0.15,0.8)    | 0.08<br>(-0.38,0.53)   | 0.21<br>(-0.23,0.65)   | 0.2<br>(-0.25,0.65)    |
| 0.3<br>(-0.17,0.78)   | 0.09<br>(-0.26,0.44)   | 0.75<br>(0.39,1.12)   | 0.24<br>(-0.06,0.53)   | 0.01<br>(-0.51,0.54)   | 0<br>(-0.32,0.31)      | 0.02<br>(-0.09,0.5)    | 0.7<br>(0.27,1.02)    | 0.32<br>(0.02,0.62)    | 0.75<br>(0.32,1.17)   | 0.8<br>(-0.18,1.78)  | 0.22<br>(-0.04,0.48)   | 0.25<br>(0.03,0.52)   | 0.07<br>(-0.24,0.37)   | 0.16<br>(-0.14,0.46)   | 0.38<br>(0.06,0.69)    | 0.08<br>(-0.28,0.44)   | -0.05<br>(-0.55,0.45)  | NAT                    | 0.21<br>(-0.09,0.5)    | 0.6<br>(-0.74,-0.23)   | 0.65<br>(-0.32,1.51)  | 0.27<br>(-0.03,0.57)   | 0.02<br>(-0.27,0.32)   | 0.16<br>(-0.11,0.42)   | 0.14<br>(-0.13,0.42)   |
| 0.1<br>(-0.35,0.54)   | -0.12<br>(-0.38,0.15)  | 0.55<br>(0.28,0.82)   | 0.03<br>(-0.2,0.26)    | -0.19<br>(-0.68,0.3)   | -0.21<br>(-0.47,0.05)  | 0<br>(-0.23,0.23)      | 0.44<br>(0.11,0.77)   | 0.11<br>(-0.13,0.35)   | 0.54<br>(0.16,0.92)   | 0.6<br>(-0.37,1.56)  | 0.01<br>(-0.21,0.23)   | 0.04<br>(-0.15,0.23)  | -0.14<br>(-0.38,0.11)  | -0.05<br>(-0.28,0.19)  | 0.17<br>(-0.08,0.42)   | -0.13<br>(-0.44,0.19)  | -0.26<br>(-0.73,0.21)  | -0.21<br>(-0.5,0.09)   | PIO                    | -0.69<br>(-0.87,-0.51) | 0.06<br>(-0.18,0.31)  | -0.18<br>(-0.41,0.05)  | -0.05<br>(-0.23,0.14)  | -0.06<br>(-0.27,0.14)  |                        |
| 0.79<br>(0.38,1.19)   | 0.57<br>(0.32,0.82)    | 1.24<br>(0.96,1.52)   | 0.72<br>(0.55,0.88)    | 0.5<br>(0.03,0.96)     | 0.48<br>(0.29,0.67)    | 0.69<br>(0.53,0.84)    | 1.13<br>(0.85,1.41)   | 0.8<br>(0.63,0.96)     | 1.23<br>(0.89,1.58)   | 1.29<br>(0.34,2.23)  | 0.7<br>(0.51,0.9)      | 0.73<br>(0.61,0.85)   | 0.55<br>(0.38,0.73)    | 0.64<br>(0.48,0.81)    | 0.86<br>(0.67,1.05)    | 0.56<br>(0.3,0.82)     | 0.43<br>(0.08,0.86)    | 0.48<br>(0.23,0.74)    | 0.69<br>(0.51,0.87)    | PLC                    | 1.08<br>(0.2,1.96)    | 0.75<br>(0.55,0.95)    | 0.51<br>(0.36,0.66)    | 0.64<br>(0.55,0.74)    | 0.63<br>(0.5,0.75)     |
| -0.29<br>(-1.26,0.68) | -0.51<br>(-1.42,0.41)  | 0.16<br>(-0.77,0.45)  | -0.36<br>(-1.26,0.54)  | -0.58<br>(-1.58,0.41)  | -0.6<br>(-1.5,0.3)     | -0.39<br>(-1.29,0.5)   | 0.05<br>(-0.88,0.98)  | -0.28<br>(-1.18,0.62)  | 0.15<br>(-0.8,1.1)    | 0.21<br>(-1.09,1.5)  | -0.38<br>(-1.28,0.53)  | -0.35<br>(-1.24,0.54) | -0.53<br>(-1.43,0.37)  | -0.44<br>(-1.33,0.46)  | -0.22<br>(-1.12,0.68)  | -0.52<br>(-1.44,0.4)   | -0.65<br>(-1.63,0.33)  | -0.6<br>(-1.51,0.32)   | -0.39<br>(-1.29,0.51)  | -1.08<br>(-1.96,-0.2)  | REP                   | -0.33<br>(-1.23,0.58)  | -0.57<br>(-1.47,0.32)  | -0.44<br>(-1.33,0.45)  | -0.45<br>(-1.35,0.44)  |
| 0.03<br>(-0.41,0.48)  | -0.18<br>(-0.49,0.13)  | 0.49<br>(0.15,0.82)   | -0.03<br>(-0.28,0.22)  | -0.25<br>(-0.72,0.21)  | -0.27<br>(-0.54,0)     | -0.06<br>(-0.31,0.18)  | 0.38<br>(0.04,0.72)   | 0.05<br>(-0.21         |                       |                      |                        |                       |                        |                        |                        |                        |                        |                        |                        |                        |                       |                        |                        |                        |                        |
