# Supplementary material for: Comparative Efficacy and Safety of Antidiabetic Drug Regimens Added to Metformin Monotherapy in Patients with Type 2 Diabetes: A Network Meta-Analysis
Source: PubMed Central journal article supplement (PMC4412636; doi:10.1371/journal.pone.0125879), 2015-04-28
Supplement: pone.0125879.s013.pdf [file pone.0125879.s013.pdf]

Figure S10. Sensitivity Analysis Results of the Effect of Antidiabetic Therapies on Change in Body Weight From Baseline

|                        |                        |                        |                       |                        |                       |                       |                       |                      |                        |                        |                        |                        |                        |                        |                       |                        |                       |                        |                        |                        |                        |                        |                        |                        |                        |
|------------------------|------------------------|------------------------|-----------------------|------------------------|-----------------------|-----------------------|-----------------------|----------------------|------------------------|------------------------|------------------------|------------------------|------------------------|------------------------|-----------------------|------------------------|-----------------------|------------------------|------------------------|------------------------|------------------------|------------------------|------------------------|------------------------|------------------------|
| ACA                    | -2.49<br>(-4.25,-0.73) | -0.19<br>(-1.81,1.41)  | 2.05<br>(0.54,3.57)   | -0.99<br>(-2.9,0.92)   | 2.07<br>(0.49,3.66)   | 1.97<br>(0.37,3.77)   | 1.98<br>(0.48,3.47)   | 2.16<br>(0.36,3.97)  | -2.3<br>(-4.13,-0.47)  | -1.29<br>(-3.03,0.44)  | -2.29<br>(-3.74,-0.83) | -2.54<br>(-4.1,-0.98)  | -1.83<br>(-3.68,0.01)  | -0.06<br>(-1.63,1.52)  | 1.5<br>(-0.04,3.04)   | 1.05<br>(-0.76,2.87)   | 1.7<br>(-0.37,3.77)   | -0.7<br>(-2.44,1.04)   | -2.16<br>(-3.86,-0.47) | -0.1<br>(-1.48,1.28)   | -3.37<br>(-5.81,-0.93) | -2.25<br>(-3.78,-0.73) | -0.16<br>(-1.69,1.37)  | -0.31<br>(-1.75,1.13)  | -0.14<br>(-1.62,1.34)  |
| 2.49<br>(0.73,4.25)    | ALO/PIO                | 2.3<br>(1.23,3.37)     | 4.54<br>(3.29,5.79)   | 1.5<br>(-0.21,3.21)    | 4.56<br>(3.21,5.92)   | 4.46<br>(2.88,6.04)   | 4.46<br>(3.24,5.69)   | 4.65<br>(3.05,6.25)  | 0.19<br>(-2.35,2.73)   | 1.2<br>(-0.31,2.71)    | 0.2<br>(-0.95,1.35)    | -0.05<br>(-1.37,1.27)  | 0.66<br>(-0.98,2.29)   | 2.43<br>(1.12,3.75)    | 3.99<br>(2.71,5.27)   | 3.54<br>(1.93,5.15)    | 4.19<br>(2.29,6.09)   | 1.79<br>(0.27,3.31)    | 0.33<br>(-0.71,3.36)   | 2.39<br>(1.29,3.49)    | -0.88<br>(-3.18,1.42)  | 0.24<br>(-1.04,1.51)   | 2.33<br>(1.05,3.61)    | 2.18<br>(1.02,3.34)    | 2.35<br>(1.14,3.56)    |
| 0.19<br>(-1.41,-1.05)  | -2.3<br>(-3.37,-1.23)  | ALO                    | 2.25<br>(1.22,3.27)   | -0.8<br>(-2.35,0.75)   | 2.27<br>(1.13,3.41)   | 2.17<br>(0.75,3.58)   | 2.17<br>(1.17,3.17)   | 2.35<br>(0.93,3.78)  | -2.11<br>(-4.54,0.33)  | -1.1<br>(-2.43,0.23)   | -2.1<br>(-3.01,-1.18)  | -2.34<br>(-3.45,-1.24) | -1.64<br>(-3.11,-0.17) | 0.13<br>(-0.97,1.24)   | 1.69<br>(0.64,2.75)   | 1.25<br>(-0.19,2.68)   | 1.89<br>(0.34,3.64)   | -0.51<br>(-1.85,0.83)  | -1.97<br>(-2.99,-0.95) | 0.09<br>(-0.73,0.92)   | -3.18<br>(-5.36,-1)    | -2.06<br>(-3.11,-1.01) | 0.03<br>(-1.03,1.09)   | -0.12<br>(-1.03,0.8)   | 0.06<br>(-0.92,1.03)   |
| -2.05<br>(-3.57,-0.54) | -4.54<br>(-5.79,-3.29) | -2.25<br>(-3.27,-1.22) | CANA                  | -3.05<br>(-4.46,-1.63) | 0.02<br>(-0.98,1.02)  | -0.08<br>(-1.36,1.2)  | -0.08<br>(-0.88,0.72) | 0.11<br>(-1.22,1.43) | -4.35<br>(-6.73,-1.97) | -3.34<br>(-4.54,-2.14) | -4.38<br>(-5,-3.68)    | -4.59<br>(-5.53,-3.65) | -3.89<br>(-5.2,-2.57)  | -2.11<br>(-3.04,-1.18) | -0.55<br>(-1.4,0.3)   | -1<br>(-2.33,0.34)     | -0.35<br>(-2.02,1.32) | -2.75<br>(-3.98,-1.52) | -4.21<br>(-5.36,-3.07) | -2.15<br>(-2.78,-1.52) | -5.42<br>(-7.54,-3.31) | -4.31<br>(-5.18,-3.43) | -2.21<br>(-3.12,-1.31) | -2.37<br>(-3,-1.73)    | -2.19<br>(-2.98,-1.4)  |
| 0.99<br>(-0.92,2.9)    | -1.5<br>(-3.21,0.21)   | 0.8<br>(-0.75,-2.35)   | 3.05<br>(1.63,4.46)   | COL                    | 3.07<br>(1.54,4.6)    | 2.97<br>(1.23,4.7)    | 2.97<br>(1.55,4.39)   | 3.15<br>(1.39,4.92)  | -1.31<br>(-3.96,-1.34) | -0.3<br>(-1.93,1.33)   | -1.3<br>(-2.66,0.07)   | -1.54<br>(-3.03,-0.06) | -0.84<br>(-2.56,0.88)  | 0.93<br>(-0.57,2.44)   | 2.49<br>(1.07,3.92)   | 2.05<br>(0.28,3.82)    | 2.69<br>(0.66,4.73)   | 0.29<br>(-1.4,1.98)    | -1.17<br>(-2.81,0.47)  | 0.89<br>(-0.43,2.21)   | -2.38<br>(-4.79,0.04)  | -1.26<br>(-2.61,0.09)  | 0.83<br>(-0.64,2.3)    | 0.68<br>(-0.6,1.96)    | 0.86<br>(-0.55,2.26)   |
| -2.07<br>(-3.66,-0.49) | -4.56<br>(-5.92,-3.21) | -2.27<br>(-3.41,-1.13) | -0.02<br>(-1.02,0.98) | -3.07<br>(-4.6,-1.54)  | DAPA                  | -0.1<br>(-1.5,1.3)    | -0.1<br>(-1.08,0.88)  | 0.09<br>(-1.32,1.49) | -4.37<br>(-6.8,-1.95)  | -3.37<br>(-4.68,-2.05) | -4.36<br>(-5.27,-3.46) | -4.61<br>(-5.43,-3.79) | -3.91<br>(-5.35,-2.46) | -2.13<br>(-3.22,-1.04) | -0.57<br>(-1.6,0.46)  | -1.02<br>(-2.44,0.4)   | -0.37<br>(-2.11,1.36) | -2.77<br>(-4.09,-1.46) | -4.24<br>(-5.5,-2.97)  | -2.17<br>(-2.96,-1.38) | -5.44<br>(-7.61,-3.28) | -4.33<br>(-5.35,-3.31) | -2.24<br>(-3.19,-1.28) | -2.39<br>(-3.25,-1.52) | -2.21<br>(-3.16,-1.26) |
| -1.97<br>(-3.77,-0.17) | -4.46<br>(-6.04,-2.88) | -2.17<br>(-3.58,-0.75) | 0.08<br>(-1.2,1.36)   | -2.97<br>(-4.7,-1.23)  | 0.1<br>(-1.3,1.5)     | EMPA/LINA             | 0<br>(-1.07,1.08)     | 0.19<br>(-1.46,1.83) | -4.27<br>(-6.84,-1.7)  | -3.26<br>(-4.81,-1.72) | -4.26<br>(-5.41,-3.11) | -4.51<br>(-5.87,-3.15) | -2.03<br>(-5.46,-2.15) | -0.47<br>(-3.16,-0.9)  | -0.92<br>(-1.77,0.83) | -0.2<br>(-2.57,0.73)   | -0.27<br>(-2.2,1.66)  | -2.67<br>(-4.24,-1.11) | -4.13<br>(-5.63,-2.64) | -2.07<br>(-3.23,-0.91) | -5.34<br>(-7.67,-3.01) | -4.23<br>(-5.54,-2.91) | -2.13<br>(-3.47,-0.8)  | -2.28<br>(-3.48,-1.09) | -2.11<br>(-3.36,-0.86) |
| -1.98<br>(-3.47,-0.48) | -4.46<br>(-5.69,-3.24) | -2.17<br>(-3.17,-1.17) | 0.08<br>(-0.72,0.88)  | -2.97<br>(-4.39,-1.55) | 0.1<br>(-0.88,1.08)   | 0<br>(-1.08,1.07)     | EMPA                  | 0.19<br>(-1.12,1.49) | -4.28<br>(-6.64,-1.91) | -3.27<br>(-4.45,-2.09) | -4.26<br>(-4.86,-3.67) | -4.51<br>(-5.83,-3.59) | -3.81<br>(-5.13,-2.49) | -2.03<br>(-2.83,-1.24) | -0.47<br>(-1.31,0.36) | -0.92<br>(-2.24,0.39)  | -0.28<br>(-1.93,1.38) | -4.14<br>(-5.25,-3.02) | -2.08<br>(-2.66,-1.49) | -5.35<br>(-7.45,-3.24) | -4.23<br>(-5.09,-3.37) | -2.14<br>(-3.02,-1.26) | -2.29<br>(-2.93,-1.64) | -2.11<br>(-2.86,-1.36) |                        |
| -2.16<br>(-3.97,-0.36) | -4.65<br>(-6.25,-3.05) | -2.35<br>(-3.78,-0.93) | -0.11<br>(-1.43,1.22) | -3.15<br>(-4.92,-1.39) | -0.09<br>(-1.49,1.32) | -0.19<br>(-1.83,1.46) | -0.19<br>(-1.69,1.12) | EXEN                 | -4.46<br>(-7.03,-1.89) | -3.45<br>(-5.02,-1.88) | -4.45<br>(-5.7,-3.2)   | -4.7<br>(-6.07,-3.32)  | -3.99<br>(-5.68,-2.3)  | -2.22<br>(-3.61,-0.83) | -0.66<br>(-2.01,0.69) | -1.11<br>(-2.15,-0.06) | -0.46<br>(-2.4,1.47)  | -2.86<br>(-4.43,-1.29) | -4.32<br>(-5.85,-2.79) | -2.26<br>(-3.43,-1.1)  | -5.53<br>(-7.86,-3.2)  | -4.41<br>(-5.75,-3.07) | -2.32<br>(-3.66,-0.98) | -2.47<br>(-3.71,-1.24) | -2.3<br>(-3.58,-1.02)  |
| 2.3<br>(0.47,4.13)     | -0.19<br>(-2.73,2.35)  | 2.11<br>(0.33,3.54)    | 4.35<br>(1.97,6.73)   | 1.31<br>(-1.34,3.96)   | 4.37<br>(1.95,6.8)    | 4.27<br>(1.7,6.84)    | 4.28<br>(1.91,6.64)   | 4.46<br>(1.89,7.03)  | GLIB                   | 1.01<br>(-1.52,3.53)   | 0.01<br>(-2.33,2.35)   | -0.24<br>(-2.65,2.17)  | 0.47<br>(-2.13,0.7)    | 2.24<br>(-0.18,2.66)   | 3.8<br>(1.41,6.19)    | 3.35<br>(0.78,5.93)    | 4<br>(1.23,6.77)      | 1.6<br>(-0.92,4.12)    | 0.14<br>(-2.36,2.64)   | 2.2<br>(-0.09,4.49)    | -1.07<br>(-4.13,1.99)  | 0.05<br>(-2.34,2.43)   | 2.14<br>(-0.25,4.53)   | 1.99<br>(-0.34,4.32)   | 2.16<br>(-0.19,4.52)   |
| 1.29<br>(-0.44,3.03)   | -1.2<br>(-2.71,0.31)   | 1.1<br>(-0.23,2.43)    | 3.34<br>(2.14,4.54)   | 0.3<br>(-1.33,1.93)    | 3.37<br>(2.05,4.68)   | 3.26<br>(1.72,4.81)   | 3.27<br>(2.09,4.45)   | 3.45<br>(1.88,5.02)  | -1.01<br>(-3.53,1.52)  | GLIC                   | -1<br>(-2.1,0.11)      | -1.25<br>(-2.52,0.03)  | -0.54<br>(-2.13,1.05)  | 1.23<br>(-0.04,2.51)   | 2.79<br>(1.57,4.01)   | 2.99<br>(0.77,3.92)    | 2.99<br>(1.12,4.86)   | 0.59<br>(-0.9,2.08)    | -0.87<br>(-2.3,0.56)   | 1.19<br>(0.14,2.24)    | -2.08<br>(-4.35,0.2)   | -0.96<br>(-2.0,0.8)    | 1.13<br>(-0.11,2.37)   | 0.98<br>(-0.11,2.07)   | 1.15<br>(0.13,2.18)    |
| 2.29<br>(0.83,3.74)    | -0.2<br>(-1.35,0.95)   | 2.1<br>(1.18,3.01)     | 4.34<br>(3.68,5)      | 1.3<br>(-0.07,2.66)    | 4.36<br>(3.45,5.27)   | 4.26<br>(3.11,5.41)   | 4.26<br>(3.67,4.86)   | 4.45<br>(3.2,5.7)    | -0.01<br>(-2.35,2.33)  | 1<br>(-0.11,2.1)       | GLIM                   | -0.25<br>(-1.09,0.6)   | 0.46<br>(-0.8,1.72)    | 2.23<br>(1.5,2.96)     | 3.79<br>(3.09,4.49)   | 3.34<br>(2.08,4.61)    | 3.99<br>(2.38,5.6)    | 1.59<br>(0.44,2.74)    | 0.13<br>(-0.89,1.14)   | 2.19<br>(1.73,2.65)    | -1.08<br>(-3.15,0.99)  | 0.03<br>(-0.73,0.8)    | 2.13<br>(1.33,2.93)    | 1.98<br>(1.47,2.49)    | 2.15<br>(1.55,2.75)    |
| 2.54<br>(0.98,4.1)     | 0.05<br>(-1.27,1.37)   | 2.34<br>(1.24,3.45)    | 4.59<br>(3.65,5.53)   | 1.54<br>(0.06,3.03)    | 4.61<br>(3.79,5.43)   | 4.51<br>(3.15,5.87)   | 4.51<br>(3.59,5.43)   | 4.7<br>(3.32,6.07)   | 0.24<br>(-2.17,2.65)   | 1.25<br>(-0.03,2.52)   | 0.25<br>(-0.6,1.09)    | GLIP                   | 0.71<br>(-0.69,2.1)    | 2.48<br>(1.43,3.52)    | 4.04<br>(3.07,5.01)   | 3.59<br>(2.2,4.98)     | 4.24<br>(2.53,5.95)   | 1.84<br>(0.55,3.12)    | 0.38<br>(-0.85,1.6)    | 2.44<br>(1.73,3.17)    | -0.83<br>(-2.98,1.32)  | 0.28<br>(-0.68,1.25)   | 2.38<br>(1.59,3.16)    | 2.3<br>(1.44,3.01)     | 2.4<br>(1.5,3.3)       |
| 1.83<br>(-0.01,3.63)   | -0.66<br>(-2.29,0.98)  | 1.64<br>(0.17,3.11)    | 3.89<br>(2.57,5.2)    | 0.84<br>(-0.88,2.56)   | 3.91<br>(2.46,5.35)   | 3.8<br>(2.15,5.46)    | 3.81<br>(2.49,5.13)   | 3.99<br>(2.3,5.68)   | -0.47<br>(-3.07,2.13)  | 0.54<br>(-1.05,2.13)   | -0.46<br>(-1.72,0.8)   | -0.71<br>(-2.1,0.69)   | GLAR                   | 1.77<br>(0.36,3.19)    | 3.33<br>(2.01,4.65)   | 2.89<br>(1.9,4.58)     | 3.53<br>(1.56,5.5)    | 1.13<br>(-0.48,2.75)   | 1.73<br>(-1.89,1.23)   | -0.33<br>(0.52,2.96)   | -1.54<br>(-3.9,0.82)   | -0.42<br>(-1.77,0.92)  | 1.67<br>(0.29,3.05)    | 1.69<br>(0.37,2.57)    | 1.69<br>(0.38,3.01)    |
| 0.06<br>(-1.52,1.63)   | -2.43<br>(-3.75,-1.12) | -0.13<br>(-1.24,0.97)  | 2.11<br>(1.18,3.04)   | -0.93<br>(-2.44,0.57)  | 2.13<br>(1.04,3.22)   | 2.03<br>(0.9,3.16)    | 2.03<br>(1.24,2.83)   | 2.22<br>(0.83,3.61)  | -2.24<br>(-4.66,0.18)  | -1.23<br>(-2.53,0.04)  | -2.48<br>(-2.95,-1.5)  | -1.77<br>(-3.52,-1.43) | -2.48<br>(-3.19,-0.36) | GLAR                   | 1.56<br>(0.6,2.52)    | 1.11<br>(-0.29,2.51)   | 1.76<br>(0.04,3.48)   | -0.64<br>(-1.94,0.66)  | -2.1<br>(-3.31,-0.9)   | -0.04<br>(-0.8,0.72)   | -3.31<br>(-5.47,-1.15) | -2.2<br>(-3.18,-1.21)  | -0.1<br>(-1.11,0.9)    | -0.25<br>(-1.07,0.56)  | -0.08<br>(-0.96,0.8)   |
| -1.5<br>(-3.04,0.04)   | -3.99<br>(-5.27,-2.71) | -1.69<br>(-2.75,-0.64) | 0.55<br>(-0.3,1.4)    | -2.49<br>(-3.92,-1.07) | 0.57<br>(-0.46,1.6)   | 0.47<br>(-0.83,1.77)  | 0.47<br>(-0.36,1.31)  | 0.66<br>(-0.69,2.01) | -3.8<br>(-6.19,-1.41)  | -2.79<br>(-4.01,-1.57) | -3.79<br>(-4.49,-3.09) | -4.04<br>(-5.01,-3.07) | -3.33<br>(-4.65,-2.01) | -1.56<br>(-2.52,-0.6)  | LIRA                  | -0.45<br>(-1.81,0.91)  | 0.2<br>(-1.49,1.89)   | -2.2<br>(-3.46,-0.95)  | -3.66<br>(-4.83,-2.49) | -1.6<br>(-2.28,-0.92)  | -4.87<br>(-7,-2.74)    | -3.75<br>(-4.66,-2.85) | -1.66<br>(-2.6,-0.72)  | -1.81<br>(-2.46,-1.16) | -1.64<br>(-2.46,-0.81) |
| -1.05<br>(-2.87,0.76)  | -3.54<br>(-5.15,-1.93) | -1.25<br>(-2.68,0.19)  | 1<br>(-0.34,2.33)     | -2.05<br>(-3.82,0.28)  | 1.02<br>(-0.4,2.44)   | 0.92<br>(-0.73,2.57)  | 0.92<br>(-0.39,2.24)  | 1.11<br>(0.06,2.15)  | -3.35<br>(-5.93,-0.78) | -2.35<br>(-3.92,-0.77) | -3.34<br>(-4.61,-2.08) | -3.59<br>(-4.98,-2.2)  | -2.89<br>(-4.58,-1.19) | -1.11<br>(-2.51,0.29)  | 0.45<br>(-0.91,1.81)  | LIX                    | 0.65<br>(-1.3,2.59)   | -1.75<br>(-3.33,-0.17) | -3.22<br>(-4.75,-1.68) | -1.15<br>(-2.33,0.02)  | -4.42<br>(-6.76,2.09)  | -3.31<br>(-4.66,-1.96) | -1.22<br>(-2.57,0.14)  | -1.37<br>(-2.61,-0.12) | -1.19<br>(-2.48,0.1)   |
| -1.7<br>(-3.77,0.37)   | -4.19<br>(-6.09,-2.29) | -1.89<br>(-3.64,-0.14) | 0.35<br>(-1.32,2.02)  | -2.69<br>(-4.73,-0.66) | 0.37<br>(-1.36,2.11)  | 0.27<br>(-1.66,2.2)   | 0.28<br>(-1.38,1.93)  | 0.46<br>(-1.47,2.4)  | -4<br>(-6.77,-1.23)    | -2.99<br>(-4.86,-1.12) | -3.99<br>(-5.6,-2.38)  | -4.24<br>(-5.95,-2.53) | -3.53<br>(-5.13,-1.93) | -1.76<br>(-3.48,-0.04) | -0.2<br>(-1.89,1.49)  | -0.65<br>(-2.59,1.3)   | MIG                   | -2.4<br>(-4.27,-0.53)  | -3.86<br>(-5.7,-2.03)  | -1.8<br>(-3.35,-0.25)  | -5.07<br>(-7.61,-2.53) | -3.95<br>(-5.63,-2.27) | -1.86<br>(-3.54,-0.18) | -2.01<br>(-3.61,-0.41) | -1.84<br>(-3.47,-0.2)  |
| 0.7<br>(-1.04,2.44)    | -1.79<br>(-3.31,-0.27) | 0.51<br>(-0.83,1.85)   | 2.75<br>(1.52,3.98)   | -0.29<br>(-1.98,1.4)   | 2.77<br>(1.46,4.09)   | 2.67<br>(1.11,4.24)   | 2.68<br>(1.47,3.88)   | 2.86<br>(1.29,4.43)  | -1.6<br>(-4.12,0.92)   | -0.59<br>(-2.08,0.9)   | 2.77<br>(-2.74,-0.44)  | 1.53<br>(-3.12,-0.55)  | 1.13<br>(-2.75,0.48)   | 0.64<br>(-0.66,1.94)   | 2.2<br>(0.95,3.46)    | 1.75<br>(0.17,3.33)    | 2.4<br>(0.53,4.27)    | NAT                    | 1.75<br>(-2.91,-0.02)  | 0.6<br>(-0.45,1.65)    | -2.67<br>(-4.95,-0.39) | -1.55<br>(-2.8,-0.31)  | 0.54<br>(-0.71,1.79)   | 0.39<br>(-0.75,1.52)   | 0.56<br>(-0.62,1.74)   |
| 2.16<br>(0.47,3.86)    | -0.33<br>(-1.36,0.71)  | 1.97<br>(0.95,2.99)    | 4.21<br>(3.07,5.36)   | 1.17<br>(-0.47,2.81)   | 4.24<br>(2.97,5.5)    | 4.13<br>(2.64,5.63)   | 4.14<br>(3.02,5.25)   | 4.32<br>(2.79,5.85)  | -0.14<br>(-2.64,2.36)  | 0.87<br>(-0.56,2.3)    | -0.13<br>(-1.14,0.89)  | -0.38<br>(-1.6,0.85)   | 0.33<br>(-1.23,1.89)   | 2.1<br>(0.9,3.31)      | 3.66<br>(2.49,4.83)   | 3.22<br>(1.68,4.75)    | 3.86<br>(2.03,5.7)    | 1.46<br>(0.02,2.91)    | 2.06<br>(1.07,3.05)    | -1.21<br>(-3.45,1.04)  | -0.09<br>(-1.27,1.09)  | 2.0<br>(0.81,3.19)     | 1.85<br>(0.8,2.9)      | 2.02<br>(0.92,3.12)    |                        |
| 0.1<br>(-1.28,1.48)    | -2.39<br>(-3.49,-1.29) | -0.09<br>(-0.92,0.73)  | 2.15<br>(1.52,2.78)   | -0.89<br>(-2.21,0.43)  | 2.17<br>(1.38,2.96)   | 2.07<br>(0.91,3.23)   | 2.08<br>(1.49,2.66)   | 2.26<br>(1.1,3.43)   | -2.2<br>(-4.49,0.09)   | -1.19<br>(-2.24,-0.14) | -2.19<br>(-2.65,-1.73) | -2.44<br>(-3.17,-1.7)  | -1.73<br>(-2.96,-0.51) | 0.04<br>(-0.72,0.8)    | 1.6<br>(0.92,2.28)    | 1.15<br>(-0.02,2.33)   | 1.8<br>(0.25,3.35)    | -0.6<br>(-1.65,0.45)   | -2.06<br>(-3.05,-1.07) | PLC                    | -3.27<br>(-5.29,-1.25) | -2.15<br>(-2.81,-1.49) | -0.06<br>(-0.73,0.6)   | -0.21<br>(-0.63,0.2)   | -0.04<br>(-0.57,0.5)   |
| 3.37<br>(0.93,5.81)    | 0.88<br>(-1.42,3.18)   | 3.18<br>(1.5,36)       | 5.42<br>(3.31,7.54)   | 2.38<br>(-0.04,4.79)   | 5.44<br>(3.28,7.61)   | 5.34<br>(3.01,7.67)   | 5.35<br>(3.24,7.45)   | 5.53<br>(3.2,7.86)   | 1.07<br>(-1.99,4.13)   | 2.08<br>(-0.2,4.35)    | 1.08<br>(-0.99,3.15)   | 0.83<br>(-1.32,2.98)   | 1.54<br>(-0.82,3.9)    | 3.31<br>(1.55,4.7)     | 4.87<br>(2.74,7)      | 5.07<br>(2.09,6.76)    | 5.07<br>(2.53,7.61)   | 2.67<br>(0.39,4.95)    | 1.21<br>(-1.04,3.46)   | 3.27<br>(1.25,5.29)    | -1.12<br>(-3.45,1.04)  | -2.09<br>(-1.01,3.24)  | 3.06<br>(1.08,5.33)    | 3.23<br>(1.5,12)       | 3.23<br>(1.44,5.32)    |
| 2.25<br>(0.73,3.78)    | -0.24<br>(-1.51,1.04)  | 2.06<br>(1.01,3.11)    | 4.31<br>(3.43,5.18)   | 1.26<br>(-0.09,2.61)   | 4.33<br>(3.1,5.35)    | 4.23<br>(2.91,5.54)   | 4.23<br>(3.37,5.09)   | 4.41<br>(3.07,5.75)  | -0.05<br>(-2.43,2.34)  | 0.96<br>(-0.08,2)      | 3.31<br>(-0.8,0.73)    | 3.02<br>(-1.25,0.68)   | 4.2<br>(-0.92,1.77     |                        |                       |                        |                       |                        |                        |                        |                        |                        |                        |                        |                        |
