# Supplementary material for: Comparative Efficacy and Safety of Antidiabetic Drug Regimens Added to Metformin Monotherapy in Patients with Type 2 Diabetes: A Network Meta-Analysis
Source: PubMed Central journal article supplement (PMC4412636; doi:10.1371/journal.pone.0125879), 2015-04-28
Supplement: pone.0125879.s014.pdf [file pone.0125879.s014.pdf]

**Figure S11. Sensitivity Analysis Results of the Effect of Antidiabetic Therapies on Change in Systolic Blood Pressure From Baseline**

|                       |                       |                       |                       |                        |                       |                        |                        |                       |                        |                        |                         |                        |                        |
|-----------------------|-----------------------|-----------------------|-----------------------|------------------------|-----------------------|------------------------|------------------------|-----------------------|------------------------|------------------------|-------------------------|------------------------|------------------------|
| <b>CANA</b>           | 0.36<br>(-4.75,4.2)   | 1.29<br>(-2.85,5.43)  | 1<br>(-1.6,3.61)      | -1.3<br>(-5.29,2.68)   | -4.4<br>(-6.58,-2.22) | -4.64<br>(-10.57,1.29) | -2.56<br>(-7.03,1.91)  | -1.1<br>(-3.79,1.59)  | -1.4<br>(-6.75,3.94)   | -4.14<br>(-6.32,-1.96) | -4.78<br>(-9.02,-0.54)  | -2.26<br>(-4.37,-0.15) | -0.26<br>(-9.37,8.84)  |
| -0.36<br>(-5.42,4.7)  | <b>DAPA</b>           | 0.93<br>(-5.06,6.93)  | 0.64<br>(-4.41,5.7)   | -1.66<br>(-7.74,4.42)  | -4.76<br>(-9.84,0.32) | -5.0<br>(-8.09,-1.91)  | -2.92<br>(-9.14,3.31)  | -1.46<br>(-6.73,3.81) | -1.76<br>(-8.81,5.28)  | -4.5<br>(-9.06,0.06)   | -5.14<br>(-10.98,0.69)  | -2.62<br>(-7.59,2.35)  | -0.62<br>(-10.78,9.54) |
| -1.29<br>(-5.43,2.85) | -0.93<br>(-6.93,5.06) | <b>EMPA/LINA</b>      | -0.29<br>(-3.51,2.93) | -2.59<br>(-7.72,2.53)  | -5.69<br>(-9.58,-1.8) | -5.93<br>(-12.68,0.81) | -3.85<br>(-7.48,-0.22) | -2.39<br>(-6.72,1.93) | -2.69<br>(-8.94,3.55)  | -5.43<br>(-9.32,-1.54) | -6.08<br>(-11.4,-0.75)  | -3.55<br>(-7.62,0.51)  | -1.55<br>(-11.3,8.19)  |
| -1<br>(-3.61,1.6)     | -0.64<br>(-5.74,4.41) | 0.29<br>(-2.93,3.51)  | <b>EMPA</b>           | -2.3<br>(-6.29,1.68)   | -5.4<br>(-7.59,-3.22) | -5.64<br>(-11.57,0.28) | -3.56<br>(-7.19,0.07)  | -2.1<br>(-4.99,0.78)  | -2.4<br>(-7.75,2.94)   | -5.14<br>(-7.33,-2.96) | -5.79<br>(-10.03,-1.54) | -3.26<br>(-5.74,-0.78) | -1.26<br>(-10.46,7.94) |
| 1.3<br>(-2.68,5.29)   | 1.66<br>(-4.42,7.74)  | 2.59<br>(-2.53,7.72)  | 2.3<br>(-1.68,6.29)   | <b>EXEN</b>            | -3.1<br>(-6.43,0.23)  | -3.34<br>(-10.16,3.48) | -1.26<br>(-6.65,4.14)  | 0.2<br>(-3.94,4.34)   | -0.1<br>(-6.01,5.81)   | -2.84<br>(-6.85,1.18)  | -3.48<br>(-8.9,1.94)    | -0.96<br>(-4.99,3.08)  | 1.04<br>(-8.69,10.78)  |
| 4.4<br>(2.22,6.58)    | 4.76<br>(0.32,9.84)   | 5.69<br>(1.8,9.58)    | 5.4<br>(3.22,7.59)    | 3.1<br>(-0.23,6.43)    | <b>GLIM</b>           | -0.24<br>(-6.19,5.71)  | 1.84<br>(-2.39,6.08)   | 3.3<br>(0.85,5.75)    | 3<br>(-1.88,7.88)      | 0.26<br>(-1.97,2.5)    | -0.38<br>(-4.65,3.89)   | 2.14<br>(-0.13,4.42)   | 4.14<br>(-5.13,2.9)    |
| 4.64<br>(-1.29,10.57) | 5<br>(1.91,8.09)      | 5.93<br>(-0.81,12.68) | 5.64<br>(-0.28,11.57) | 3.34<br>(-3.48,10.16)  | 0.24<br>(-5.71,6.19)  | <b>GLIP</b>            | 2.08<br>(-4.87,9.04)   | 3.54<br>(-2.57,9.65)  | 3.24<br>(-4.46,10.93)  | 0.5<br>(-5.01,6.01)    | -0.14<br>(-6.75,6.46)   | 2.38<br>(-3.47,8.23)   | 4.38<br>(-6.24,15)     |
| 2.56<br>(-1.91,7.03)  | 2.92<br>(-3.31,9.14)  | 3.85<br>(0.22,7.48)   | 3.56<br>(-0.07,7.19)  | 1.26<br>(-4.14,6.65)   | -1.84<br>(-6.08,2.39) | -2.08<br>(-9.04,4.87)  | <b>LINA</b>            | 1.46<br>(-3.18,6.1)   | 1.16<br>(-5.31,7.62)   | -1.58<br>(-5.82,2.66)  | -2.23<br>(-7.81,3.36)   | 0.3<br>(-4.1,4.7)      | 2.3<br>(-7.59,12.19)   |
| 1.1<br>(-1.59,3.79)   | 1.46<br>(-3.81,6.73)  | 2.39<br>(-1.93,6.72)  | 2.1<br>(-0.78,4.99)   | -0.2<br>(-4.34,3.94)   | -3.3<br>(-5.75,-0.85) | -3.54<br>(-9.65,2.57)  | -1.46<br>(-6.1,3.18)   | <b>LIRA</b>           | -0.3<br>(-5.76,5.16)   | -3.04<br>(-5.68,-0.4)  | -3.68<br>(-8.18,0.81)   | -1.16<br>(-3.29,0.98)  | 0.84<br>(-8.27,9.95)   |
| 1.4<br>(-3.94,6.75)   | 1.76<br>(-5.28,8.81)  | 2.69<br>(-3.55,8.94)  | 2.4<br>(-2.94,7.75)   | 0.1<br>(-5.81,6.01)    | -3<br>(-7.88,1.88)    | -3.24<br>(-10.93,4.46) | -1.16<br>(-7.62,5.31)  | 0.3<br>(-5.16,5.76)   | <b>PIO</b>             | -2.74<br>(-8.11,2.63)  | -3.38<br>(-9.87,3.1)    | -0.86<br>(-6.24,4.53)  | 1.14<br>(-9.22,11.51)  |
| 4.14<br>(1.96,6.32)   | 4.5<br>(-0.06,9.06)   | 5.43<br>(1.54,9.32)   | 5.14<br>(2.96,7.33)   | 2.84<br>(-1.18,6.85)   | -0.26<br>(-2.5,1.97)  | -0.5<br>(-6.01,5.01)   | 1.58<br>(-2.66,5.82)   | 3.04<br>(0.4,5.68)    | 2.74<br>(-2.63,8.11)   | <b>PLC</b>             | -0.64<br>(-4.28,3)      | 1.88<br>(-0.09,3.85)   | 3.88<br>(-5.19,12.95)  |
| 4.78<br>(0.54,9.02)   | 5.14<br>(-0.69,10.98) | 6.08<br>(0.75,11.4)   | 5.79<br>(1.54,10.03)  | 3.48<br>(-1.94,8.9)    | 0.38<br>(-3.89,4.65)  | 0.14<br>(-6.46,6.75)   | 2.23<br>(-3.36,7.81)   | 3.68<br>(-0.81,8.18)  | 3.38<br>(-3.1,9.87)    | 0.64<br>(-3.4,2.8)     | <b>SAX</b>              | 2.52<br>(-1.61,6.66)   | 4.52<br>(-5.25,14.3)   |
| 2.26<br>(0.15,4.37)   | 2.62<br>(-2.35,7.59)  | 3.55<br>(-0.51,7.62)  | 3.26<br>(0.78,5.74)   | 0.96<br>(-3.08,4.99)   | -2.14<br>(-4.42,0.13) | -2.38<br>(-8.23,3.47)  | -0.3<br>(-4.7,4.1)     | 1.16<br>(-0.98,3.29)  | 0.86<br>(-4.53,6.24)   | -1.88<br>(-3.85,0.09)  | -2.52<br>(-6.66,1.61)   | <b>SITA</b>            | 2<br>(-6.86,10.86)     |
| 0.26<br>(-8.84,9.37)  | 0.62<br>(-9.54,10.78) | 1.55<br>(-8.19,11.3)  | 1.26<br>(-7.94,10.46) | -1.04<br>(-10.78,8.69) | -4.14<br>(-13.29,5)   | -4.38<br>(-15,6.24)    | -2.3<br>(-12.19,7.59)  | -0.84<br>(-9.95,8.27) | -1.14<br>(-11.51,9.22) | -3.88<br>(-12.95,5.19) | -4.52<br>(-14.3,5.25)   | -2<br>(-10.86,6.86)    | <b>VILDA</b>           |
