# Supplementary material for: Comparative Efficacy and Safety of Antidiabetic Drug Regimens Added to Metformin Monotherapy in Patients with Type 2 Diabetes: A Network Meta-Analysis
Source: PubMed Central journal article supplement (PMC4412636; doi:10.1371/journal.pone.0125879), 2015-04-28
Supplement: pone.0125879.s015.pdf [file pone.0125879.s015.pdf]

**Figure S12. Sensitivity Analysis Results of the Effect of Antidiabetic Therapies on Risk of Confirmed Hypoglycemia**

|                         |                          |                       |                         |                         |                        |                        |                      |                       |                       |                       |                         |                         |                         |                       |                         |                         |                      |                         |                         |                        |                         |
|-------------------------|--------------------------|-----------------------|-------------------------|-------------------------|------------------------|------------------------|----------------------|-----------------------|-----------------------|-----------------------|-------------------------|-------------------------|-------------------------|-----------------------|-------------------------|-------------------------|----------------------|-------------------------|-------------------------|------------------------|-------------------------|
| ACA                     | 3.1<br>(0.03,276.52)     | 0.56<br>(0.01,23.46)  | 0.52<br>(0.01,22.4)     | 1<br>(0.02,43.05)       | 1.34<br>(0.02,92.13)   | 0.28<br>(0.01,11.42)   | 0.07<br>(0.4,22)     | 0.05<br>(0.2,94)      | 0.13<br>(0.4,57)      | 0.04<br>(0.1,79)      | 1.1<br>(0.03,44.83)     | 0.65<br>(0.02,26.39)    | 0.55<br>(0.01,28.72)    | 0.07<br>(0.4,4)       | 0.4<br>(0.01,23.72)     | 0.51<br>(0.02,16.66)    | 0.03<br>(0.5,45)     | 0.5<br>(0.01,25.57)     | 0.58<br>(0.01,26.77)    | 0.39<br>(0.01,14.61)   | 0.68<br>(0.02,29.09)    |
| 0.32<br>(0.2,86)        | ALO                      | 0.18<br>(0.01,4.1)    | 0.17<br>(0.01,3.92)     | 0.32<br>(0.01,7.56)     | 0.43<br>(0.01,17.49)   | 0.09<br>(0.1,99)       | 0.02<br>(0.0,78)     | 0.02<br>(0.0,54)      | 0.04<br>(0.0,77)      | 0.01<br>(0.0,31)      | 0.35<br>(0.02,7.79)     | 0.21<br>(0.01,4.57)     | 0.18<br>(0.01,5.22)     | 0.02<br>(0.0,82)      | 0.13<br>(0.4,41)        | 0.16<br>(0.01,2.76)     | 0.01<br>(0.1,16)     | 0.16<br>(0.01,4.63)     | 0.19<br>(0.01,4.77)     | 0.13<br>(0.01,2.49)    | 0.22<br>(0.01,5.1)      |
| 1.79<br>(0.04,75.51)    | 5.55<br>(0.24,126.42)    | CANA                  | 0.94<br>(0.14,6.13)     | 1.79<br>(0.3,10.57)     | 2.4<br>(0.17,33.32)    | 0.5<br>(0.09,2.75)     | 0.13<br>(0.01,1.3)   | 0.09<br>(0.01,1)      | 0.23<br>(0.06,0.8)    | 0.08<br>(0.01,0.45)   | 1.97<br>(0.37,10.59)    | 1.17<br>(0.23,5.92)     | 0.98<br>(0.11,9.02)     | 0.13<br>(0.01,1.59)   | 0.71<br>(0.06,7.89)     | 0.91<br>(0.24,3.46)     | 0.05<br>(0.3,28)     | 0.9<br>(0.1,8.17)       | 1.03<br>(0.14,7.39)     | 0.7<br>(0.17,2.91)     | 1.22<br>(0.2,7.27)      |
| 1.91<br>(0.04,81.55)    | 5.91<br>(0.25,136.93)    | 1.06<br>(0.16,6.94)   | DAPA                    | 1.9<br>(0.27,13.16)     | 2.55<br>(0.16,39.39)   | 0.53<br>(0.08,3.37)    | 0.14<br>(0.01,1.49)  | 0.1<br>(0.01,1.15)    | 0.24<br>(0.05,1.14)   | 0.08<br>(0.02,0.35)   | 2.09<br>(0.33,13.1)     | 1.25<br>(0.22,7.16)     | 1.04<br>(0.1,10.48)     | 0.13<br>(0.01,1.8)    | 0.76<br>(0.06,9.37)     | 0.97<br>(0.24,3.84)     | 0.05<br>(0.3,54)     | 0.96<br>(0.1,9.12)      | 1.1<br>(0.15,8.05)      | 0.74<br>(0.16,3.47)    | 1.3<br>(0.19,8.91)      |
| 1<br>(0.02,43.43)       | 3.11<br>(0.13,73.1)      | 0.56<br>(0.09,3.31)   | 0.53<br>(0.08,3.65)     | EMPA                    | 1.34<br>(0.15,11.7)    | 0.28<br>(0.05,1.62)    | 0.08<br>(0.01,0.78)  | 0.05<br>(0.0,58)      | 0.13<br>(0.03,0.47)   | 0.04<br>(0.01,0.27)   | 1.1<br>(0.24,5.16)      | 0.66<br>(0.12,3.58)     | 0.55<br>(0.06,5.26)     | 0.07<br>(0.01,0.92)   | 0.4<br>(0.03,4.57)      | 0.51<br>(0.12,2.08)     | 0.03<br>(0.1,88)     | 0.5<br>(0.05,4.79)      | 0.58<br>(0.08,4.44)     | 0.39<br>(0.08,1.82)    | 0.68<br>(0.11,4.26)     |
| 0.75<br>(0.01,51.63)    | 2.32<br>(0.06,93.91)     | 0.42<br>(0.03,5.8)    | 0.39<br>(0.03,6.06)     | 0.75<br>(0.09,6.5)      | EMPA/LINA              | 0.21<br>(0.02,2.85)    | 0.06<br>(0.1,18)     | 0.04<br>(0.0,85)      | 0.09<br>(0.01,0.99)   | 0.03<br>(0.0,46)      | 0.82<br>(0.08,8.48)     | 0.49<br>(0.04,6.46)     | 0.41<br>(0.02,8.02)     | 0.05<br>(0.1,31)      | 0.3<br>(0.01,6.7)       | 0.38<br>(0.03,4.15)     | 0.02<br>(0.2,13)     | 0.38<br>(0.02,7.32)     | 0.43<br>(0.03,7.19)     | 0.29<br>(0.02,3.48)    | 0.51<br>(0.04,7.32)     |
| 3.59<br>(0.09,147.48)   | 11.12<br>(0.5,245.67)    | 2<br>(0.36,11.03)     | 1.88<br>(0.3,11.93)     | 3.58<br>(0.62,20.69)    | 4.8<br>(0.35,65.59)    | EXEN                   | 0.27<br>(0.03,2.69)  | 0.18<br>(0.02,1.94)   | 0.46<br>(0.13,1.57)   | 0.16<br>(0.03,0.89)   | 3.94<br>(0.76,20.52)    | 2.35<br>(0.46,12.01)    | 1.97<br>(0.38,10.25)    | 0.25<br>(0.02,3.09)   | 1.42<br>(0.13,15.47)    | 1.82<br>(0.51,6.44)     | 0.1<br>(0.6,43)      | 1.81<br>(0.21,15.85)    | 2.07<br>(0.29,14.91)    | 1.4<br>(0.32,6.12)     | 2.44<br>(0.42,14.1)     |
| 13.37<br>(0.24,754.41)  | 41.4<br>(1.29,1330.77)   | 7.45<br>(0.77,72.31)  | 7.01<br>(0.67,73.08)    | 13.31<br>(1.28,138.41)  | 17.86<br>(0.85,375.22) | 3.72<br>(0.37,37.21)   | GLAR                 | 0.68<br>(0.04,11.52)  | 1.69<br>(0.23,12.75)  | 0.58<br>(0.07,5.04)   | 14.67<br>(1.5,143.91)   | 8.74<br>(1.12,68.38)    | 7.32<br>(0.49,108.71)   | 0.94<br>(0.05,17.99)  | 5.3<br>(0.3,92.24)      | 6.78<br>(0.9,50.84)     | 0.36<br>(0.31,76)    | 6.72<br>(0.47,95.16)    | 7.7<br>(0.76,77.88)     | 5.21<br>(0.89,30.49)   | 9.09<br>(0.85,96.6)     |
| 19.78<br>(0.34,1149.37) | 61.23<br>(1.84,2037.13)  | 11.03<br>(1,121.08)   | 10.37<br>(0.87,123.09)  | 19.69<br>(1.73,224.68)  | 26.42<br>(1.18,593.13) | 5.51<br>(0.51,58.85)   | 1.48<br>(0.09,25.21) | GLIC                  | 2.51<br>(0.3,20.64)   | 0.86<br>(0.08,9.47)   | 21.7<br>(2.06,229.08)   | 12.92<br>(1.25,133.41)  | 10.83<br>(0.69,169.7)   | 1.39<br>(0.29,6.67)   | 7.84<br>(1.27,48.17)    | 10.02<br>(1.26,79.74)   | 0.53<br>(0.01,48.25) | 9.94<br>(1.08,91.29)    | 11.39<br>(0.87,149.5)   | 7.7<br>(0.84,70.76)    | 13.44<br>(1.18,152.72)  |
| 7.89<br>(0.22,284.8)    | 24.43<br>(1.29,461.77)   | 4.4<br>(1.25,15.53)   | 4.14<br>(0.88,19.46)    | 7.86<br>(2.11,29.3)     | 10.54<br>(1.01,110.2)  | 2.2<br>(0.64,7.56)     | 0.59<br>(0.08,4.44)  | 0.4<br>(0.05,3.28)    | GLIM                  | 0.34<br>(0.09,1.38)   | 8.66<br>(2.62,28.59)    | 5.16<br>(1.58,16.79)    | 4.32<br>(0.65,28.83)    | 0.56<br>(0.06,5.37)   | 3.13<br>(0.39,25.39)    | 4<br>(1.78,9.0)         | 0.21<br>(0.12,6)     | 3.97<br>(0.58,27.01)    | 4.54<br>(0.86,23.99)    | 3.07<br>(1.16,8.14)    | 5.36<br>(1.41,20.39)    |
| 23.03<br>(0.56,950)     | 71.29<br>(3.21,1584.11)  | 12.84<br>(2.24,73.53) | 12.07<br>(2.88,50.54)   | 22.93<br>(3.71,141.52)  | 30.77<br>(2.15,439.93) | 6.41<br>(1.12,36.62)   | 1.72<br>(0.2,14.95)  | 1.16<br>(0.11,12.84)  | 2.92<br>(0.73,11.75)  | GLIP                  | 25.27<br>(4.5,141.75)   | 15.05<br>(3.2,70.81)    | 12.61<br>(1.36,117.23)  | 1.62<br>(0.13,20.31)  | 9.12<br>(0.8,104.34)    | 11.67<br>(3.25,41.92)   | 0.62<br>(0.01,41.38) | 11.57<br>(1.32,101.71)  | 13.26<br>(2.26,77.88)   | 8.97<br>(2.59,31.1)    | 15.65<br>(2.52,97.22)   |
| 0.91<br>(0.02,37.25)    | 2.82<br>(0.13,61.99)     | 0.51<br>(0.09,2.73)   | 0.48<br>(0.08,2.99)     | 0.91<br>(0.19,4.25)     | 1.22<br>(0.12,12.57)   | 0.25<br>(0.05,1.32)    | 0.07<br>(0.01,0.67)  | 0.05<br>(0.0,49)      | 0.12<br>(0.03,0.38)   | 0.04<br>(0.01,0.22)   | LINA                    | 0.6<br>(0.12,2.97)      | 0.5<br>(0.06,4.38)      | 0.06<br>(0.01,0.78)   | 0.36<br>(0.03,3.86)     | 0.46<br>(0.13,1.61)     | 0.02<br>(0.1,62)     | 0.46<br>(0.05,3.98)     | 0.52<br>(0.07,3.72)     | 0.35<br>(0.08,1.51)    | 0.62<br>(0.11,3.5)      |
| 1.53<br>(0.04,61.83)    | 4.74<br>(0.22,102.66)    | 0.85<br>(0.17,4.31)   | 0.8<br>(0.14,4.61)      | 1.52<br>(0.28,8.32)     | 2.04<br>(0.15,26.99)   | 0.43<br>(0.08,2.18)    | 0.11<br>(0.01,0.9)   | 0.08<br>(0.01,0.8)    | 0.19<br>(0.06,0.63)   | 0.07<br>(0.01,0.31)   | 1.68<br>(0.34,8.37)     | LIRA                    | 0.84<br>(1.7,25)        | 0.11<br>(0.01,1.28)   | 0.61<br>(0.06,6.38)     | 0.78<br>(0.23,2.62)     | 0.04<br>(0.2,7)      | 0.77<br>(0.09,6.41)     | 0.88<br>(0.15,5.2)      | 0.6<br>(0.21,1.71)     | 1.04<br>(0.19,5.79)     |
| 1.83<br>(0.03,95.86)    | 5.66<br>(0.19,167.07)    | 1.02<br>(0.11,9.36)   | 0.96<br>(0.1,9.61)      | 1.82<br>(0.19,17.39)    | 2.44<br>(0.12,47.8)    | 0.51<br>(0.1,2.65)     | 0.14<br>(0.01,2.03)  | 0.09<br>(0.01,1.45)   | 0.23<br>(0.03,1.55)   | 0.08<br>(0.01,0.74)   | 2<br>(0.23,17.61)       | 1.19<br>(0.14,10.33)    | LIX                     | 0.13<br>(0.01,2.26)   | 0.72<br>(0.05,11.6)     | 0.93<br>(0.14,5.98)     | 0.05<br>(0.4,07)     | 0.92<br>(0.07,12.07)    | 1.05<br>(0.09,11.81)    | 0.71<br>(0.09,5.46)    | 1.24<br>(0.13,11.81)    |
| 14.19<br>(0.23,885.44)  | 43.93<br>(1.22,1586.87)  | 7.91<br>(0.63,99.3)   | 7.44<br>(0.56,99.43)    | 14.13<br>(1.08,184.03)  | 18.96<br>(0.76,472.22) | 3.95<br>(0.32,48.21)   | 1.06<br>(0.06,20.25) | 0.72<br>(0.15,3.43)   | 1.8<br>(0.19,17.36)   | 0.62<br>(0.05,7.71)   | 15.57<br>(1.29,188)     | 9.27<br>(0.78,109.71)   | 7.77<br>(0.44,136.19)   | NAT                   | 5.62<br>(0.59,53.6)     | 7.19<br>(0.79,65.56)    | 0.38<br>(0.36,91)    | 7.13<br>(0.61,83.78)    | 8.17<br>(0.55,120.89)   | 5.52<br>(0.52,58.55)   | 9.64<br>(0.74,124.82)   |
| 2.52<br>(0.04,151.14)   | 7.81<br>(0.23,269.14)    | 1.41<br>(0.13,15.62)  | 1.32<br>(0.11,16.39)    | 2.51<br>(0.22,28.89)    | 3.37<br>(0.15,76.24)   | 0.7<br>(0.06,7.63)     | 0.19<br>(0.01,3.29)  | 0.13<br>(0.02,0.78)   | 0.32<br>(0.04,2.6)    | 0.11<br>(0.01,1.25)   | 2.77<br>(0.26,29.62)    | 1.65<br>(0.16,17.35)    | 1.38<br>(0.09,22.13)    | 0.18<br>(0.02,1.7)    | PIO                     | 1.28<br>(0.15,10.78)    | 0.07<br>(0.6,33)     | 1.27<br>(0.11,14.9)     | 1.45<br>(0.11,19.69)    | 0.98<br>(0.1,9.28)     | 1.72<br>(0.15,19.74)    |
| 1.97<br>(0.06,64.9)     | 6.11<br>(0.36,103.02)    | 1.1<br>(0.29,4.19)    | 1.03<br>(0.26,4.11)     | 1.97<br>(0.48,8.05)     | 2.64<br>(0.24,28.85)   | 0.55<br>(0.16,1.94)    | 0.15<br>(0.02,1.11)  | 0.1<br>(0.01,0.79)    | 0.25<br>(0.11,0.56)   | 0.09<br>(0.02,0.31)   | 2.17<br>(0.62,7.57)     | 1.29<br>(0.38,4.35)     | 1.08<br>(0.17,6.98)     | 0.14<br>(0.02,1.27)   | 0.78<br>(0.09,6.59)     | PLC                     | 0.05<br>(0.2,91)     | 0.99<br>(0.16,6)        | 1.14<br>(0.23,5.6)      | 0.77<br>(0.29,2.02)    | 1.34<br>(0.34,5.35)     |
| 37.34<br>(0.18,7596.52) | 115.58<br>(0.86,15560.1) | 20.81<br>(0.3,1421.2) | 19.57<br>(0.28,1364.39) | 37.17<br>(0.53,2599.52) | 49.88<br>(0.47,5303.9) | 10.39<br>(0.16,693.95) | 2.79<br>(0.02,247.6) | 1.89<br>(0.02,171.91) | 4.73<br>(0.08,282.09) | 1.62<br>(0.02,108.75) | 40.96<br>(0.62,2725.03) | 24.39<br>(0.37,1606.27) | 20.44<br>(0.25,1698.17) | 2.63<br>(0.03,255.57) | 14.79<br>(0.16,1384.02) | 18.92<br>(0.34,1039.73) | REP                  | 18.76<br>(0.23,1516.99) | 21.49<br>(0.29,1603.67) | 14.54<br>(0.24,896.87) | 25.37<br>(0.37,1758.66) |
| 1.99<br>(0.04,101.24)   | 6.16<br>(0.22,175.52)    | 1.11<br>(0.12,10.05)  | 1.04<br>(0.11,9.91)     | 1.98<br>(0.21,18.8)     | 2.66<br>(0.14,51.71)   | 0.55<br>(0.06,4.86)    | 0.15<br>(0.01,2.11)  | 0.02<br>(0.01,0.92)   | 0.25<br>(0.04,1.72)   | 0.09<br>(0.01,0.76)   | 2.18<br>(0.25,18.95)    | 1.3<br>(0.16,10.83)     | 1.09<br>(0.08,14.31)    | 0.14<br>(0.01,1.65)   | 0.79<br>(0.07,9.26)     | 1.01<br>(0.17,6.1)      | 0.05<br>(0.4,31)     | ROSI                    | 1.15<br>(0.11,12.2)     | 0.77<br>(0.11,5.58)    | 1.35<br>(0.14,12.72)    |
| 1.74<br>(0.04,80.79)    | 5.38<br>(0.21,137.84)    | 0.97<br>(0.14,6.93)   | 0.91<br>(0.12,6.68)     | 1.73<br>(0.23,13.27)    | 2.32<br>(0.14,38.73)   | 0.48<br>(0.07,3.48)    | 0.13<br>(0.01,1.31)  | 0.09<br>(0.01,1.15)   | 0.22<br>(0.04,1.16)   | 0.08<br>(0.01,0.44)   | 1.91<br>(0.27,13.5)     | 1.13<br>(0.19,6.7)      | 0.95<br>(0.08,10.68)    | 0.12<br>(0.01,1.81)   | 0.69<br>(0.05,9.32)     | 0.88<br>(0.18,4.33)     | 0.05<br>(0.3,47)     | 0.87<br>(0.08,9.3)      | SAX                     | 0.68<br>(0.15,3.01)    | 1.18<br>(0.15,9.16)     |
| 2.57<br>(0.07,96.35)    | 7.95<br>(0.4,157.55)     | 1.43<br>(0.34,5.97)   | 1.35<br>(0.29,6.28)     | 2.56<br>(0.55,11.88)    | 3.43<br>(0.29,40.94)   | 0.71<br>(0.16,3.13)    | 0.19<br>(0.03,1.12)  | 0.13<br>(0.01,1.19)   | 0.33<br>(0.12,0.86)   | 0.11<br>(0.03,0.39)   | 2.82<br>(0.66,11.96)    | 1.68<br>(0.59,4.81)     | 1.41<br>(0.18,10.8)     | 0.18<br>(0.02,1.92)   | 1.02<br>(0.11,9.6)      | 1.3<br>(0.49,3.43)      | 0.07<br>(0.4,24)     | 1.29<br>(0.18,9.3)      | 1.48<br>(0.33,6.59)     | SITA                   | 1.75<br>(0.36,8.39)     |
| 1.47<br>(0.03,63)       | 4.56<br>(0.2,105.83)     | 0.82<br>(0.14,4.89)   | 0.77<br>(0.11,5.3)      | 1.47<br>(0.23,9.15)     | 1.97<br>(0.14,28.31)   | 0.41<br>(0.07,2.37)    | 0.11<br>(0.01,1.17)  | 0.07<br>(0.01,0.85)   | 0.19<br>(0.05,0.71)   | 0.06<br>(0.01,0.4)    | 1.61<br>(0.29,9.13)     | 0.96<br>(0.17,5.35)     | 0.81<br>(0.08,7.66)     | 0.1<br>(0.01,1.34)    | 0.58<br>(0.05,6.71)     | 0.75<br>(0.19,2.97)     | 0.04<br>(0.2,73)     | 0.74<br>(0.08,6.96)     | 0.85<br>(0.11,6.57)     | 0.57<br>(0.12,2.75)    | VILDA                   |
