# Supplementary material for: Comparative Efficacy and Safety of Antidiabetic Drug Regimens Added to Metformin Monotherapy in Patients with Type 2 Diabetes: A Network Meta-Analysis
Source: PubMed Central journal article supplement (PMC4412636; doi:10.1371/journal.pone.0125879), 2015-04-28
Supplement: pone.0125879.s016.pdf [file pone.0125879.s016.pdf]

**Figure S13. Sensitivity Analysis Results of the Effect of Antidiabetic Therapies on Risk of Urinary Tract Infections**

|                      |                      |                     |                     |                      |                     |                      |                      |                      |                     |                     |                     |                      |                      |
|----------------------|----------------------|---------------------|---------------------|----------------------|---------------------|----------------------|----------------------|----------------------|---------------------|---------------------|---------------------|----------------------|----------------------|
| <b>ALO/PIO</b>       | 0.83<br>(0.36,1.93)  | 0.7<br>(0.22,2.24)  | 0.68<br>(0.21,2.25) | 1.45<br>(0.38,5.46)  | 1.02<br>(0.33,3.14) | 0.99<br>(0.32,3.03)  | 1.6<br>(0.44,5.84)   | 0.92<br>(0.29,2.93)  | 0.62<br>(0.31,1.25) | 0.87<br>(0.33,2.34) | 0.74<br>(0.23,2.35) | 0.91<br>(0.29,2.85)  | 0.97<br>(0.08,12.12) |
| 1.21<br>(0.52,2.81)  | <b>ALO</b>           | 0.85<br>(0.27,2.61) | 0.82<br>(0.26,2.63) | 1.75<br>(0.48,6.4)   | 1.23<br>(0.41,3.67) | 1.19<br>(0.4,3.53)   | 1.93<br>(0.55,6.85)  | 1.11<br>(0.36,3.42)  | 0.75<br>(0.31,1.81) | 1.06<br>(0.41,2.72) | 0.89<br>(0.29,2.74) | 1.1<br>(0.37,3.33)   | 1.18<br>(0.1,14.41)  |
| 1.43<br>(0.45,4.56)  | 1.18<br>(0.38,3.66)  | <b>CANA</b>         | 0.97<br>(0.45,2.12) | 2.07<br>(0.83,5.17)  | 1.46<br>(0.81,2.61) | 1.41<br>(0.83,2.39)  | 2.29<br>(0.94,5.54)  | 1.32<br>(0.69,2.51)  | 0.89<br>(0.27,2.92) | 1.25<br>(0.67,2.32) | 1.05<br>(0.48,2.28) | 1.31<br>(0.69,2.46)  | 1.39<br>(0.13,15.36) |
| 1.47<br>(0.44,4.83)  | 1.21<br>(0.38,3.88)  | 1.03<br>(0.47,2.23) | <b>DAPA</b>         | 2.12<br>(0.8,5.64)   | 1.5<br>(0.76,2.94)  | 1.45<br>(0.77,2.73)  | 2.35<br>(0.84,6.55)  | 1.35<br>(0.65,2.8)   | 0.92<br>(0.27,3.09) | 1.28<br>(0.65,2.51) | 1.08<br>(0.45,2.6)  | 1.34<br>(0.59,3.04)  | 1.43<br>(0.13,16.01) |
| 0.69<br>(0.18,2.61)  | 0.57<br>(0.16,2.1)   | 0.48<br>(0.19,1.21) | 0.47<br>(0.18,1.25) | <b>EMPA/LINA</b>     | 0.71<br>(0.33,1.49) | 0.68<br>(0.32,1.47)  | 1.11<br>(0.35,3.52)  | 0.64<br>(0.3,1.37)   | 0.43<br>(0.11,1.66) | 0.6<br>(0.25,1.48)  | 0.51<br>(0.18,1.44) | 0.63<br>(0.24,1.68)  | 0.67<br>(0.06,8.09)  |
| 0.98<br>(0.32,3.02)  | 0.81<br>(0.27,2.42)  | 0.69<br>(0.38,1.23) | 0.67<br>(0.34,1.32) | 1.42<br>(0.67,2.99)  | <b>EMPA</b>         | 0.97<br>(0.71,1.31)  | 1.57<br>(0.63,3.92)  | 0.91<br>(0.58,1.42)  | 0.61<br>(0.19,1.93) | 0.86<br>(0.5,1.48)  | 0.72<br>(0.34,1.55) | 0.9<br>(0.46,1.76)   | 0.96<br>(0.09,10.37) |
| 1.01<br>(0.33,3.11)  | 0.84<br>(0.28,2.49)  | 0.71<br>(0.42,1.2)  | 0.69<br>(0.37,1.3)  | 1.47<br>(0.68,3.16)  | 1.03<br>(0.76,1.4)  | <b>GLIM</b>          | 1.62<br>(0.66,4)     | 0.94<br>(0.62,1.41)  | 0.63<br>(0.2,1.99)  | 0.89<br>(0.52,1.52) | 0.75<br>(0.35,1.59) | 0.93<br>(0.48,1.79)  | 0.99<br>(0.09,10.69) |
| 0.62<br>(0.17,2.28)  | 0.52<br>(0.15,1.83)  | 0.44<br>(0.18,1.06) | 0.43<br>(0.15,1.19) | 0.9<br>(0.28,2.88)   | 0.64<br>(0.26,1.59) | 0.62<br>(0.25,1.52)  | <b>GLIP</b>          | 0.58<br>(0.22,1.5)   | 0.39<br>(0.1,1.45)  | 0.55<br>(0.24,1.27) | 0.46<br>(0.19,1.09) | 0.57<br>(0.31,1.06)  | 0.61<br>(0.05,7.18)  |
| 1.08<br>(0.34,3.44)  | 0.9<br>(0.29,2.75)   | 0.76<br>(0.4,1.44)  | 0.74<br>(0.36,1.53) | 1.57<br>(0.73,3.36)  | 1.1<br>(0.7,1.73)   | 1.07<br>(0.71,1.6)   | 1.73<br>(0.67,4.51)  | <b>LINA</b>          | 0.68<br>(0.21,2.2)  | 0.95<br>(0.52,1.73) | 0.8<br>(0.35,1.8)   | 0.99<br>(0.48,2.06)  | 1.05<br>(0.1,11.6)   |
| 1.6<br>(0.8,3.21)    | 1.33<br>(0.55,3.18)  | 1.12<br>(0.34,3.67) | 1.09<br>(0.32,3.68) | 2.32<br>(0.6,8.93)   | 1.63<br>(0.52,5.16) | 1.58<br>(0.5,4.97)   | 2.56<br>(0.69,9.55)  | 1.48<br>(0.45,4.81)  | <b>PIO</b>          | 1.4<br>(0.51,3.85)  | 1.18<br>(0.36,3.85) | 1.46<br>(0.46,4.68)  | 1.56<br>(0.12,19.62) |
| 1.14<br>(0.43,3.06)  | 0.95<br>(0.37,2.44)  | 0.8<br>(0.43,1.49)  | 0.78<br>(0.4,1.53)  | 1.65<br>(0.68,4.04)  | 1.17<br>(0.68,2.01) | 1.13<br>(0.66,1.93)  | 1.83<br>(0.79,4.24)  | 1.06<br>(0.58,1.93)  | 0.71<br>(0.26,1.97) | <b>PLC</b>          | 0.84<br>(0.46,1.55) | 1.05<br>(0.59,1.85)  | 1.11<br>(0.11,11.35) |
| 1.36<br>(0.43,4.33)  | 1.13<br>(0.36,3.47)  | 0.95<br>(0.44,2.06) | 0.93<br>(0.38,2.23) | 1.96<br>(0.69,5.57)  | 1.39<br>(0.64,2.98) | 1.34<br>(0.63,2.86)  | 2.17<br>(0.92,5.16)  | 1.25<br>(0.56,2.83)  | 0.85<br>(0.26,2.77) | 1.19<br>(0.64,2.19) | <b>SAX</b>          | 1.24<br>(0.68,2.27)  | 1.32<br>(0.12,14.59) |
| 1.09<br>(0.35,3.41)  | 0.91<br>(0.3,2.73)   | 0.77<br>(0.41,1.44) | 0.75<br>(0.33,1.69) | 1.58<br>(0.59,4.21)  | 1.12<br>(0.57,2.19) | 1.08<br>(0.56,2.09)  | 1.75<br>(0.94,3.25)  | 1.01<br>(0.49,2.1)   | 0.68<br>(0.21,2.18) | 0.96<br>(0.54,1.69) | 0.81<br>(0.44,1.47) | <b>SITA</b>          | 1.07<br>(0.1,11.63)  |
| 1.03<br>(0.08,12.76) | 0.85<br>(0.07,10.41) | 0.72<br>(0.07,7.93) | 0.7<br>(0.06,7.84)  | 1.48<br>(0.12,17.83) | 1.05<br>(0.1,11.35) | 1.01<br>(0.09,10.96) | 1.64<br>(0.14,19.38) | 0.95<br>(0.09,10.43) | 0.64<br>(0.05,8.06) | 0.9<br>(0.09,9.13)  | 0.76<br>(0.07,8.33) | 0.94<br>(0.09,10.23) | <b>VILDA</b>         |
