# Supplementary material for: Comparative Efficacy and Safety of Antidiabetic Drug Regimens Added to Metformin Monotherapy in Patients with Type 2 Diabetes: A Network Meta-Analysis
Source: PubMed Central journal article supplement (PMC4412636; doi:10.1371/journal.pone.0125879), 2015-04-28
Supplement: pone.0125879.s017.pdf [file pone.0125879.s017.pdf]

**Figure S14. Sensitivity Analysis Results of the Effect of Antidiabetic Therapies on Risk of Genital Tract Infections**

|                     |                      |                      |                     |                      |                        |                        |                      |                      |
|---------------------|----------------------|----------------------|---------------------|----------------------|------------------------|------------------------|----------------------|----------------------|
| <b>CANA</b>         | 3.72<br>(0.56,24.53) | 2.72<br>(0.64,11.55) | 1.17<br>(0.44,3.15) | 6.25<br>(2.68,14.58) | 16.99<br>(2.14,134.64) | 10.49<br>(0.63,173.66) | 8.03<br>(1.68,38.36) | 3.44<br>(1.27,9.33)  |
| 0.27<br>(0.04,1.78) | <b>DAPA</b>          | 0.73<br>(0.08,6.88)  | 0.32<br>(0.04,2.28) | 1.68<br>(0.24,12.01) | 4.57<br>(1.95,10.7)    | 2.82<br>(0.11,75.56)   | 2.16<br>(0.75,6.21)  | 0.93<br>(0.12,7.11)  |
| 0.37<br>(0.09,1.56) | 1.37<br>(0.15,12.85) | <b>EMPA/LINA</b>     | 0.43<br>(0.15,1.24) | 2.3<br>(0.67,7.91)   | 6.25<br>(0.57,68.64)   | 3.86<br>(0.25,59.17)   | 2.95<br>(0.41,21.3)  | 1.27<br>(0.25,6.42)  |
| 0.85<br>(0.32,2.29) | 3.17<br>(0.44,22.84) | 2.32<br>(0.81,6.66)  | <b>EMPA</b>         | 5.33<br>(2.81,10.1)  | 14.48<br>(1.68,124.41) | 8.94<br>(0.65,123.64)  | 6.84<br>(1.29,36.33) | 2.93<br>(0.85,10.07) |
| 0.16<br>(0.07,0.37) | 0.59<br>(0.08,4.24)  | 0.43<br>(0.13,1.49)  | 0.19<br>(0.1,0.36)  | <b>GLIM</b>          | 2.72<br>(0.32,23.12)   | 1.68<br>(0.11,25.06)   | 1.28<br>(0.24,6.73)  | 0.55<br>(0.17,1.81)  |
| 0.06<br>(0.01,0.47) | 0.22<br>(0.09,0.51)  | 0.16<br>(0.01,1.76)  | 0.07<br>(0.01,0.59) | 0.37<br>(0.04,3.13)  | <b>GLIP</b>            | 0.62<br>(0.02,18.41)   | 0.47<br>(0.12,1.83)  | 0.2<br>(0.02,1.84)   |
| 0.1<br>(0.01,1.58)  | 0.35<br>(0.01,9.49)  | 0.26<br>(0.02,3.98)  | 0.11<br>(0.01,1.55) | 0.6<br>(0.04,8.91)   | 1.62<br>(0.05,48.33)   | <b>LINA</b>            | 0.77<br>(0.03,17.21) | 0.33<br>(0.02,5.98)  |
| 0.12<br>(0.03,0.6)  | 0.46<br>(0.16,1.33)  | 0.34<br>(0.05,2.44)  | 0.15<br>(0.03,0.78) | 0.78<br>(0.15,4.09)  | 2.12<br>(0.55,8.21)    | 1.31<br>(0.06,29.39)   | <b>PLC</b>           | 0.43<br>(0.07,2.45)  |
| 0.29<br>(0.11,0.79) | 1.08<br>(0.14,8.3)   | 0.79<br>(0.16,4.01)  | 0.34<br>(0.1,1.17)  | 1.82<br>(0.55,5.98)  | 4.94<br>(0.54,44.99)   | 3.05<br>(0.17,55.56)   | 2.33<br>(0.41,13.35) | <b>SITA</b>          |
