# Supplementary material for: Comparative Efficacy and Safety of Antidiabetic Drug Regimens Added to Metformin Monotherapy in Patients with Type 2 Diabetes: A Network Meta-Analysis
Source: PubMed Central journal article supplement (PMC4412636; doi:10.1371/journal.pone.0125879), 2015-04-28
Supplement: pone.0125879.s018.pdf [file pone.0125879.s018.pdf]

**Table S1. Baseline Characteristics of Randomized Controlled Trials Evaluating Antidiabetic Therapies in Addition to Metformin in Adults with Type 2 Diabetes**

| Author, Year N <sup>a</sup> | Follow Up, weeks | Inclusion criteria                                                                                                                                                                               | Interventions Evaluated <sup>b</sup>     | Population Characteristics (Age, mean, years (SE); Males, %) | Baseline HbA <sub>1c</sub> , mean, % (SE) | SBP, mean, mmHg (SE) | Baseline weight, mean, kg (SE) | Baseline BMI, mean, kg/m <sup>2</sup> (SE) | Duration of DM, mean, years (SE) |
|-----------------------------|------------------|--------------------------------------------------------------------------------------------------------------------------------------------------------------------------------------------------|------------------------------------------|--------------------------------------------------------------|-------------------------------------------|----------------------|--------------------------------|--------------------------------------------|----------------------------------|
| Defronzo 2014 N=674         | 24               | HbA <sub>1c</sub> : 7-10.5%<br>Stable therapy for ≥12 weeks<br>Metformin Dose: ≥1500 mg/d (or maximum tolerated dose)<br>BMI: ≤45 kg/m <sup>2</sup><br>FPG: < 250 mg/dl                          | Empagliflozin 25 mg /Linagliptin 5 mg QD | Age: 57.1 (0.88)<br>Males: 54%                               | 7.9 (0.07)                                | 130.9 (1.35)         | 85.5 (1.76)                    | NR                                         | 58.2% >5 years                   |
|                             |                  |                                                                                                                                                                                                  | Empagliflozin 10 mg /Linagliptin 5 mg QD | Age: 56.2 (0.89)<br>Males: 62%                               | 8.0 (0.07)                                | 130.5 (1.31)         | 86.6 (1.64)                    | NR                                         | 49.7% >5 years                   |
|                             |                  |                                                                                                                                                                                                  | Empagliflozin 25 mg QD                   | Age: 55.5 (0.85)<br>Males: 46%                               | 8.0 (0.07)                                | 129.2 (1.14)         | 87.7 (1.49)                    | NR                                         | 57.1% >5 years                   |
|                             |                  |                                                                                                                                                                                                  | Empagliflozin 10 mg QD                   | Age: 56.1 (0.90)<br>Males: 57%                               | 8.0 (0.08)                                | 131.6 (1.23)         | 86.1 (1.55)                    | NR                                         | 53.3% >5 years                   |
|                             |                  |                                                                                                                                                                                                  | Linagliptin 5 mg QD                      | Age: 56.2 (0.88)<br>Males: 50%                               | 8.0 (0.08)                                | 128.4 (1.11)         | 85.0 (1.62)                    | NR                                         | 57.8% >5 years                   |
| Bolli 2014 N=484            | 24               | HbA <sub>1c</sub> : 7-10%<br>Stable therapy for ≥12 weeks<br>Metformin Dose: ≥1500 mg/d<br>FPG: < 250 mg/dl                                                                                      | Lixisenatide 20 µg, 1-step titration QD  | Age: 55.4 (0.70)<br>Males: 44%                               | 8.0 (0.07)                                | NR                   | 90.3 (1.50)                    | 33.0 (0.46)                                | 5.8 (0.31)                       |
|                             |                  |                                                                                                                                                                                                  | Lixisenatide 20 µg, 2-step titration QD  | Age: 54.6 (0.70)<br>Males: 45%                               | 8.1 (0.07)                                | NR                   | 88.0 (1.32)                    | 32.1 (0.38)                                | 6.0 (0.36)                       |
|                             |                  |                                                                                                                                                                                                  | Placebo                                  | Age: 58.2 (0.77)<br>Males: 45%                               | 8.0 (0.06)                                | NR                   | 87.9 (1.37)                    | 32.4 (0.43)                                | 6.2 (0.37)                       |
| Derosa 2014 N=167           | 26               | HbA <sub>1c</sub> : 7-9%<br>Metformin Dose: Maximum tolerated dose                                                                                                                               | Glimepiride 2 mg TID                     | Age: 57.2 (1.00)<br>Males: 50%                               | 7.7 (0.08)                                | NR                   | 77.0 (0.70)                    | 27.6 (0.14)                                | 0.57 (0.03)                      |
|                             |                  |                                                                                                                                                                                                  | Vildagliptin 50 mg BID                   | Age: 59.8 (1.07)<br>Males: 49%                               | 7.9 (0.10)                                | NR                   | 77.8 (0.74)                    | 27.9 (0.17)                                | 0.58 (0.04)                      |
| Haring 2014 N=637           | 24               | HbA <sub>1c</sub> : 7-10%<br>Stable therapy for ≥12 weeks<br>Metformin Dose: ≥1500 mg/d (or maximum tolerated dose)<br>BMI: ≤45 kg/m <sup>2</sup>                                                | Empagliflozin 10 mg QD                   | Age: 55.5 (0.67)<br>Males: 58%                               | 7.9 (0.05)                                | 129.6 (0.96)         | 81.6 (1.26)                    | 29.1 (0.37)                                | 55% >5 years                     |
|                             |                  |                                                                                                                                                                                                  | Empagliflozin 25 mg QD                   | Age: 55.6 (0.70)<br>Males: 56%                               | 7.9 (0.06)                                | 130.0 (1.03)         | 82.2 (1.32)                    | 29.7 (0.39)                                | 59% >5 years                     |
|                             |                  |                                                                                                                                                                                                  | Placebo                                  | Age: 56.0 (0.67)<br>Males: 56%                               | 7.9 (0.06)                                | 128.6 (1.02)         | 79.7 (1.29)                    | 28.7 (0.36)                                | 50% >5 years                     |
| Nauck 2014 N=1098           | 26               | HbA <sub>1c</sub> : 7-9.5%<br>≥6 week lead-in for washout of other OADs and stabilize with metformin ≥1500 mg/d<br>BMI: 25-40 kg/m <sup>2</sup><br>Weight: Stable for ≥12 weeks before screening | Sitagliptin 100 mg QD                    | Age: 54 (0.56)<br>Males: 48%                                 | 8.1 (0.06)                                | 127 (0.73)           | 86 (0.96)                      | 31 (0.23)                                  | 7 (0.28)                         |
|                             |                  |                                                                                                                                                                                                  | Placebo                                  | Age: 55 (0.68)<br>Males: 51%                                 | 8.1 (0.08)                                | 128 (0.98)           | 87 (1.28)                      | 31 (0.30)                                  | 7 (0.38)                         |
| Ridderstråle 2014 N=1549    | 52               | HbA <sub>1c</sub> : 7-10%<br>BMI: ≤45 kg/m <sup>2</sup><br>Stable therapy for ≥12 weeks<br>Metformin Dose: ≥1500 mg/d (or maximum tolerated dose)                                                | Empagliflozin 25mg QD                    | Age: 56.2 (0.37)<br>Males: 56%                               | 7.9 (0.03)                                | 133.4 (0.54)         | 82.5 (0.69)                    | 30.0 (0.19)                                | 45% >5 years                     |
|                             |                  |                                                                                                                                                                                                  | Glimepiride 1-4mg QD                     | Age: 55.7 (0.37)<br>Males: 54%                               | 7.9 (0.03)                                | 133.5 (0.57)         | 83.0 (0.69)                    | 30.3 (0.19)                                | 45% >5 years                     |

|                                             |    |                                                                                                                                                                                           |                                                  |                                |            |              |             |             |            |
|---------------------------------------------|----|-------------------------------------------------------------------------------------------------------------------------------------------------------------------------------------------|--------------------------------------------------|--------------------------------|------------|--------------|-------------|-------------|------------|
| <b>White<br/>2014<br/>N=160</b>             | 12 | HbA1c: 7-10%<br>Stable therapy for ≥8 weeks<br>Metformin Dose: ≥1500 mg/d<br>BMI: ≤45 kg/m <sup>2</sup>                                                                                   | Saxagliptin 2.5 mg BID                           | Age: 53.9 (1.20)<br>Males: 54% | 7.9 (0.11) | 128.2 (1.76) | NR          | 33.7 (0.69) | 5.8 (0.74) |
|                                             |    |                                                                                                                                                                                           | Placebo                                          | Age: 56.6 (1.08)<br>Males: 52% | 8.0 (0.09) | 127.4 (1.56) | NR          | 32.5 (0.67) | 6.2 (0.45) |
| <b>Charbonnel<br/>2013<br/>N=653</b>        | 26 | HbA1c: 7-11%<br>Stable therapy for ≥12 weeks<br>Metformin Dose: ≥1500 mg/d<br>FPG: <270 mg/dl                                                                                             | Sitagliptin 100 mg QD                            | Age: 56.9 (0.55)<br>Males: 55% | 8.2 (0.06) | 130.0 (0.89) | 91.0 (1.14) | 32.6 (0.33) | 7.6 (0.27) |
|                                             |    |                                                                                                                                                                                           | Liraglutide 1.2 mg QD                            | Age: 57.6 (0.60)<br>Males: 55% | 8.1 (0.05) | 131.9 (0.90) | 92.1 (1.13) | 32.7 (0.34) | 8.2 (0.34) |
| <b>Chawla<br/>2013<br/>N=52</b>             | 16 | HbA1c: 7.5-11%<br>Stable therapy for ≥4 weeks<br>Metformin Dose: ≥1500 mg/d<br>FPG: ≥140 mg/dl                                                                                            | Sitagliptin 100 mg QD                            | Age: 49.5 (1.94)<br>Males: 60% | 8.1 (0.14) | NR           | 72.1 (2.76) | 29.0 (0.99) | 4.1 (0.74) |
|                                             |    |                                                                                                                                                                                           | Pioglitazone 30 mg QD                            | Age: 52.2 (1.90)<br>Males: 56% | 8.2 (0.16) | NR           | 72.7 (2.15) | 28.7 (0.75) | 4.5 (0.73) |
| <b>Cefalu<br/>2013<br/>N=1450</b>           | 52 | HbA1c: 7.0-9.5%<br>Stable therapy for ≥10 weeks<br>Metformin ≥2000 mg/d (or 1500 mg/d if unable to tolerate a higher dose). If lower dose, then up to a 12 week dose-stable run-in period | Glimepiride 6 to 8 mg QD                         | Age: 56.3 (0.41)<br>Males: 55% | 7.8 (0.04) | 129.5 (0.62) | 86.5 (0.90) | 30.9 (0.25) | 6.6 (0.23) |
|                                             |    |                                                                                                                                                                                           | Canagliflozin 100 mg QD                          | Age: 56.4 (0.43)<br>Males: 52% | 7.8 (0.04) | 130.0 (0.57) | 86.9 (0.91) | 31.0 (0.24) | 6.5 (0.25) |
|                                             |    |                                                                                                                                                                                           | Canagliflozin 300 mg QD                          | Age: 55.8 (0.42)<br>Males: 50% | 7.8 (0.04) | 130.0 (0.63) | 86.6 (0.89) | 31.2 (0.25) | 6.7 (0.25) |
| <b>Derosa<br/>2013<br/>N=167</b>            | 52 | HbA1c: >8.0%<br>35±8 week run-in of metformin 2500±500 mg/d<br>BMI: 25-30 kg/m <sup>2</sup>                                                                                               | Vildagliptin 50 mg BID                           | Age: 54.2 (0.91)<br>Males: 50% | 8.1 (0.07) | NR           | 76.9 (0.63) | 27.9 (0.16) | 0.5 (0.03) |
|                                             |    |                                                                                                                                                                                           | Placebo                                          | Age: 52.4 (0.78)<br>Males: 52% | 8.2 (0.08) | NR           | 78.5 (0.70) | 27.8 (0.15) | 0.5 (0.04) |
| <b>Lavalle-González<br/>2013<br/>N=1284</b> | 26 | HbA1c: 7-10.5%<br>FPG: <15mmol/l<br>Stable therapy for ≥8 weeks<br>Metformin Dose: ≥2000 mg/d (≥1500 mg/d if unable to tolerate higher dose)                                              | Canagliflozin 100 mg QD                          | Age: 55.5 (0.49)<br>Males: 47% | 7.9 (0.05) | 128.0 (0.66) | 88.8 (1.16) | 32.4 (0.33) | 6.7 (0.28) |
|                                             |    |                                                                                                                                                                                           | Canagliflozin 300 mg QD                          | Age: 55.3 (0.48)<br>Males: 45% | 7.9 (0.05) | 128.7 (0.69) | 85.4 (1.09) | 31.4 (0.33) | 7.1 (0.28) |
|                                             |    |                                                                                                                                                                                           | Sitagliptin 100 mg QD                            | Age: 55.5 (0.50)<br>Males: 47% | 7.9 (0.05) | 128.0 (0.71) | 87.7 (1.13) | 32.0 (0.32) | 6.8 (0.27) |
|                                             |    |                                                                                                                                                                                           | Placebo                                          | Age: 55.3 (0.72)<br>Males: 51% | 8.0 (0.07) | 128.0 (0.94) | 86.6 (1.66) | 31.1 (0.45) | 6.8 (0.39) |
| <b>Rosenstock<br/>2013<br/>N=495</b>        | 12 | HbA1c: 6.5-9%<br>Stable therapy for ≥10 weeks<br>Metformin Dose: ≥1500 mg/d (or maximum tolerated dose)<br>4 week washout of other OADs<br>BMI: ≤40 kg/m <sup>2</sup>                     | Empagliflozin 10 mg QD                           | Age: 59 (1.07)<br>Males: 47%   | 7.9 (0.08) | 132.4 (NR)   | 87.9 (1.71) | 31.4 (0.47) | NR         |
|                                             |    |                                                                                                                                                                                           | Empagliflozin 25 mg QD                           | Age: 59 (0.97)<br>Males: 53%   | 8.1 (0.10) | 135.3 (NR)   | 90.5 (2.02) | 31.5 (0.57) | NR         |
|                                             |    |                                                                                                                                                                                           | Sitagliptin 100 mg QD                            | Age: 58 (1.20)<br>Males: 54%   | 8.1 (0.11) | 135.5 (NR)   | 88.0 (1.78) | 31.0 (0.53) | NR         |
|                                             |    |                                                                                                                                                                                           | Placebo                                          | Age: 60 (1.01)<br>Males: 47%   | 8.0 (0.08) | 136.0 (NR)   | 87.7 (1.86) | 31.3 (0.53) | NR         |
| <b>Rosenstock<br/>2013<br/>N=634</b>        | 24 | HbA1c: 7-10%<br>Stable therapy for ≥12 weeks<br>Metformin Dose: ≥1500 mg/d<br>FPG: >250 mg/dl                                                                                             | Lixisenatide 20 µg, 2-step titration QD          | Age: 57.3 (0.52)<br>Males: 48% | 8.0 (0.04) | NR           | 94.0 (1.10) | 33.7 (0.35) | 6.8 (0.31) |
|                                             |    |                                                                                                                                                                                           | Exenatide 10 µg BID                              | Age: 57.6 (0.60)<br>Males: 59% | 8.0 (0.05) | NR           | 96.1 (1.27) | 33.5 (0.37) | 6.8 (0.28) |
| <b>Aschner<br/>2012<br/>N=515</b>           | 24 | HbA1c: 7-11%<br>Stable therapy for ≥8 weeks<br>Metformin Dose: ≥1000 mg/d<br>BMI: 25-45 kg/m <sup>2</sup><br>FPG: <15.4 mmol/L                                                            | Insulin glargine titrated to FPG 4-5.5 mmol/L QD | Age 53.9 (0.59)<br>Males: 50%  | 8.5 (0.07) | 129.8 (0.88) | 83.4 (1.21) | 31.1 (0.33) | 3.9 (NR)   |
|                                             |    |                                                                                                                                                                                           | Sitagliptin 100 mg QD                            | Age: 53.3 (0.55)<br>Males: 52% | 8.5 (0.07) | 131.7 (0.95) | 84.2 (1.15) | 31.3 (0.31) | 4.8 (NR)   |

|                                             |                                |                                                                                                                                                                                                                                                             |                                               |                                |             |              |             |             |            |
|---------------------------------------------|--------------------------------|-------------------------------------------------------------------------------------------------------------------------------------------------------------------------------------------------------------------------------------------------------------|-----------------------------------------------|--------------------------------|-------------|--------------|-------------|-------------|------------|
| <b>Bergental<br/>2012<br/>N=666</b>         | 24                             | HbA1c: 7-10%<br>Stable therapy for ≥12 weeks<br>Metformin Dose: ≥1500 mg/d<br>(or maximum tolerated dose)<br>BMI: ≥25 kg/m <sup>2</sup> (or >23 kg/m <sup>2</sup><br>for Asian patients)<br>Weight: Stable (<5% variance)<br>for ≥12 weeks before screening | Sitagliptin 100 mg QD                         | Age: 55.5 (0.74)<br>Males: 59% | 8.0 (0.06)  | NR           | 92.5 (1.48) | 32.4 (0.38) | 6.0 (0.38) |
|                                             |                                |                                                                                                                                                                                                                                                             | Placebo                                       | Age: 56.1 (1.06)<br>Males: 52% | 8.0 (0.09)  | NR           | 91.1 (2.00) | 32.5 (0.58) | 5.5 (0.41) |
| <b>DeFronzo<br/>2012<br/>N=1554</b>         | 26                             | HbA1c: 7.5-10%<br>Stable therapy for ≥8 weeks<br>Metformin Dose: ≥1500 mg/d<br>If on 1000mg metformin, then<br>titration to 1500mg for 2 weeks<br>then optional 12 week<br>stabilization<br>BMI: 23-45 kg/m <sup>2</sup>                                    | Placebo                                       | Age: 55.2 (0.87)<br>Males: 47% | 8.5 (0.05)  | NR           | NR          | 30.6 (0.42) | 6.0 (0.44) |
|                                             |                                |                                                                                                                                                                                                                                                             | Alogliptin 12.5 mg QD                         | Age: 53.1 (0.85)<br>Males: 52% | 8.6 (0.06)  | NR           | NR          | 31 (0.45)   | 6.2 (0.49) |
|                                             |                                |                                                                                                                                                                                                                                                             | Alogliptin 25 mg QD                           | Age: 53.7 (0.82)<br>Males: 39% | 8.6 (0.06)  | NR           | NR          | 31.5 (0.50) | 5.6 (0.43) |
|                                             |                                |                                                                                                                                                                                                                                                             | Pioglitazone 15 mg QD                         | Age: 54.1 (0.83)<br>Males: 47% | 8.5 (0.06)  | NR           | NR          | 31.3 (0.46) | 5.7 (0.42) |
|                                             |                                |                                                                                                                                                                                                                                                             | Pioglitazone 30 mg QD                         | Age: 56.1 (0.83)<br>Males: 49% | 8.5 (0.06)  | NR           | NR          | 31.4 (0.48) | 7.6 (0.63) |
|                                             |                                |                                                                                                                                                                                                                                                             | Pioglitazone 45 mg QD                         | Age: 54.5 (0.85)<br>Males: 41% | 8.5 (0.06)  | NR           | NR          | 30.7 (0.41) | 5.7 (0.37) |
|                                             |                                |                                                                                                                                                                                                                                                             | Alogliptin 12.5 mg +<br>pioglitazone 15 mg QD | Age: 53.6 (0.87)<br>Males: 46% | 8.5 (0.06)  | NR           | NR          | 31.5 (0.44) | 6.1 (0.48) |
|                                             |                                |                                                                                                                                                                                                                                                             | Alogliptin 12.5 mg +<br>pioglitazone 30 mg QD | Age: 55.0 (0.80)<br>Males: 42% | 8.5 (0.06)  | NR           | NR          | 31.1 (0.45) | 5.8 (0.45) |
|                                             |                                |                                                                                                                                                                                                                                                             | Alogliptin 12.5 mg +<br>pioglitazone 45 mg QD | Age: 54.0 (0.86)<br>Males: 46% | 8.5 (0.06)  | NR           | NR          | 31.5 (0.46) | 6.6 (0.46) |
|                                             |                                |                                                                                                                                                                                                                                                             | Alogliptin 25 mg +<br>pioglitazone 15 mg QD   | Age: 54.9 (0.81)<br>Males: 47% | 8.5 (0.06)  | NR           | NR          | 30.8 (0.41) | 6.9 (0.48) |
|                                             |                                |                                                                                                                                                                                                                                                             | Alogliptin 25 mg +<br>pioglitazone 30 mg QD   | Age: 54.4 (0.85)<br>Males: 42% | 8.5 (0.06)  | NR           | NR          | 31.9 (0.49) | 6.6 (0.53) |
| Alogliptin 25 mg +<br>pioglitazone 45 mg QD | Age: 54.2 (0.78)<br>Males: 40% | 8.6 (0.06)                                                                                                                                                                                                                                                  | NR                                            | NR                             | 30.6 (0.42) | 6.2 (0.44)   |             |             |            |
| <b>Derosa<br/>2012<br/>N=174</b>            | 52                             | HbA1c: 8-11%<br>8+/-2 month run-in period with<br>2500+/-500 mg/d<br>BMI: 25-30 kg/m <sup>2</sup>                                                                                                                                                           | Exenatide 10 µg BID                           | Age: 57.3 (0.83)<br>Males: 50% | 8.1 (0.09)  | NR           | 89.0 (1.05) | 31.9 (0.18) | 0.6 (0.02) |
|                                             |                                |                                                                                                                                                                                                                                                             | Placebo                                       | Age: 56.7 (0.79)<br>Males: 48% | 7.9 (0.07)  | NR           | 90.5 (1.12) | 31.7 (0.16) | 0.7 (0.03) |
| <b>Derosa<br/>2012<br/>N=178</b>            | 52                             | HbA1c: >8%<br>8+/-2 month run-in period with<br>2500+/-500 mg/d<br>BMI: 25-30 kg/m <sup>2</sup>                                                                                                                                                             | Sitagliptin 100 mg QD                         | Age: 55.9 (0.92)<br>Males: 46% | 8.1 (0.08)  | NR           | 78.4 (0.69) | 28.1 (0.13) | 0.5 (0.02) |
|                                             |                                |                                                                                                                                                                                                                                                             | Placebo                                       | Age: 54.8 (0.85)<br>Males: 51% | 8.0 (0.08)  | NR           | 78.6 (0.72) | 28.9 (0.21) | 0.5 (0.02) |
| <b>Gallwitz<br/>2012<br/>N=1029</b>         | 52                             | HbA1c: 6.5-9%<br>Stable therapy for ≥12 weeks<br>Metformin Dose: Max tolerated<br>dose<br>BMI: 25-40 kg/m <sup>2</sup>                                                                                                                                      | Exenatide 10 µg BID                           | Age: 56 (0.45)<br>Males: 56%   | 7.5 (0.03)  | 132.8 (0.71) | 92.8 (0.75) | 32.6 (0.19) | 5.8 (0.22) |
|                                             |                                |                                                                                                                                                                                                                                                             | Glimepiride, up to<br>maximum tolerable dose  | Age: 56 (0.41)<br>Males: 52%   | 7.4 (0.03)  | 133.4 (0.68) | 91.1 (0.67) | 32.3 (0.18) | 5.5 (0.19) |

|                                         |    |                                                                                                                                                                                                |                         |                                |            |            |             |             |                |
|-----------------------------------------|----|------------------------------------------------------------------------------------------------------------------------------------------------------------------------------------------------|-------------------------|--------------------------------|------------|------------|-------------|-------------|----------------|
| <b>Gallwitz<br/>2012<br/>N=1551</b>     | 52 | HbA <sub>1c</sub> : 6.5-10%<br>Metformin Dose: ≥1500 mg/d<br>(or maximum tolerated dose)<br>BMI: ≤40 kg/m <sup>2</sup><br>If on dual therapy, entered<br>6week washout period                  | Linagliptin 5 mg QD     | Age: 59.8 (0.34)<br>Males: 60% | 7.7 (0.03) | NR         | 86.1 (0.63) | 30.2 (0.17) | 52 % >5 years  |
|                                         |    |                                                                                                                                                                                                | Glimepiride 1-4 mg QD   | Age: 59.8 (0.34)<br>Males: 61% | 7.7 (0.03) | NR         | 86.8 (0.60) | 30.3 (0.17) | 54% >5 years   |
| <b>Ljunggren<br/>2012<br/>N=182</b>     | 50 | HbA <sub>1c</sub> : 6.5-8.5%<br>Stable therapy for ≥12 weeks<br>Metformin Dose: ≥1500 mg/d<br>BMI: ≥25 kg/m <sup>2</sup><br>Weight: ≤120 kg<br>FPG: ≤237.8 mg/dl                               | Dapagliflozin 10 mg QD  | Age: 60.6 (0.87)<br>Males: 55% | 7.2 (0.06) | NR         | 92.1 (1.49) | 32.1 (0.41) | 6.0 (0.48)     |
|                                         |    |                                                                                                                                                                                                | Placebo                 | Age: 60.8 (0.72)<br>Males: 56% | 7.2 (0.05) | NR         | 90.9 (1.44) | 31.7 (0.41) | 5.5 (0.56)     |
| <b>Pan<br/>2012<br/>N=438</b>           | 24 | HbA <sub>1c</sub> : 7-10%<br>Stable therapy for ≥4 weeks<br>Metformin Dose: ≥1500 mg/d<br>BMI: 20-40 kg/m <sup>2</sup><br>FPG: <270 mg/dl                                                      | Vildagliptin 50 mg QD   | Age: 53.7 (0.82)<br>Males: 55% | 8.1 (0.07) | NR         | 68.4 (0.91) | 25.0 (0.25) | 5.0 (0.36)     |
|                                         |    |                                                                                                                                                                                                | Vildagliptin 50 mg BID  | Age: 54.2 (0.80)<br>Males: 50% | 8.1 (0.07) | NR         | 71.6 (0.99) | 26.0 (0.27) | 4.9 (0.40)     |
|                                         |    |                                                                                                                                                                                                | Placebo                 | Age: 54.5 (0.81)<br>Males: 56% | 8.0 (0.07) | NR         | 69.8 (0.93) | 25.5 (0.26) | 5.2 (0.38)     |
| <b>Rizzo<br/>2012<br/>N=90</b>          | 12 | HbA <sub>1c</sub> : >7.5%<br>Stable therapy for ≥8 weeks<br>Metformin Dose: ≥2000 mg/d                                                                                                         | Sitagliptin 100 mg QD   | Age: 60 (1.27)<br>Males: 44%   | 8.5 (0.16) | 129 (2.24) | NR          | 30 (0.85)   | 8.6 (0.33)     |
|                                         |    |                                                                                                                                                                                                | Vildagliptin 50 mg BID  | Age: 60 (1.31)<br>Males: 51%   | 8.2 (0.10) | 132 (1.94) | NR          | 29.7 (0.76) | 8.9 (0.28)     |
| <b>Rosenstock<br/>2012<br/>N=451</b>    | 12 | HbA <sub>1c</sub> : 7-10.5%<br>Stable therapy for ≥12 weeks<br>Metformin Dose: ≥1500 mg/d<br>BMI: 25-45 kg/m <sup>2</sup> (or 24-45<br>kg/m <sup>2</sup> for Asian patients)<br>Weight: Stable | Placebo                 | Age: 53.3 (0.97)<br>Males: 48% | 7.8 (0.10) | 125 (1.24) | 85.9 (2.42) | 30.6 (0.57) | 6.4 (0.62)     |
|                                         |    |                                                                                                                                                                                                | Canagliflozin 100 mg QD | Age: 51.7 (1.00)<br>Males: 56% | 7.8 (0.12) | 127 (1.63) | 87.7 (1.94) | 31.7 (0.63) | 6.1 (0.59)     |
|                                         |    |                                                                                                                                                                                                | Canagliflozin 300 mg QD | Age: 52.3(0.86)<br>Males: 56%  | 7.7 (0.13) | 126 (1.50) | 87.3 (1.99) | 31.6 (0.61) | 5.9 (0.65)     |
|                                         |    |                                                                                                                                                                                                | Sitagliptin 100 mg QD   | Age: 51.7 (1.00)<br>Males: 59% | 7.6 (0.12) | 129 (1.61) | 87.2 (2.23) | 31.6 (0.62) | 5.6 (0.58)     |
| <b>Ross<br/>2012<br/>N=491</b>          | 12 | HbA <sub>1c</sub> : 7-10%<br>Stable therapy for ≥12 weeks<br>Metformin Dose: ≥1500 mg/d<br>(or maximum tolerated dose)<br>BMI: ≤45 kg/m <sup>2</sup>                                           | Linagliptin 2.5 mg BID  | Age: 58.7 (0.66)<br>Males: 62% | 8.0 (0.05) | NR         | 82.2 (1.15) | 29.8 (0.35) | 52.3% >5 years |
|                                         |    |                                                                                                                                                                                                | Linagliptin 5 mg QD     | Age: 58.4 (0.71)<br>Males: 54% | 8.0 (0.05) | NR         | 80.6 (1.17) | 29.6 (0.33) | 52.0% >5 years |
|                                         |    |                                                                                                                                                                                                | Placebo                 | Age: 59.9 (1.61)<br>Males: 48% | 7.9 (0.11) | NR         | 77.7 (2.92) | 28.7 (0.83) | 55.8% >5 years |
| <b>Arechavaleta<br/>2011<br/>N=1035</b> | 30 | HbA <sub>1c</sub> : 6.5-9%<br>Stable therapy for ≥12 weeks<br>Metformin Dose: ≥1500 mg/d                                                                                                       | Sitagliptin 100 mg QD   | Age: 56.3 (0.43)<br>Males: 55% | 7.5 (0.03) | NR         | 80.6 (0.67) | 29.7 (0.20) | 6.8 (0.20)     |
|                                         |    |                                                                                                                                                                                                | Glimeperide 1 – 6 mg QD | Age: 56.2 (0.44)<br>Males: 54% | 7.5 (0.04) | NR         | 82.0 (0.73) | 30.2 (0.19) | 6.7 (0.21)     |

|                                    |    |                                                                                                                                                                                                                      |                               |                                  |            |              |             |             |              |
|------------------------------------|----|----------------------------------------------------------------------------------------------------------------------------------------------------------------------------------------------------------------------|-------------------------------|----------------------------------|------------|--------------|-------------|-------------|--------------|
| <b>Nauck<br/>2011<br/>N=801</b>    | 52 | HbA1c: 6.5-10%<br>Therapy with mono- or dual<br>OAD ≥8 weeks<br>Metformin Dose: ≥1500 mg/d<br>If taking <1500 mg/d then<br>entered an 8week dose<br>stabilization period with<br>1500-2000 mg/d<br>FPG < 270.3 mg/dl | Dapagliflozin 2.5-10 mg<br>QD | Age: 58 (0.45)<br>Males: 55%     | 7.7 (0.05) | 132.8 (NR)   | 96.4 (NR)   | 31.7 (0.26) | 6 (0.25)     |
|                                    |    |                                                                                                                                                                                                                      | Glipizide 5-20 mg QD          | Age: 59 (0.50)<br>Males: 55%     | 7.7 (0.05) | 133.8 (NR)   | 96.5 (NR)   | 31.2 (0.25) | 7 (0.30)     |
| <b>Pfützner<br/>2011<br/>N=288</b> | 24 | HbA1c: ≥6.5-9%<br>Stable therapy for ≥12 weeks<br>Metformin Dose: Maximally<br>tolerated dose (850-2000 mg)                                                                                                          | Pioglitazone 15 mg BID        | Age: 59 (0.83)<br>Males: 66%     | 7.1 (0.05) | 138 (1.24)   | 96.2 (1.45) | 32.6 (0.41) | 6.2 (0.45)   |
|                                    |    |                                                                                                                                                                                                                      | Glimepiride 1 mg BID          | Age: 59 (0.84)<br>Males: 64%     | 7.4 (0.06) | 137 (1.09)   | 94.1 (1.51) | 32.5 (0.44) | 5.9 (0.40)   |
| <b>Taskinen<br/>2011<br/>N=700</b> | 24 | HbA1c: 7-10%<br>Stable therapy for ≥12 weeks<br>Metformin Dose: ≥1500 mg/d<br>(or maximum tolerated dose)<br>BMI ≤40 kg/m <sup>2</sup>                                                                               | Placebo                       | Age: 56.6 (0.82)<br>Males: 57%   | 8.0 (0.07) | NR           | 83.3 (1.25) | 30.1 (0.38) | 53% >5 years |
|                                    |    |                                                                                                                                                                                                                      | Linagliptin 5 mg QD           | Age: 56.5 (0.44)<br>Males: 53%   | 8.1 (0.04) | NR           | 82.2 (0.75) | 29.9 (0.21) | 56% >5 years |
| <b>Wang<br/>2011<br/>N=55</b>      | 16 | HbA1c: 7-11%;<br>Therapy with mono- or dual<br>OAD ≥12 weeks<br>Metformin Dose: 1500 mg/d<br>8week monotherapy<br>stabilization period                                                                               | Acarbose 100 mg TID           | Age: 52.8 (1.55)<br>Males: 53.6% | 8.2 (0.15) | 129 (3.21)   | 69.8 (1.87) | 25.9 (0.57) | 7.6 (NR)     |
|                                    |    |                                                                                                                                                                                                                      | Glibenclamide 5 mg TID        | Age: 54.7 (1.73)<br>Males: 44%   | 8.6 (0.33) | 128 (3.34)   | 66.0 (3.21) | 25.3 (0.79) | 6.0 (NR)     |
| <b>Yang<br/>2011<br/>N=570</b>     | 24 | HbA1c: 7-10%<br>Stable therapy for ≥8 weeks<br>Metformin Dose: ≥1500 mg/d                                                                                                                                            | Saxagliptin 5 mg QD           | Age: 53.8 (0.62)<br>Males: 48%   | 7.9 (0.05) | NR           | 68.9 (0.74) | 26.3 (0.21) | 5.1 (0.30)   |
|                                    |    |                                                                                                                                                                                                                      | Placebo                       | Age: 54.4 (0.60)<br>Males: 48%   | 7.9 (0.05) | NR           | 69.0 (0.70) | 26.1 (0.21) | 5.1 (0.24)   |
| <b>Bailey<br/>2010<br/>N=546</b>   | 24 | HbA1c: 7-10%<br>Stable therapy for ≥8 weeks<br>Metformin Dose: ≥1500 mg/d<br>BMI: ≤45 kg/m <sup>2</sup>                                                                                                              | Placebo                       | Age: 53.7 (0.88)<br>Males: 55%   | 8.1 (0.08) | 127.7 (1.25) | 87.7 (1.64) | 31.8 (0.45) | 5.8 (0.44)   |
|                                    |    |                                                                                                                                                                                                                      | Dapagliflozin 5 mg            | Age: 54.3 (0.80)<br>Males: 50%   | 8.2 (0.08) | 126.9 (1.22) | 84.7 (1.39) | 31.4 (0.43) | 6.4 (0.50)   |
|                                    |    |                                                                                                                                                                                                                      | Dapagliflozin 10 mg QD        | Age: 52.7 (0.85)<br>Males: 57%   | 7.9 (0.07) | 126.0 (1.37) | 86.3 (1.50) | 31.2 (0.44) | 6.1 (0.46)   |
| <b>Filozof<br/>2010<br/>N=1007</b> | 52 | HbA1c: 7.5-11%<br>Stable therapy for ≥4 weeks<br>Metformin Dose: ≥1500 mg/d                                                                                                                                          | Vildagliptin 50 mg BID        | Age: 59.2 (0.44)<br>Males: 52%   | 8.5 (0.04) | NR           | 85.7 (0.73) | 31.2 (0.22) | 6.4 (0.23)   |
|                                    |    |                                                                                                                                                                                                                      | Gliclazide 80-320 mg QD       | Age: 59.7 (0.46)<br>Males: 52%   | 8.5 (0.04) | NR           | 84.2 (0.81) | 30.8 (0.22) | 6.8 (0.24)   |
| <b>Goke<br/>2010<br/>N=858</b>     | 52 | HbA1c: 6.5-10%<br>Stable therapy for ≥8 weeks<br>Metformin Dose: ≥1500 mg/d                                                                                                                                          | Saxagliptin 5 mg QD           | Age: 57.5 (0.50)<br>Males: 50%   | 7.7 (0.04) | NR           | 88.7 (0.90) | 31.5 (0.28) | 5.5 (0.22)   |
|                                    |    |                                                                                                                                                                                                                      | Glipizide 5-20 mg QD          | Age: 57.6 (0.50)<br>Males: 54%   | 7.7 (0.04) | NR           | 88.6 (0.95) | 31.3 (0.30) | 5.4 (0.23)   |
| <b>Pratley<br/>2010<br/>N=665</b>  | 26 | HbA1c: 7.5-10%<br>Stable therapy for ≥12 weeks<br>Metformin Dose: ≥1500 mg/d<br>BMI: ≤45 kg/m <sup>2</sup>                                                                                                           | Liraglutide 1.2 mg QD         | Age: 55.9 (0.6)<br>Males: 52%    | 8.4 (0.05) | 131.2 (0.96) | 93.7 (1.23) | 32.6 (0.35) | 6.0 (0.30)   |
|                                    |    |                                                                                                                                                                                                                      | Liraglutide 1.8 mg QD         | Age: 55.0 (0.6)<br>Males: 52%    | 8.4 (0.05) | 133.4 (0.98) | 94.6 (1.22) | 33.1 (0.34) | 6.4 (0.36)   |
|                                    |    |                                                                                                                                                                                                                      | Sitagliptin 100 mg QD         | Age: 55.0 (0.6)<br>Males: 55%    | 8.5 (0.05) | 132.1 (1.00) | 93.1 (1.28) | 32.6 (0.36) | 6.3 (0.36)   |

|                                       |    |                                                                                                                                                                           |                          |                                |            |              |             |             |            |
|---------------------------------------|----|---------------------------------------------------------------------------------------------------------------------------------------------------------------------------|--------------------------|--------------------------------|------------|--------------|-------------|-------------|------------|
| <b>Rigby<br/>2010<br/>N=169</b>       | 16 | HbA1c: 7-10%<br>Stable therapy for ≥12 weeks<br>Metformin Dose: 1500-2550 mg/d<br>BMI: ≤40 kg/m <sup>2</sup>                                                              | Colesvelam 3.75 g QD     | Age: 56.6 (1.22)<br>Males: 49% | 8.1 (0.10) | NR           | 78.7 (2.45) | NR          | 8.1 (0.79) |
|                                       |    |                                                                                                                                                                           | Rosiglitazone 4 mg QD    | Age: 54.7 (1.46)<br>Males: 41% | 8.1 (0.10) | NR           | 81.1 (2.39) | NR          | 7.6 (0.80) |
|                                       |    |                                                                                                                                                                           | Sitagliptin 100 mg QD    | Age: 54.8 (1.31)<br>Males: 36% | 8.2 (0.12) | NR           | 79.6 (2.42) | NR          | 8.4 (0.94) |
| <b>Scheen<br/>2010<br/>N=801</b>      | 18 | HbA1c: 6.5-10%<br>Stable therapy for ≥8 weeks<br>Metformin Dose: ≥1500 mg/d                                                                                               | Saxagliptin 5 mg QD      | Age: 58.8 (0.50)<br>Males: 47% | 7.7 (0.05) | NR           | NR          | 31.1 (0.26) | 6.3 (0.25) |
|                                       |    |                                                                                                                                                                           | Sitagliptin 100 mg QD    | Age: 58.1 (0.53)<br>Males: 51% | 7.7 (0.05) | NR           | NR          | 30.9 (0.28) | 6.3 (0.24) |
| <b>DeFronzo<br/>2009<br/>N=743</b>    | 24 | HbA1c: 7-10%<br>Stable therapy for ≥8 weeks<br>Metformin Dose: 1500-2550 mg/d<br>BMI: ≤40 kg/m <sup>2</sup>                                                               | Placebo                  | Age: 54.8 (0.76)<br>Males: 54% | 8.1 (0.07) | NR           | 87.1 (1.33) | 31.6 (0.36) | 6.7 (0.42) |
|                                       |    |                                                                                                                                                                           | Saxagliptin 2.5 mg QD    | Age: 54.7 (0.73)<br>Males: 43% | 8.1 (0.07) | NR           | 86.0 (1.27) | 31.7 (0.38) | 6.7 (0.40) |
|                                       |    |                                                                                                                                                                           | Saxagliptin 5 mg QD      | Age: 54.7 (0.69)<br>Males: 54% | 8.1 (0.06) | NR           | 87.3 (1.23) | 31.2 (0.34) | 6.4 (0.34) |
| <b>Ferrannini<br/>2009<br/>N=2789</b> | 52 | HbA1c: 6.5-8.5%<br>Stable therapy for ≥4 weeks<br>Metformin Dose: ≥1500 mg/d<br>BMI: 22-45 kg/m <sup>2</sup>                                                              | Vildagliptin 50mg BID    | Age: 57.5 (0.24)<br>Males: 53% | 7.3 (0.02) | NR           | 89.0 (NR)   | 31.8 (0.14) | 5.7 (0.14) |
|                                       |    |                                                                                                                                                                           | Glimeperide 2 to 6 mg QD | Age: 57.5 (0.25)<br>Males: 54% | 7.3 (0.02) | NR           | 88.6 (NR)   | 31.7 (0.14) | 5.8 (0.13) |
| <b>Goodman<br/>2009<br/>N=370</b>     | 24 | HbA1c: 7.5-11%<br>Stable therapy for ≥12 weeks<br>Metformin Dose: ≥1500 mg<br>BMI: 22-40 kg/m <sup>2</sup><br>FPG: <270 mg/dl                                             | Vildagliptin 100 mg QD   | Age: 54.9 (0.69)<br>Males: 53% | 8.5 (0.06) | NR           | NR          | 31.4 (0.30) | NR         |
|                                       |    |                                                                                                                                                                           | Placebo                  | Age: 54.5 (0.88)<br>Males: 67% | 8.7 (0.10) | NR           | NR          | 31.7 (0.39) | NR         |
| <b>Nauck<br/>2009<br/>N=527</b>       | 26 | HbA1c: 7-10%<br>Stable therapy for ≥12 weeks<br>Metformin Dose: ≥1500 mg/d<br>BMI: 23-45 kg/m <sup>2</sup><br>FPG: <275 mg/dl                                             | Placebo                  | Age: 56 (1.08)<br>Males: 48%   | 8.0 (0.09) | 129 (1.67)   | NR          | 32 (0.59)   | 6 (0.49)   |
|                                       |    |                                                                                                                                                                           | Alogliptin 12.5 mg QD    | Age: 55 (0.75)<br>Males: 47%   | 7.9 (0.05) | 127 (0.89)   | NR          | 32 (0.34)   | 6 (0.34)   |
|                                       |    |                                                                                                                                                                           | Alogliptin 25 mg QD      | Age: 54 (0.76)<br>Males: 54%   | 7.9 (0.06) | 127.3 (1.03) | NR          | 32 (0.35)   | 6 (0.28)   |
| <b>Nauck<br/>2009<br/>N=1087</b>      | 26 | HbA1c: 7-11%<br>Therapy with mono- or dual<br>OAD ≥12 weeks<br>3 week metformin titration to<br>2 g/d then a 3 week stabilization<br>period<br>BMI: ≤40 kg/m <sup>2</sup> | Liraglutide 0.6 mg QD    | Age: 56 (0.71)<br>Males: 62%   | 8.4 (0.06) | 131 (0.90)   | NR          | 30.5 (0.31) | 7 (0.32)   |
|                                       |    |                                                                                                                                                                           | Liraglutide 1.2 mg QD    | Age: 57 (0.58)<br>Males: 54%   | 8.3 (0.06) | 132 (0.90)   | NR          | 31.1 (0.31) | 7 (0.32)   |
|                                       |    |                                                                                                                                                                           | Liraglutide 1.8 mg QD    | Age: 57 (0.58)<br>Males: 59%   | 8.4 (0.06) | 131 (0.90)   | NR          | 30.9 (0.30) | 8 (0.32)   |
|                                       |    |                                                                                                                                                                           | Glimepiride 4 mg QD      | Age: 57 (0.58)<br>Males: 57%   | 8.4 (0.06) | 132 (1.03)   | NR          | 31.2 (0.30) | 8 (0.32)   |
|                                       |    |                                                                                                                                                                           | Placebo                  | Age: 56 (0.82)<br>Males: 60%   | 8.4 (0.10) | 135 (1.45)   | NR          | 31.6 (0.40) | 8 (0.55)   |

|                                    |    |                                                                                                                                                                                                                                                                                           |                                 |                                |            |    |             |             |            |
|------------------------------------|----|-------------------------------------------------------------------------------------------------------------------------------------------------------------------------------------------------------------------------------------------------------------------------------------------|---------------------------------|--------------------------------|------------|----|-------------|-------------|------------|
| <b>Hamann<br/>2008<br/>N=596</b>   | 52 | HbA1c: 7-10%<br>Stable therapy for ≥8 weeks<br>Metformin Dose: ≥850 mg/d<br>If taking ≥1.5 g/d entered a 4 week titration with 2 g/d.<br>If taking <1.5 g/d entered an additional 1 week titration with 1.5 g/d before entering 4 week titration with 2 g/d<br>BMI: ≥25 kg/m <sup>2</sup> | Rosiglitazone/metformin 4 mg QD | Age: 58.5 (0.56)<br>Males: 53% | 8.0 (0.05) | NR | 91.4 (1.00) | 33.0 (0.34) | 6.3 (0.31) |
|                                    |    |                                                                                                                                                                                                                                                                                           | Glibenclamide 5 mg QD           | Age: 59.3 (0.53)<br>Males: 52% | 8.0 (0.06) | NR | 88.9 (0.96) | 32.2 (0.28) | 6.4 (0.32) |
|                                    |    |                                                                                                                                                                                                                                                                                           | Gliclazide 80 mg QD             |                                |            |    |             |             |            |
| <b>Khanolkar<br/>2008<br/>N=50</b> | 24 | HbA1c: >6.5%<br>If <2 g/d metformin, entered 4week titration, when max tolerated dose was reached (up to 2 g/d) then entered a 4week stabilization                                                                                                                                        | Rosiglitazone 4 mg QD           | Age: 59 (NR)<br>Males: 56%     | 7.3 (0.10) | NR | NR          | 34.6 (1.77) | NR         |
|                                    |    |                                                                                                                                                                                                                                                                                           | Gliclazide 80 mg QD             | Age: 56 (NR)<br>Males: 60%     | 7.1 (0.14) | NR | NR          | 33.7 (1.64) | NR         |
| <b>Raz<br/>2008<br/>N=190</b>      | 30 | HbA1c: 8-11%<br>Therapy with mono- or dual OAD. OAD(s) switched to metformin 1500-2550 mg/d and entered a 6 week stabilization<br>FPG: 129.7-281.1 mg/dl                                                                                                                                  | Sitagliptin 100 mg QD           | Age: 53.6 (0.97)<br>Males: 51% | 9.3 (0.09) | NR | 81.5 (1.71) | 30.1 (0.45) | 8.4 (0.66) |
|                                    |    |                                                                                                                                                                                                                                                                                           | Placebo                         | Age: 56.1 (0.98)<br>Males: 42% | 9.1 (0.08) | NR | 81.2 (2.00) | 30.4 (0.55) | 7.3 (0.55) |
| <b>Scott<br/>2008<br/>N=273</b>    | 18 | HbA1c: 7-11%<br>Stable therapy for ≥10 weeks<br>Metformin Dose: ≥1500 mg/d<br>FPG: <270 mg/dl                                                                                                                                                                                             | Placebo                         | Age: 55.3 (0.97)<br>Males: 59% | 7.7 (0.09) | NR | 84.6 (1.72) | 30.0 (0.47) | 5.4 (0.39) |
|                                    |    |                                                                                                                                                                                                                                                                                           | Sitagliptin 100 mg QD           | Age: 55.2 (1.01)<br>Males: 55% | 7.8 (0.10) | NR | 83.1 (1.76) | 30.3 (0.48) | 4.9 (0.36) |
|                                    |    |                                                                                                                                                                                                                                                                                           | Rosiglitazone 8 mg QD           | Age: 54.8 (1.13)<br>Males: 63% | 7.7 (0.09) | NR | 84.9 (1.98) | 30.4 (0.59) | 4.6 (0.43) |
| <b>Bosi<br/>2007<br/>N=544</b>     | 24 | HbA1c: 7.5-11%<br>Stable therapy for ≥4 weeks<br>Metformin Dose: ≥1500 mg/d<br>If tolerated, increased to 2 g/d at visit 1<br>BMI: 22-45 kg/m <sup>2</sup><br>FPG: < 270.3 mg/dl                                                                                                          | Vildagliptin 50 mg QD           | Age: 54.3 (0.73)<br>Males: 57% | 8.4 (0.07) | NR | NR          | 32.1 (0.40) | 6.8 (0.41) |
|                                    |    |                                                                                                                                                                                                                                                                                           | Vildagliptin 100 mg QD          | Age: 53.9 (0.70)<br>Males: 62% | 8.4 (0.07) | NR | NR          | 32.9 (0.37) | 5.8 (0.35) |
|                                    |    |                                                                                                                                                                                                                                                                                           | Placebo                         | Age: 54.5 (0.76)<br>Males: 53% | 8.3 (0.07) | NR | NR          | 33.2 (0.45) | 6.2 (0.39) |
| <b>Nauck<br/>2007<br/>N=1172</b>   | 52 | HbA1c: 6.5-10%<br>Metformin Dose: ≥1.5 g/d<br>If not on a OAD, or on dual-OAD then entered a metformin monotherapy titration and stabilization for 8weeks                                                                                                                                 | Sitagliptin 100 mg QD           | Age: 56.8 (0.38)<br>Males: 57% | 7.7 (0.04) | NR | 89.5 (0.72) | 31.2 (0.21) | 6.5 (0.25) |
|                                    |    |                                                                                                                                                                                                                                                                                           | Glipizide 5 – 20 mg QD          | Age: 56.9 (0.41)<br>Males: 61% | 7.6 (0.04) | NR | 89.7 (0.72) | 31.3 (0.22) | 6.2 (0.22) |
| <b>Ristic<br/>2006<br/>N=262</b>   | 24 | HbA1c: 6.8-9%<br>Stable therapy for ≥8 weeks<br>Metformin Dose: ≥1000 mg/d (or maximum tolerated dose)<br>BMI: 20-35 kg/m <sup>2</sup>                                                                                                                                                    | Nateglinide 60 – 180 mg TID     | Age: 62.0 (0.95)<br>Males: 54% | 7.7 (0.05) | NR | NR          | 28.5 (0.30) | 7.2 (0.55) |
|                                    |    |                                                                                                                                                                                                                                                                                           | Gliclazide 80 – 240 mg QD       | Age: 61.6 (0.89)<br>Males: 50% | 7.6 (0.05) | NR | NR          | 29.5 (0.32) | 6.7 (0.49) |

|                                            |    |                                                                                                                                                                                                     |                               |                                |            |            |             |             |                       |
|--------------------------------------------|----|-----------------------------------------------------------------------------------------------------------------------------------------------------------------------------------------------------|-------------------------------|--------------------------------|------------|------------|-------------|-------------|-----------------------|
| <b>DeFronzo<br/>2005<br/>N=336</b>         | 30 | HbA1c: 7.1-11%<br>Stable therapy for ≥12 weeks<br>Metformin Dose: ≥1500 mg/d<br>BMI: 27-45 kg/m <sup>2</sup><br>FPG: <240 mg/dl<br>Weight: Stable (<10% variance)<br>for ≥12 weeks before screening | Placebo                       | Age: 54 (0.84)<br>Males: 59%   | 8.2 (0.09) | NR         | 100 (1.79)  | 34 (0.56)   | 6.6 (0.57)            |
|                                            |    |                                                                                                                                                                                                     | Exenatide 5 ug BID            | Age: 53 (1.05)<br>Males: 52%   | 8.3 (0.10) | NR         | 100 (2.10)  | 34 (0.57)   | 6.2 (0.56)            |
|                                            |    |                                                                                                                                                                                                     | Exenatide 10 ug BID           | Age: 52 (1.03)<br>Males: 60%   | 8.2 (0.09) | NR         | 101 (1.88)  | 34 (0.56)   | 4.9 (0.44)            |
| <b>Feinglos<br/>2005<br/>N=122</b>         | 16 | HbA1c: 7-8.5%<br>Stable therapy for ≥12 weeks<br>Metformin Dose: ≥1 g/d<br>BMI: 27-38 kg/m <sup>2</sup>                                                                                             | Glipizide 2.5 mg QD           | Age: 57.7 (1.37)<br>Males: 46% | 7.5 (NR)   | NR         | 90.0 (2.39) | 31.7 (0.56) | 6.5 (NR)              |
|                                            |    |                                                                                                                                                                                                     | Placebo                       | Age: 58.8 (1.28)<br>Males: 41% | 7.6 (NR)   | NR         | 90.8 (2.36) | 32.1 (0.63) | 4.6 (NR)              |
| <b>Matthews<br/>2005<br/>N=630</b>         | 52 | HbA1c: 7.5-11%<br>Stable therapy for ≥12 weeks<br>Metformin Dose: ≥50%<br>maximum recommended dose<br>or maximum tolerated dose                                                                     | Pioglitazone 15 – 45 mg<br>QD | Age: 56 (0.52)<br>Males: 51%   | 8.7 (0.06) | NR         | 91.8 (0.91) | 32.6 (0.28) | 5.8 (0.29)            |
|                                            |    |                                                                                                                                                                                                     | Glucicazide 80 – 320 mg<br>QD | Age: 57 (0.51)<br>Males: 49%   | 8.5 (0.05) | NR         | 92.7 (0.98) | 32.6 (0.33) | 5.5 (0.29)            |
| <b>Ahren<br/>2004<br/>N=71</b>             | 12 | HbA1c: 7-9.5%<br>Stable therapy for ≥12 weeks<br>Metformin Dose: 1.5-3 g/d<br>BMI: 20-35 kg/m <sup>2</sup>                                                                                          | Vildagliptin 50 mg QD         | Age: 58.4 (1.42)<br>Males: 62% | 7.6 (0.09) | NR         | NR          | 29.6 (0.57) | 5.8 (0.65)            |
|                                            |    |                                                                                                                                                                                                     | Placebo                       | Age: 54.3 (2.27)<br>Males: 76% | 7.8 (0.11) | NR         | NR          | 29.9 (0.67) | 4.6 (0.67)            |
| <b>Gomez-<br/>Perez<br/>2002<br/>N=116</b> | 26 | FPG: 140-300 mg/dl<br>3-6 week titration with 2.5 g/d<br>then 4 week stabilization period                                                                                                           | Placebo                       | Age: 53.4 (1.29)<br>Males: 29% | NR         | NR         | NR          | 28.5 (0.67) | 9.1 (0.96)            |
|                                            |    |                                                                                                                                                                                                     | Rosiglitazone 2 mg QD         | Age: 51.7 (1.45)<br>Males: 29% | NR         | NR         | NR          | 28.0 (0.68) | 11.1 (1.20)           |
|                                            |    |                                                                                                                                                                                                     | Rosiglitazone 4 mg QD         | Age: 54.2 (1.55)<br>Males: 19% | NR         | NR         | NR          | 27.6 (0.53) | 10.7 (1.17)           |
| <b>Marre<br/>2002<br/>N=467</b>            | 24 | HbA1c: 6.8-11%<br>Stable therapy for ≥4 weeks<br>Metformin Dose: ≥1500 mg/d<br>4 week 2 g/d stabilization period<br>BMI: 20-35 kg/m <sup>2</sup>                                                    | Nateglinide 60 mg TID         | Age: 57.9 (0.80)<br>Males: 61% | 8.0 (NR)   | NR         | 84.8 (1.1)  | 29.4 (0.30) | 7.2 (0.51)            |
|                                            |    |                                                                                                                                                                                                     | Nateglinide 120 mg TID        | Age: 57.3 (0.83)<br>Males: 61% | 8.2 (NR)   | NR         | 85.2 (1.1)  | 29.3 (0.28) | 6.8 (0.43)            |
|                                            |    |                                                                                                                                                                                                     | Placebo                       | Age: 56.4 (0.84)<br>Males: 55% | 8.3 (NR)   | NR         | 84.9 (1.2)  | 29.6 (0.32) | 6.5 (0.53)            |
| <b>Charpentier<br/>2001<br/>N=372</b>      | 20 | Stable therapy for ≥4 weeks<br>Metformin Dose: 2550 mg/d<br>FPG: 7.8-13.9 mmol/l<br>BMI: 23-40 kg/m <sup>2</sup>                                                                                    | Placebo                       | Age: 56.7 (NR)<br>Males: 60%   | 6.8 (0.14) | 142 (1.27) | 82.2 (NR)   | 29.2 (NR)   | 7.0 (NR)              |
|                                            |    |                                                                                                                                                                                                     | Glimepiride 1 – 6 mg QD       | Age: 56.8 (NR)<br>Males: 59%   | 6.4 (0.09) | 140 (0.99) | 81.2 (NR)   | 29.5 (NR)   | 5.6 (NR)              |
| <b>Van Gaal<br/>2001<br/>N=152</b>         | 32 | HbA1c: 7.5-10.5%<br>Stable therapy for ≥12 weeks<br>Metformin Dose: 1500-2550<br>mg/d<br>BMI: 23-40 kg/m <sup>2</sup><br>Weight: Stable (<5% variance)<br>for ≥12 weeks before enrollment           | Migliitol 100 mg TID          | Age: 57.9 (1.14)<br>Males: 42% | 8.5 (0.11) | NR         | NR          | 30.0 (0.46) | 6 (1.32) <sup>c</sup> |
|                                            |    |                                                                                                                                                                                                     | Placebo                       | Age: 57.9 (0.98)<br>Males: 49% | 8.4 (0.12) | NR         | NR          | 29.7 (0.45) | 6 (0.22) <sup>c</sup> |



|                                      |    |                                                                                                                                                                                                                                                |                        |                                |            |    |           |             |            |
|--------------------------------------|----|------------------------------------------------------------------------------------------------------------------------------------------------------------------------------------------------------------------------------------------------|------------------------|--------------------------------|------------|----|-----------|-------------|------------|
| <b>Halimi<br/>2000<br/>N=129</b>     | 24 | HbA1c: 7-11%<br>Stable therapy for ≥8 weeks<br>Metformin Dose: 1500-2550<br>mg/d<br>BMI: 25-35 kg/m <sup>2</sup>                                                                                                                               | Acarbose 50-100 mg TID | Age: 56 (1.20)<br>Males: 48%   | 8.6 (0.14) | NR | NR        | 30.1 (0.43) | 9.5 (0.97) |
|                                      |    |                                                                                                                                                                                                                                                | Placebo                | Age: 55 (1.20)<br>Males: 63%   | 8.5 (0.13) | NR | NR        | 29.7 (0.39) | 9.0 (0.90) |
| <b>Fonseca<br/>2000<br/>N=348</b>    | 26 | Metformin Dose: ≥2.5 g/d<br>If <2.5 g/d, entered a 3 week<br>titration to 2.5 g/d then 4 week<br>stabilization period<br>BMI 22-38 kg/m <sup>2</sup><br>Weight: Stable (<10% variance)<br>between screening and baseline<br>FPG: 140-300 mg/dl | Placebo                | Age: 58.8 (0.87)<br>Males: 74% | 8.6 (0.12) | NR | NR        | 30.3 (0.41) | 7.3 (0.54) |
|                                      |    |                                                                                                                                                                                                                                                | Rosiglitazone 4 mg QD  | Age: 57.5 (0.97)<br>Males: 62% | 8.9 (0.12) | NR | NR        | 30.2 (0.39) | 7.5 (0.58) |
|                                      |    |                                                                                                                                                                                                                                                | Rosiglitazone 8 mg QD  | Age: 58.3 (0.84)<br>Males: 68% | 8.9 (0.14) | NR | NR        | 29.8 (0.37) | 8.3 (0.60) |
| <b>Moses<br/>1999<br/>N=83</b>       | 12 | HbA1c: >7.1%<br>Stable therapy: ≥6 months<br>Metformin Dose: 1-3 g/d<br>BMI: ≥21 kg/m <sup>2</sup>                                                                                                                                             | Repaglinide 4 mg QD    | Age: 57.2 (1.60)<br>Males: 67% | 8.3 (0.17) | NR | NR        | 33.2 (1.08) | 5.9 (0.56) |
|                                      |    |                                                                                                                                                                                                                                                | Placebo                | Age: 57.8 (1.83)<br>Males: 63% | 8.6 (0.21) | NR | NR        | 31.8 (1.15) | 8.0 (1.19) |
| <b>Rosenstock<br/>1998<br/>N=148</b> | 24 | HbA1c: 7-10%<br>Stable therapy for ≥8 weeks<br>Metformin Dose: 2 or 2.5 g/d<br>Weight: Stable (< 3 kg) for ≥4<br>weeks before screening                                                                                                        | Acarbose 50-100 mg TID | Age: 57.2 (NR)<br>Males: 61%   | 8.5 (NR)   | NR | 94.4 (NR) | 32.4 (NR)   | 7.2 (NR)   |
|                                      |    |                                                                                                                                                                                                                                                | Placebo                | Age: 55.9 (NR)<br>Males: 49%   | 8.2 (NR)   | NR | 91.5 (NR) | 32.3 (NR)   | 7.8 (NR)   |
