# Supplementary material for: Comparative Efficacy and Safety of Antidiabetic Drug Regimens Added to Metformin Monotherapy in Patients with Type 2 Diabetes: A Network Meta-Analysis
Source: PubMed Central journal article supplement (PMC4412636; doi:10.1371/journal.pone.0125879), 2015-04-28
Supplement: pone.0125879.s019.pdf [file pone.0125879.s019.pdf]

**Table S2. Results of Traditional Meta-Analysis Comparing Antidiabetic Therapies Effect on HbA1c**

| Comparison         | No. of Trials | Change in HbA1c, %<br>WMD (95%CI) |
|--------------------|---------------|-----------------------------------|
| ACA vs. PLC        | 2             | -0.78 (-1.06, -0.50)              |
| ALO vs. PLC        | 2             | -0.60 (-0.76, -0.43)              |
| ALO/PIO vs. PLC    | 1             | -1.29 (-1.49, -1.09)              |
| CANA vs. PLC       | 2             | -0.67 (-0.79, -0.55)              |
| DAPA vs. PLC       | 2             | -0.43 (-0.55, -0.31)              |
| EMPA vs. PLC       | 2             | -0.64 (-0.75, -0.52)              |
| EXEN vs. PLC       | 2             | -0.79 (-0.86, -0.72)              |
| GLIM vs. PLC       | 2             | -0.95 (-1.23, -0.67)              |
| GLIP vs. PLC       | 1             | -0.47 (-0.74, -0.20)              |
| LINA vs. PLC       | 2             | -0.68 (-0.81, -0.54)              |
| LIRA vs. PLC       | 1             | -1.00 (-1.26, -0.75)              |
| LIX vs. PLC        | 1             | -0.45 (-0.69, -0.22)              |
| MIG vs. PLC        | 1             | -0.43 (-0.70, -0.16)              |
| NAT vs. PLC        | 1             | -0.44 (-0.60, -0.28)              |
| PIO vs. PLC        | 1             | -0.76 (-0.98, -0.54)              |
| REP vs. PLC        | 1             | -1.08 (-1.73, -0.43)              |
| ROSI vs. PLC       | 3             | -0.91 (-1.38, -0.44) <sup>a</sup> |
| SAXA vs. PLC       | 3             | -0.50 (-0.74, -0.26) <sup>a</sup> |
| SITA vs. PLC       | 8             | -0.67 (-0.73, -0.60)              |
| VILDA vs. PLC      | 5             | -0.63 (-0.83, -0.43) <sup>a</sup> |
| ACA vs. GLIB       | 1             | 0.50 (-0.13, 1.13)                |
| ALO vs. ALO/PIO    | 1             | 0.65 (0.49, 0.81)                 |
| ALO vs. PIO        | 1             | 0.12 (-0.06, 0.30)                |
| CANA vs. GLIM      | 1             | -0.06 (-0.16, 0.04)               |
| CANA vs. SITA      | 2             | -0.05 (-0.14, 0.04)               |
| COL vs. ROSI       | 1             | 0.30 (-0.05, 0.65)                |
| COL vs. SITA       | 1             | 0.10 (-0.25, 0.45)                |
| DAPA vs. GLIP      | 1             | 0.00 (-0.12, 0.12)                |
| EMPA vs. GLIM      | 1             | -0.07 (-0.15, 0.01)               |
| EMPA vs. LINA      | 1             | 0.06 (-0.08, 0.20)                |
| EMPA vs. SITA      | 1             | -0.11 (-0.33, 0.11)               |
| EMPA/LINA vs. EMPA | 1             | -0.49 (-0.61, -0.37)              |
| EMPA/LINA vs. LINA | 1             | -0.43 (-0.57, -0.29)              |
| EXEN vs. GLIM      | 1             | -0.18 (-0.30, -0.06)              |
| LINA vs. GLIM      | 1             | 0.21 (0.13, 0.29)                 |
| LIRA vs. GLIM      | 1             | 0.10 (-0.10, 0.30)                |
| LIRA vs. SITA      | 2             | -0.28 (-0.64, 0.08)               |
| LIX vs. EXEN       | 1             | 0.17 (0.03, 0.31)                 |
| NAT vs. GLIC       | 1             | 0.16 (-0.06, 0.38)                |
| PIO vs. ALO/PIO    | 1             | 0.53 (0.39, 0.67)                 |
| PIO vs. GLIC       | 1             | 0.02 (-0.16, 0.20)                |
| PIO vs. GLIM       | 1             | 0.12 (-0.08, 0.32)                |
| ROSI vs. GLIC      | 2             | -0.01 (-0.27, 0.24)               |
| SAX vs. GLIP       | 1             | 0.08 (-0.06, 0.18)                |
| SAX vs. SITA       | 1             | 0.10 (-0.02, 0.22)                |
| SITA vs. GLARG     | 1             | 0.59 (0.41, 0.77)                 |
| SITA vs. GLIM      | 1             | 0.07 (-0.05, 0.19)                |
| SITA vs. GLIP      | 1             | 0.00 (-0.12, 0.12)                |
| SITA vs. PIO       | 1             | 0.09 (-0.07, 0.25)                |
| SITA vs. ROSI      | 2             | 0.09 (-0.08, 0.26)                |
| SITA vs. VILDA     | 1             | -0.20 (-0.53, 0.13)               |
| VILDA vs. GLIC     | 1             | 0.04 (-0.12, 0.20)                |
| VILDA vs. GLIM     | 2             | 0.08 (0.03, 0.14)                 |
