# Supplementary material for: Comparative Efficacy and Safety of Antidiabetic Drug Regimens Added to Metformin Monotherapy in Patients with Type 2 Diabetes: A Network Meta-Analysis
Source: PubMed Central journal article supplement (PMC4412636; doi:10.1371/journal.pone.0125879), 2015-04-28
Supplement: pone.0125879.s020.pdf [file pone.0125879.s020.pdf]

**Table S3. Results of Traditional Meta-Analysis Comparing Antidiabetic Therapies Effect on Body Weight**

| Comparison         | No. of Trials | Change in Weight, kg<br>WMD (95%CI) |
|--------------------|---------------|-------------------------------------|
| ACA vs. PLC        | 1             | -0.10 (-0.92, 0.72)                 |
| ALO vs. PLC        | 2             | 0.05 (-0.41, 0.51)                  |
| ALO/PIO vs. PLC    | 1             | 2.50 (1.74, 3.26)                   |
| CANA vs. PLC       | 2             | -2.10 (-2.65, -1.55)                |
| DAPA vs. PLC       | 2             | -2.10 (-2.62, -1.59)                |
| EMPA vs. PLC       | 2             | -1.74 (-2.10, -1.37)                |
| EXEN vs. PLC       | 2             | -2.76 (-4.85, -0.67)                |
| GLIM vs. PLC       | 2             | 1.92 (0.78, 3.06)                   |
| GLIP vs. PLC       | 1             | 2.10 (0.85, 3.35)                   |
| LINA vs. PLC       | 1             | 0.40 (-0.50, 1.30)                  |
| LIRA vs. PLC       | 1             | -0.90 (-1.49, -0.31)                |
| LIX vs. PLC        | 1             | -1.02 (-1.96, -0.08)                |
| MIG vs. PLC        | 1             | -1.80 (-2.78, -0.82)                |
| NAT vs. PLC        | 1             | 0.60 (0.13, 1.07)                   |
| PIO vs. PLC        | 1             | 2.14 (1.32, 2.96)                   |
| REP vs. PLC        | 1             | 3.27 (1.88, 4.66)                   |
| ROSI vs. PLC       | 3             | 2.27 (1.84, 2.70)                   |
| SAXA vs. PLC       | 2             | -0.06 (-0.32, 0.20)                 |
| SITA vs. PLC       | 7             | 0.16 (-0.12, 0.45)                  |
| VILDA vs. PLC      | 4             | -0.16 (-1.02, 0.70) <sup>a</sup>    |
| ACA vs. GLIB       | 1             | -2.30 (-3.53, -1.07)                |
| ALO/PIO vs. ALO    | 1             | 2.19 (1.62, 2.76)                   |
| ALO/PIO vs. PIO    | 1             | 0.36 (-0.15, 0.87)                  |
| CANA vs. GLIM      | 1             | -4.55 (-5.02, -4.08)                |
| CANA vs. SITA      | 2             | -2.28 (-2.67, -1.89)                |
| COL vs. ROSI       | 1             | -0.90 (-2.04, 0.24)                 |
| COL vs. SITA       | 1             | 0.51 (-0.31, 1.33)                  |
| DAPA vs. GLIP      | 1             | -4.66 (-5.15, -4.17)                |
| EMPA vs. GLIM      | 1             | -4.80 (-5.07, -4.53)                |
| EMPA vs. LINA      | 1             | -2.15 (-2.88, -1.42)                |
| EMPA vs. SITA      | 1             | -1.85 (-2.61, -1.09)                |
| EMPA/LINA vs. EMPA | 1             | 0.05 (-0.54, 0.64)                  |
| EMPA/LINA vs. LINA | 1             | -2.10 (-2.83, -1.37)                |
| LINA vs. GLIM      | 1             | -2.50 (-2.87, -2.13)                |
| LIRA vs. GLIM      | 1             | -3.40 (-3.83, -2.97)                |
| LIRA vs. SITA      | 2             | -2.30 (-2.76, -1.85)                |
| LIX vs. EXEN       | 1             | 1.02 (0.37, 1.67)                   |
| PIO vs. ALO        | 1             | 1.83 (1.20, 2.46)                   |
| PIO vs. GLIM       | 1             | 0.00 (-1.00, 1.00)                  |
| ROSI vs. GLIC      | 1             | 1.10 (0.28, 1.92)                   |
| ROSI vs. SITA      | 2             | 1.81 (1.31, 2.30)                   |
| SAX vs. GLIP       | 1             | -2.20 (-2.69, -1.71)                |
| SITA vs. GLARG     | 1             | -1.52 (-2.11, -0.93)                |
| SITA vs. GLIM      | 1             | -2.00 (-2.41, -1.59)                |
| SITA vs. GLIP      | 1             | -2.60 (-3.38, -1.82)                |
| VILDA vs. GLIC     | 1             | -1.28 (-2.04, -0.52)                |
| VILDA vs. GLIM     | 2             | -1.81 (-2.12, -1.50)                |
