# Supplementary material for: Comparative Efficacy and Safety of Antidiabetic Drug Regimens Added to Metformin Monotherapy in Patients with Type 2 Diabetes: A Network Meta-Analysis
Source: PubMed Central journal article supplement (PMC4412636; doi:10.1371/journal.pone.0125879), 2015-04-28
Supplement: pone.0125879.s021.pdf [file pone.0125879.s021.pdf]

**Table S4. Results of Traditional Meta-Analysis Comparing Antidiabetic Therapies Effect on Systolic Blood Pressure**

| Comparison         | No. of Trials | Change in SBP, mmHg<br>WMD (95%CI) |
|--------------------|---------------|------------------------------------|
| CANA vs. PLC       | 2             | -3.52 (-8.74, 1.70)                |
| DAPA vs. PLC       | 1             | -4.5 (-7.54, -1.46)                |
| EMPA vs. PLC       | 2             | -4.41 (-5.96, -2.87)               |
| GLIM vs. PLC       | 1             | 0.51 (-3.08, 4.10)                 |
| SAX vs. PLC        | 2             | 0.64 (-1.86, 3.13)                 |
| SITA vs. PLC       | 4             | -2.11 (-3.90, -0.32) <sup>a</sup>  |
| CANA vs. GLIM      | 1             | -4.15 (-5.58, -2.72)               |
| CANA vs. SITA      | 2             | -2.44 (-3.77, -1.11)               |
| DAPA vs. GLIP      | 1             | -5.00 (-6.65, -3.35)               |
| EMPA vs. GLIM      | 1             | -5.8 (-7.03, -4.57)                |
| EMPA vs. LINA      | 1             | -3.56 (-5.76, -1.36)               |
| EMPA vs. SITA      | 1             | -4.65 (-8.22, -1.08)               |
| EMPA/LINA vs. EMPA | 1             | -0.29 (-2.07, 1.49)                |
| EMPA/LINA vs. LINA | 1             | -3.85 (-6.05, -1.65)               |
| EXEN vs. GLIM      | 1             | -3.10 (-5.00, -1.2)                |
| GLIM vs. LIRA      | 1             | 2.96 (1.12, 4.80)                  |
| GLIM vs. PIO       | 1             | 3.00 (-0.31, 6.31)                 |
| LIRA vs. SITA      | 2             | -1.29 (-4.33, 1.76)                |
| VILDA vs. SITA     | 1             | -2.00 (-8.53, 4.53)                |
