# Supplementary material for: Comparative Efficacy and Safety of Antidiabetic Drug Regimens Added to Metformin Monotherapy in Patients with Type 2 Diabetes: A Network Meta-Analysis
Source: PubMed Central journal article supplement (PMC4412636; doi:10.1371/journal.pone.0125879), 2015-04-28
Supplement: pone.0125879.s022.pdf [file pone.0125879.s022.pdf]

**Table S5. Results of Traditional Meta-Analysis Comparing Antidiabetic Therapies Effect on Experiencing Confirmed Hypoglycemia**

| Comparison         | No. of Trials | Relative Risk (95%CI) |
|--------------------|---------------|-----------------------|
| ACA vs. PLC        | 1             | 0.51 (0.05, 5.47)     |
| ALO vs. PLC        | 1             | 0.16 (0.03, 0.97)     |
| CANA vs. PLC       | 2             | 1.55 (0.43, 5.62)     |
| DAPA vs. PLC       | 2             | 1.50 (0.54, 4.18)     |
| EMPA vs. PLC       | 1             | 3.45 (0.43, 27.86)    |
| EXEN vs. PLC       | 1             | 0.93 (0.35, 2.45)     |
| GLIM v PLC         | 2             | 2.19 (0.42, 11.50)    |
| GLIP vs. PLC       | 1             | 4.5 (1.01, 19.98)     |
| LINA vs. PLC       | 2             | 0.30 (0.09, 0.97)     |
| LIRA vs. PLC       | 1             | 0.88 (0.31, 2.51)     |
| LIX vs. PLC        | 1             | 3.48 (0.43, 28.03)    |
| NAT vs. PLC        | 1             | 2.41 (0.28, 20.47)    |
| REP vs. PLC        | 1             | 19.00 (1.16, 310.66)  |
| ROSI vs. PLC       | 2             | 1.35 (0.37, 4.90)     |
| SAXA vs. PLC       | 2             | 0.68 (0.10, 4.61)     |
| SITA vs. PLC       | 5             | 1.19 (0.31, 4.56)     |
| VILDA vs. PLC      | 4             | 1.79 (0.43, 7.45)     |
| CANA vs. GLIM      | 1             | 0.15 (0.11, 0.20)     |
| CANA vs. SITA      | 1             | 17.44 (1.05, 289.20)  |
| DAPA vs. GLIP      | 1             | 0.05 (0.02, 0.10)     |
| EMPA vs. GLIM      | 1             | 0.08 (0.04, 0.14)     |
| EMPA vs. LINA      | 1             | 1.41 (0.29, 6.89)     |
| EMPA vs. SITA      | 1             | 0.10 (0.00, 2.08)     |
| EMPA/LINA vs. EMPA | 1             | 0.44 (0.13, 1.54)     |
| EMPA/LINA vs. LINA | 1             | 0.97 (0.18, 5.21)     |
| EXEN vs. GLIM      | 1             | 0.49 (0.43, 0.57)     |
| EXEN vs. LIX       | 1             | 3.14 (1.44, 6.87)     |
| GLAR vs. SITA      | 1             | 5.2 (2.86, 9.46)      |
| GLIC vs. NAT       | 1             | 1.03 (0.65, 1.64)     |
| GLIC vs. PIO       | 1             | 8.86 (3.18, 24.64)    |
| GLIC vs. ROSI      | 1             | 20.51 (2.78, 151.51)  |
| GLIM vs. LINA      | 1             | 6.08 (4.44, 8.33)     |
| GLIM vs. LIRA      | 1             | 5.84 (3.52, 9.68)     |
| GLIM vs. PIO       | 1             | 2.57 (0.51, 13.03)    |
| GLIM vs. SITA      | 1             | 3.15 (2.21, 4.50)     |
| GLIM vs. VILD      | 1             | 9.78 (6.41, 14.93)    |
| GLIP vs. SAXA      | 1             | 76.64 (4.72, ??)      |
| GLIP vs. SITA      | 1             | 6.49 (4.47, 9.44)     |
| LIRA vs. SITA      | 2             | 0.61 (0.18, 2.04)     |
| ROSI vs. SITA      | 1             | 1.08 (0.07, 17.01)    |
| SAXA vs. SITA      | 1             | 1.14 (0.52, 2.52)     |
