# Supplementary material for: Comparative Efficacy and Safety of Antidiabetic Drug Regimens Added to Metformin Monotherapy in Patients with Type 2 Diabetes: A Network Meta-Analysis
Source: PubMed Central journal article supplement (PMC4412636; doi:10.1371/journal.pone.0125879), 2015-04-28
Supplement: pone.0125879.s023.pdf [file pone.0125879.s023.pdf]

**Table S6. Results of Traditional Meta-Analysis Comparing Antidiabetic Therapies Effect on Experiencing Urinary Tract Infections**

| Comparison         | No. of Trials | Relative Risk (95%CI) |
|--------------------|---------------|-----------------------|
| ALO vs. PLC        | 2             | 1.05 (0.51, 2.15)     |
| ALO/PIO vs. PLC    | 1             | 0.80 (0.34, 1.89)     |
| CANA vs. PLC       | 2             | 1.38 (0.18, 10.90)    |
| DAPA vs. PLC       | 1             | 0.96 (0.48, 1.93)     |
| EMPA vs. PLC       | 2             | 1.20 (0.63, 2.32)     |
| LINA vs. PLC       | 1             | 0.77 (0.32, 1.85)     |
| SAX vs. PLC        | 2             | 1.37 (0.76, 2.46)     |
| SITA vs. PLC       | 5             | 1.02 (0.51, 2.01)     |
| PIO vs. PLC        | 1             | 1.25 (0.5, 3.15)      |
| VILDA vs. PLC      | 2             | 1.11 (0.06, 19.52)    |
| ALO vs. PIO        | 1             | 0.74 (0.34, 1.56)     |
| ALO vs. ALO/PIO    | 1             | 1.15 (0.58, 2.27)     |
| ALO/PIO vs. PIO    | 1             | 0.64 (0.35, 1.17)     |
| CANA vs. SITA      | 2             | 1.34 (0.71, 2.50)     |
| CANA vs. GLIM      | 1             | 1.41 (0.88, 2.27)     |
| DAPA vs. GLIM      | 1             | 1.77 (0.99, 3.16)     |
| EMPA vs. EMPA/LINA | 1             | 1.20 (0.67, 2.22)     |
| EMPA vs. GLIM      | 1             | 0.98 (0.75, 1.27)     |
| EMPA vs. LINA      | 1             | 0.62 (0.33, 1.14)     |
| EMPA vs. SITA      | 1             | 1.17 (0.31, 4.41)     |
| EMPA/LINA vs. LINA | 1             | 0.51 (0.27, 0.98)     |
| GLIP vs. SITA      | 1             | 0.57 (0.35, 0.97)     |
| GLIM vs. LINA      | 1             | 1.04 (0.71, 1.52)     |
| SAX vs. SITA       | 1             | 1.08 (0.61, 1.92)     |
