# Supplementary material for: Comparative Efficacy and Safety of Antidiabetic Drug Regimens Added to Metformin Monotherapy in Patients with Type 2 Diabetes: A Network Meta-Analysis
Source: PubMed Central journal article supplement (PMC4412636; doi:10.1371/journal.pone.0125879), 2015-04-28
Supplement: pone.0125879.s024.pdf [file pone.0125879.s024.pdf]

**Table S7. Results of Traditional Meta-Analysis Comparing Antidiabetic Therapies Effect on Experiencing Genital Tract Infections**

| Comparison         | No. of Trials | Relative Risk (95%CI) |
|--------------------|---------------|-----------------------|
| CANA vs. PLC       | 2             | 5.85 (1.39, 24.65)    |
| DAPA vs. PLC       | 1             | 2.16 (0.97, 4.79)     |
| EMPA vs. PLC       | 2             | 11.70 (1.59, 86.34)   |
| SITA vs. PLC       | 3             | 2.27 (0.52, 9.90)     |
| CANA vs. GLIM      | 1             | 6.04 (2.96, 12.31)    |
| CANA vs. SITA      | 2             | 3.97 (1.71, 9.22)     |
| DAPA vs. GLIP      | 1             | 4.57 (2.41, 8.65)     |
| EMPA vs. EMPA/LINA | 1             | 2.31 (1.03, 5.18)     |
| EMPA vs. GLIM      | 1             | 5.40 (3.25, 8.98)     |
| EMPA vs. LINA      | 1             | 8.93 (1.21, 65.96)    |
| EMPA vs. SITA      | 1             | 1.76 (0.38, 8.27)     |
| EMPA/LINA vs. LINA | 1             | 3.87 (0.49, 30.61)    |
