# Supplementary material for: Comparative Efficacy and Safety of Antidiabetic Drug Regimens Added to Metformin Monotherapy in Patients with Type 2 Diabetes: A Network Meta-Analysis
Source: PLoS One. 2015 Apr 28;10(4):e0125879. doi: 10.1371/journal.pone.0125879 (PMC4412636; doi:10.1371/journal.pone.0125879)
Supplement: S3 Fig — Therapies are reported in alphabetical order. HbA1c results are reported in WMD, % (95% CI). Results for changes in HbA1c on the top portion of the matrix represent changes in the row-defining treatment vs. those in the column-defining treatment (referent). For changes in HbA1c, negative values favor the first agent in alphabetical order. Statistically significant results are bolded. Clinically superior results are underlined. Sodium glucose co-transporter-2 (SGLT-2) inhibitors are highlighted. The results on the bottom portion of the matrix represent the reciprocal of the top portion. ACA = acarbose; ALO = alogliptin; ALO/PIO = alogliptin/pioglitazone; CANA = canagliflozin; COL = colesevelam; DAPA = dapagliflozin; EMPA = empagliflozin; EMPA/LINA = empagliflozin/linagliptin; EXEN = exenatide; GLAR = glargine; GLIB = glibenclamide; GLIC = gliclazide; GLIM = glimepiride; GLIP = glipizide; HbA1c = hemoglobin A1c; LINA = linagliptin; LIRA = liraglutide; LIX = lixisenatide; MIG = miglitol; NAT = nateglinide; PIO = pioglitazone; PLC = placebo; REP = repaglinide; ROSI = rosiglitazone; SAX = saxagliptin; SITA = sitagliptin; VILDA = vildagliptin. (PDF) [file pone.0125879.s006.pdf]

Figure S3. Network Meta-Analysis Results of the Effect of Antidiabetic Therapies on Change in HbA1c From Baseline

|                        |                        |                      |                        |                        |                        |                        |                      |                        |                       |                      |                         |                        |                        |                        |                        |                        |                        |                        |                        |                        |                       |                        |                        |                        |                        |
|------------------------|------------------------|----------------------|------------------------|------------------------|------------------------|------------------------|----------------------|------------------------|-----------------------|----------------------|-------------------------|------------------------|------------------------|------------------------|------------------------|------------------------|------------------------|------------------------|------------------------|------------------------|-----------------------|------------------------|------------------------|------------------------|------------------------|
| ACA                    | -0.21<br>(-0.57,0.15)  | 0.45<br>(0.08,0.82)  | -0.07<br>(-0.4,0.26)   | -0.29<br>(-0.76,0.18)  | -0.31<br>(-0.65,0.03)  | -0.1<br>(-0.43,0.23)   | 0.34<br>(-0.03,0.72) | 0.01<br>(-0.32,0.34)   | 0.45<br>(0.04,0.85)   | 0.5<br>(-0.15,1.15)  | -0.08<br>(-0.42,0.26)   | -0.06<br>(-0.38,0.26)  | -0.23<br>(-0.57,0.1)   | -0.14<br>(-0.47,0.19)  | 0.07<br>(-0.27,0.41)   | -0.22<br>(-0.59,0.14)  | -0.36<br>(-0.81,0.09)  | -0.3<br>(-0.66,0.06)   | -0.1<br>(-0.43,0.24)   | -0.79<br>(-1.09,-0.48) | 0.29<br>(-0.44,1.03)  | -0.03<br>(-0.38,0.31)  | -0.28<br>(-0.61,0.05)  | -0.14<br>(-0.46,0.17)  | -0.16<br>(-0.48,0.16)  |
| 0.21<br>(-0.15,0.57)   | ALO                    | 0.66<br>(0.44,0.89)  | 0.15<br>(-0.08,0.37)   | -0.08<br>(-0.48,0.32)  | -0.09<br>(-0.33,0.15)  | 0.11<br>(-0.11,0.34)   | 0.56<br>(0.27,0.84)  | 0.23<br>(0,0.45)       | 0.66<br>(0.34,0.98)   | 0.71<br>(-0.03,1.46) | 0.13<br>(-0.1,0.36)     | 0.16<br>(-0.05,0.36)   | -0.02<br>(-0.25,0.21)  | 0.07<br>(-0.16,0.3)    | 0.29<br>(0.05,0.52)    | -0.01<br>(-0.28,0.26)  | -0.14<br>(-0.52,0.24)  | -0.09<br>(-0.36,0.18)  | 0.12<br>(-0.08,0.32)   | -0.57<br>(-0.76,-0.38) | 0.51<br>(-0.19,1.21)  | 0.18<br>(-0.06,0.42)   | -0.07<br>(-0.29,0.16)  | 0.07<br>(-0.13,0.27)   | 0.05<br>(-0.16,0.26)   |
| -0.45<br>(-0.82,-0.08) | -0.66<br>(-0.89,-0.44) | ALO/PIO              | -0.52<br>(-0.76,-0.28) | -0.74<br>(-1.15,-0.33) | -0.76<br>(-1.01,-0.5)  | -0.55<br>(-0.79,-0.31) | -0.11<br>(-0.4,0.19) | -0.44<br>(-0.68,-0.19) | -0.01<br>(-0.34,0.33) | 0.05<br>(-0.7,0.8)   | -0.53<br>(-0.78,-0.29)  | -0.51<br>(-0.73,-0.29) | -0.69<br>(-0.93,-0.44) | -0.59<br>(-0.84,-0.35) | -0.38<br>(-0.63,-0.13) | -0.67<br>(-0.96,-0.39) | -0.81<br>(-1.2,-0.42)  | -0.75<br>(-1.03,-0.47) | -0.55<br>(-0.75,-0.34) | -1.24<br>(-1.45,-1.02) | -0.16<br>(-0.86,0.55) | -0.49<br>(-0.74,-0.23) | -0.73<br>(-0.97,-0.49) | -0.6<br>(-0.81,-0.38)  | -0.61<br>(-0.84,-0.38) |
| 0.07<br>(-0.26,0.4)    | -0.15<br>(-0.37,0.08)  | 0.28,0.74            | CANA                   | 0.52<br>(-0.59,0.15)   | -0.22<br>(-0.43,-0.05) | -0.24<br>(-0.2,0.13)   | 0.41<br>(0.17,0.65)  | 0.08<br>(-0.09,0.25)   | 0.51<br>(0.23,0.79)   | 0.57<br>(-0.17,1.3)  | -0.02<br>(-0.12,0.14)   | 0.01<br>(-0.25,0.09)   | -0.17<br>(-0.34,0.01)  | -0.08<br>(-0.25,0.09)  | 0.14<br>(-0.04,0.32)   | -0.16<br>(-0.39,0.07)  | -0.29<br>(-0.64,0.06)  | -0.24<br>(-0.46,-0.01) | -0.03<br>(-0.21,0.15)  | -0.72<br>(-0.85,-0.59) | 0.36<br>(-0.32,1.04)  | 0.03<br>(-0.16,0.22)   | -0.21<br>(-0.38,-0.05) | -0.08<br>(-0.2,0.05)   | -0.09<br>(-0.24,0.06)  |
| 0.29<br>(-0.18,0.76)   | 0.08<br>(-0.32,0.48)   | 0.74<br>(0.33,1.15)  | 0.22<br>(-0.15,0.59)   | COL                    | 0.22<br>(-0.4,0.36)    | 0.19<br>(-0.18,0.56)   | 0.63<br>(0.22,1.05)  | 0.3<br>(-0.07,0.68)    | 0.74<br>(0.3,1.17)    | 0.79<br>(-0.01,1.59) | 0.21<br>(-0.16,0.57)    | 0.23<br>(-0.13,0.59)   | 0.05<br>(-0.32,0.43)   | 0.15<br>(-0.23,0.52)   | 0.36<br>(-0.01,0.74)   | 0.07<br>(-0.34,0.47)   | -0.07<br>(-0.55,0.42)  | -0.01<br>(-0.44,0.38)  | 0.19<br>(-0.18,0.57)   | -0.5<br>(-0.85,-0.14)  | 0.58<br>(-0.18,1.34)  | 0.25<br>(-0.1,0.61)    | 0.01<br>(-0.36,0.38)   | 0.15<br>(-0.21,0.5)    | 0.13<br>(-0.23,0.49)   |
| 0.31<br>(-0.03,0.65)   | 0.09<br>(-0.15,0.33)   | 0.76<br>(0.5,1.01)   | 0.24<br>(0.05,0.43)    | 0.02<br>(-0.36,0.4)    | DAPA                   | 0.21<br>(0.02,0.39)    | 0.65<br>(0.39,0.91)  | 0.32<br>(0.13,0.51)    | 0.75<br>(0.46,1.05)   | 0.81<br>(0.07,1.54)  | 0.22<br>(0.02,0.43)     | 0.25<br>(0.08,0.42)    | 0.07<br>(-0.09,0.23)   | 0.16<br>(-0.03,0.36)   | 0.38<br>(0.18,0.58)    | 0.08<br>(-0.16,0.33)   | -0.05<br>(-0.41,0.31)  | 0<br>(-0.24,0.24)      | 0.21<br>(0.01,0.41)    | -0.48<br>(-0.62,-0.33) | 0.6<br>(-0.09,1.29)   | 0.27<br>(0.07,0.48)    | 0.03<br>(-0.15,0.2)    | 0.16<br>(0.01,0.32)    | 0.15<br>(-0.03,0.32)   |
| 0.1<br>(-0.23,0.43)    | -0.11<br>(-0.34,0.11)  | 0.55<br>(0.31,0.79)  | 0.03<br>(-0.13,0.2)    | -0.19<br>(-0.56,0.18)  | -0.21<br>(-0.39,-0.02) | EMPA                   | 0.44<br>(0.24,0.64)  | 0.11<br>(-0.06,0.28)   | 0.54<br>(0.26,0.83)   | 0.6<br>(-0.13,1.33)  | 0.02<br>(-0.17,0.2)     | 0.04<br>(-0.08,0.16)   | -0.14<br>(-0.31,0.04)  | -0.04<br>(-0.19,0.1)   | 0.17<br>(-0.01,0.35)   | -0.12<br>(-0.35,0.1)   | -0.26<br>(-0.61,0.09)  | -0.2<br>(-0.43,0.02)   | 0.0<br>(-0.17,0.18)    | -0.69<br>(-0.81,-0.57) | 0.39<br>(-0.29,1.07)  | 0.06<br>(-0.12,0.25)   | -0.18<br>(-0.34,-0.02) | -0.05<br>(-0.17,0.08)  | -0.06<br>(-0.21,0.08)  |
| -0.34<br>(-0.72,0.03)  | -0.56<br>(-0.84,-0.27) | 0.11<br>(-0.19,0.4)  | -0.41<br>(-0.65,-0.17) | -0.63<br>(-1.05,-0.22) | -0.65<br>(-0.91,-0.39) | -0.44<br>(-0.64,-0.24) | EMPA/LINA            | -0.33<br>(-0.58,-0.09) | 0.1<br>(-0.23,0.44)   | 0.16<br>(-0.5,0.91)  | -0.43<br>(-0.68,-0.17)  | -0.58<br>(-0.62,-0.19) | -0.49<br>(-0.83,-0.33) | -0.27<br>(-0.69,-0.28) | -0.52<br>(-0.86,-0.18) | -0.27<br>(-0.86,-0.28) | -0.65<br>(-1.09,0.09)  | -0.44<br>(-0.93,-0.36) | -0.69<br>(-1.34,-0.04) | -1.13<br>(-1.34,-0.92) | -0.05<br>(-0.76,0.65) | -0.38<br>(-0.64,-0.12) | -0.62<br>(-0.86,-0.38) | -0.49<br>(-0.71,-0.27) | -0.5<br>(-0.73,-0.28)  |
| -0.01<br>(-0.34,0.32)  | -0.23<br>(-0.45,0)     | 0.44<br>(0.19,0.68)  | -0.08<br>(-0.25,0.09)  | -0.3<br>(-0.68,0.07)   | -0.32<br>(-0.51,-0.13) | -0.11<br>(-0.28,0.06)  | 0.33<br>(0.09,0.58)  | EXEN                   | 0.43<br>(0.14,0.72)   | 0.49<br>(-0.24,1.22) | -0.1<br>(-0.29,0.09)    | -0.07<br>(-0.21,0.07)  | -0.25<br>(-0.43,-0.07) | -0.15<br>(-0.33,0.02)  | 0.06<br>(-0.13,0.25)   | -0.37<br>(-0.42,-0.05) | -0.32<br>(-0.72,-0.02) | -0.11<br>(-0.54,-0.09) | -0.28<br>(-0.29,0.07)  | -0.98<br>(-0.92,-0.67) | 0.28<br>(-0.4,0.96)   | -0.05<br>(-0.24,0.15)  | -0.29<br>(-0.46,-0.12) | -0.16<br>(-0.3,-0.02)  | -0.17<br>(-0.33,-0.02) |
| -0.45<br>(-0.85,-0.04) | -0.66<br>(-0.98,-0.34) | 0.01<br>(-0.33,0.34) | -0.51<br>(-0.79,-0.23) | -0.74<br>(-1.17,-0.3)  | -0.75<br>(-1.05,-0.46) | -0.54<br>(-0.83,-0.26) | -0.1<br>(-0.44,0.23) | -0.43<br>(-0.72,-0.14) | GLAR                  | 0.05<br>(-0.71,0.82) | -0.53<br>(-0.82,-0.23)  | -0.5<br>(-0.77,-0.23)  | -0.68<br>(-0.97,-0.39) | -0.59<br>(-0.88,-0.3)  | -0.37<br>(-0.66,-0.08) | -0.67<br>(-1,-0.34)    | -0.88<br>(-1.22,-0.38) | -0.75<br>(-1.07,-0.43) | -0.54<br>(-0.83,-0.25) | -1.23<br>(-1.49,-0.97) | -0.15<br>(-0.87,0.57) | -0.48<br>(-0.77,-0.19) | -0.72<br>(-0.84,-0.34) | -0.61<br>(-0.84,-0.33) |                        |
| -0.5<br>(-1.15,0.15)   | -0.71<br>(-1.46,0.03)  | -0.05<br>(-0.8,0.7)  | -0.57<br>(-1.3,0.17)   | -0.79<br>(-1.59,0.01)  | -0.81<br>(-1.54,-0.07) | -0.6<br>(-1.33,0.13)   | -0.16<br>(-0.91,0.6) | -0.49<br>(-1.22,0.24)  | -0.05<br>(-0.82,0.71) | GLIB                 | -0.58<br>(-1.32,0.15)   | -0.56<br>(-1.28,0.17)  | -0.73<br>(-1.47,0)     | -0.64<br>(-1.37,0.09)  | -0.43<br>(-1.16,0.31)  | -0.72<br>(-1.47,0.02)  | -0.86<br>(-1.65,-0.06) | -0.8<br>(-1.55,-0.06)  | -0.6<br>(-1.33,0.14)   | -1.29<br>(-2.01,-0.56) | -0.21<br>(-1.19,0.78) | -0.53<br>(-1.27,0.2)   | -0.78<br>(-1.51,-0.05) | -0.64<br>(-1.37,0.08)  | -0.66<br>(-1.39,0.07)  |
| 0.08<br>(-0.26,0.42)   | -0.13<br>(-0.36,0.1)   | 0.53<br>(0.29,0.78)  | 0.02<br>(-0.17,0.2)    | -0.01<br>(-0.57,0.16)  | -0.22<br>(-0.43,-0.02) | -0.02<br>(-0.2,0.17)   | 0.43<br>(0.17,0.68)  | 0.1<br>(-0.09,0.29)    | 0.53<br>(0.23,0.82)   | 0.58<br>(-0.15,1.32) | 0.03<br>(-0.13,0.19)    | -0.4<br>(-0.35,0.04)   | -0.27<br>(-0.25,0.13)  | -0.06<br>(-0.04,0.36)  | -0.14<br>(-0.38,0.1)   | -0.27<br>(-0.63,0.09)  | -0.14<br>(-0.42,-0.02) | -0.01<br>(-0.18,0.15)  | -0.22<br>(-0.85,-0.56) | -0.38<br>(-0.31,1.06)  | 0.05<br>(-0.11,0.21)  | -0.19<br>(-0.38,-0.02) | -0.06<br>(-0.21,0.09)  | -0.08<br>(-0.23,0.08)  |                        |
| 0.06<br>(-0.26,0.38)   | -0.16<br>(-0.36,0.05)  | 0.51<br>(0.29,0.73)  | -0.01<br>(-0.14,0.12)  | -0.23<br>(-0.59,0.13)  | -0.25<br>(-0.42,-0.08) | -0.16<br>(-0.16,0.08)  | 0.4<br>(0.19,0.62)   | 0.07<br>(-0.07,0.21)   | 0.5<br>(0.23,0.77)    | 0.56<br>(-0.17,1.28) | -0.03<br>(-0.19,0.13)   | GLIM                   | -0.18<br>(-0.33,-0.02) | -0.08<br>(-0.21,0.04)  | 0.13<br>(-0.02,0.28)   | -0.17<br>(-0.37,0.04)  | -0.04<br>(-0.64,0.04)  | -0.25<br>(-0.45,-0.04) | -0.04<br>(-0.18,0.11)  | -0.73<br>(-0.82,-0.64) | 0.35<br>(-0.33,1.03)  | 0.02<br>(-0.14,0.19)   | -0.22<br>(-0.36,-0.08) | -0.09<br>(-0.18,0.01)  | -0.1<br>(-0.21,0)      |
| 0.23<br>(-0.1,0.57)    | 0.02<br>(-0.2,0.25)    | 0.69<br>(0.44,0.93)  | 0.17<br>(-0.01,0.34)   | -0.05<br>(-0.43,0.32)  | -0.07<br>(-0.23,0.09)  | 0.14<br>(-0.04,0.31)   | 0.58<br>(0.33,0.83)  | 0.25<br>(0.07,0.43)    | 0.68<br>(0.39,0.97)   | 0.73<br>(0.1,1.47)   | 0.15<br>(-0.04,0.35)    | 0.18<br>(-0.02,0.33)   | GLIP                   | 0.09<br>(-0.09,0.27)   | 0.31<br>(0.12,0.5)     | 0.01<br>(-0.22,0.25)   | -0.12<br>(-0.48,0.23)  | -0.07<br>(-0.3,0.16)   | 0.14<br>(-0.05,0.32)   | -0.55<br>(-0.68,-0.42) | 0.53<br>(-0.16,1.21)  | 0.2<br>(0,0.4)         | -0.04<br>(-0.19,0.1)   | 0.09<br>(-0.04,0.22)   | 0.07<br>(-0.09,0.24)   |
| 0.14<br>(-0.19,0.47)   | -0.07<br>(-0.3,0.16)   | 0.59<br>(0.35,0.84)  | 0.08<br>(-0.09,0.25)   | -0.15<br>(-0.52,0.23)  | -0.16<br>(-0.36,0.03)  | 0.04<br>(-0.1,0.19)    | 0.49<br>(0.28,0.69)  | 0.15<br>(-0.02,0.33)   | 0.59<br>(0.3,0.88)    | 0.64<br>(-0.09,1.37) | 0.06<br>(-0.13,0.25)    | 0.08<br>(-0.04,0.21)   | -0.09<br>(-0.27,0.09)  | LINA                   | 0.22<br>(0.03,0.4)     | -0.08<br>(-0.31,0.15)  | -0.21<br>(-0.57,0.14)  | -0.16<br>(-0.39,0.07)  | 0.05<br>(-0.13,0.23)   | -0.64<br>(-0.77,-0.52) | 0.44<br>(-0.25,1.12)  | 0.11<br>(-0.09,0.3)    | -0.14<br>(-0.31,0.03)  | 0<br>(-0.14,0.14)      | -0.02<br>(-0.17,0.13)  |
| -0.07<br>(-0.41,0.27)  | -0.29<br>(-0.52,-0.05) | 0.38<br>(0.13,0.63)  | -0.14<br>(-0.32,0.04)  | -0.36<br>(-0.74,0.01)  | -0.38<br>(-0.58,-0.18) | -0.17<br>(-0.35,0.01)  | 0.27<br>(0.02,0.52)  | -0.06<br>(-0.25,0.13)  | 0.37<br>(0.08,0.66)   | 0.43<br>(-0.31,1.16) | -0.16<br>(-0.36,0.04)   | -0.13<br>(-0.28,0.02)  | -0.31<br>(-0.5,-0.12)  | -0.22<br>(-0.4,-0.03)  | LIRA                   | -0.3<br>(-0.54,-0.05)  | -0.43<br>(-0.79,-0.07) | -0.38<br>(-0.61,-0.14) | -0.36<br>(-0.36,0.02)  | -0.86<br>(-1,-0.71)    | 0.22<br>(-0.47,0.91)  | -0.11<br>(-0.31,0.09)  | -0.35<br>(-0.53,-0.17) | -0.22<br>(-0.36,-0.08) | -0.23<br>(-0.4,-0.07)  |
| 0.22<br>(-0.14,0.59)   | 0.01<br>(-0.26,0.28)   | 0.67<br>(0.39,0.96)  | 0.16<br>(-0.07,0.39)   | -0.07<br>(-0.47,0.34)  | -0.08<br>(-0.33,0.16)  | 0.12<br>(-0.1,0.35)    | 0.57<br>(0.28,0.86)  | 0.24<br>(0.05,0.42)    | 0.67<br>(0.34,1)      | 0.72<br>(-0.02,1.47) | 0.14<br>(-0.1,0.38)     | 0.17<br>(-0.04,0.37)   | -0.01<br>(-0.25,0.22)  | 0.08<br>(-0.15,0.31)   | 0.03<br>(0.05,0.54)    | LIX                    | -0.13<br>(-0.52,0.25)  | -0.08<br>(-0.35,0.19)  | 0.13<br>(-0.11,0.37)   | -0.56<br>(-0.76,-0.37) | 0.52<br>(-0.18,1.22)  | 0.19<br>(-0.06,0.43)   | -0.06<br>(-0.28,0.17)  | 0.08<br>(-0.13,0.29)   | 0.06<br>(-0.15,0.28)   |
| 0.36<br>(-0.09,0.81)   | 0.14<br>(-0.24,0.52)   | 0.81<br>(0.42,1.2)   | 0.29<br>(-0.06,0.64)   | 0.07<br>(-0.42,0.55)   | 0.05<br>(-0.31,0.41)   | 0.26<br>(-0.09,0.61)   | 0.7<br>(0.31,1.09)   | 0.37<br>(0.02,0.72)    | 0.8<br>(0.38,1.22)    | 0.86<br>(0.06,1.65)  | 0.27<br>(-0.09,0.63)    | 0.3<br>(-0.04,0.64)    | 0.12<br>(-0.23,0.48)   | 0.21<br>(-0.14,0.57)   | 0.43<br>(0.07,0.79)    | 0.13<br>(-0.25,0.52)   | MIG                    | 0.05<br>(-0.33,0.43)   | 0.26<br>(-0.1,0.62)    | -0.43<br>(-0.76,-0.1)  | 0.65<br>(-0.1,1.4)    | 0.32<br>(-0.04,0.68)   | 0.08<br>(-0.27,0.42)   | -0.12<br>(-0.12,0.55)  | 0.2<br>(-0.15,0.54)    |
| 0.3<br>(-0.06,0.66)    | 0.09<br>(-0.18,0.36)   | 0.75<br>(0.47,1.03)  | 0.24<br>(0.01,0.46)    | 0.01<br>(-0.38,0.41)   | 0<br>(-0.24,0.24)      | 0.2<br>(-0.02,0.43)    | 0.65<br>(0.36,0.93)  | 0.32<br>(0.09,0.54)    | 0.75<br>(0.43,1.07)   | 0.8<br>(0.06,1.55)   | 0.22<br>(0.02,0.42)     | 0.25<br>(0.04,0.45)    | 0.07<br>(-0.16,0.3)    | 0.16<br>(-0.07,0.39)   | 0.38<br>(0.14,0.61)    | 0.08<br>(-0.19,0.35)   | -0.05<br>(-0.43,0.33)  | NAT                    | 0.21<br>(-0.02,0.43)   | -0.48<br>(-0.67,-0.29) | 0.6<br>(-0.1,1.3)     | 0.27<br>(0.04,0.49)    | 0.02<br>(-0.2,0.25)    | 0.16<br>(-0.04,0.36)   | 0.14<br>(-0.07,0.35)   |
| 0.1<br>(-0.24,0.43)    | -0.12<br>(-0.32,0.08)  | 0.55<br>(0.34,0.75)  | 0.03<br>(-0.15,0.21)   | -0.21<br>(-0.57,0.18)  | -0.22<br>(-0.41,-0.01) | -0.18<br>(-0.18,0.17)  | 0.44<br>(0.19,0.69)  | 0.11<br>(-0.07,0.29)   | 0.54<br>(0.25,0.83)   | 0.6<br>(-0.14,1.33)  | 0.01<br>(-0.15,0.18)    | 0.04<br>(-0.11,0.18)   | -0.05<br>(-0.32,0.05)  | -0.17<br>(-0.23,0.13)  | -0.13<br>(-0.02,0.36)  | -0.37<br>(-0.37,0.11)  | -0.26<br>(-0.62,0.1)   | -0.21<br>(-0.43,0.02)  | PIO                    | -0.69<br>(-0.83,-0.55) | 0.39<br>(-0.3,1.08)   | 0.06<br>(-0.13,0.25)   | -0.18<br>(-0.36,-0.01) | -0.05<br>(-0.19,0.09)  | -0.06<br>(-0.22,0.09)  |
| 0.79<br>(0.48,1.09)    | 0.57<br>(0.38,0.76)    | 1.24<br>(1.02,1.45)  | 0.72<br>(0.59,0.85)    | 0.5<br>(0.14,0.85)     | 0.48<br>(0.33,0.62)    | 0.69<br>(0.57,0.81)    | 1.13<br>(0.92,1.34)  | 0.8<br>(0.67,0.92)     | 1.23<br>(0.97,1.49)   | 1.29<br>(0.56,2.01)  | 0.7<br>(0.52,0.85)      | 0.73<br>(0.46,0.82)    | 0.55<br>(0.42,0.68)    | 0.64<br>(0.52,0.77)    | 0.86<br>(0.71,1)       | 0.56<br>(0.37,0.76)    | 0.43<br>(0.1,0.76)     | 0.48<br>(0.29,0.67)    | 0.69<br>(0.55,0.83)    | PLC                    | 1.08<br>(0.41,1.75)   | 0.75<br>(0.6,0.9)      | 0.51<br>(0.39,0.62)    | 0.64<br>(0.57,0.71)    | 0.63<br>(0.53,0.72)    |
| -0.29<br>(-1.03,0.44)  | -0.51<br>(-1.21,0.19)  | 0.16<br>(-0.55,0.86) | -0.36<br>(-1.04,0.32)  | -0.58<br>(-1.34,0.18)  | -0.6<br>(-1.29,0.09)   | -0.37<br>(-0.79,0.29)  | 0.05<br>(-0.65,0.76) | -0.28<br>(-0.96,0.4)   | 0.15<br>(-0.57,0.87)  | 0.21<br>(-0.78,1.19) | -0.38<br>(-1.06,0.31)   | -0.35<br>(-1.03,0.33)  | -0.53<br>(-1.21,0.16)  | -0.44<br>(-1.12,0.25)  | -0.22<br>(-0.91,0.47)  | -0.52<br>(-1.22,0.18)  | -0.65<br>(-1.4,0.1)    | -0.6<br>(-1.3,0.1)     | -0.39<br>(-1.08,0.3)   | -1.08<br>(-1.75,-0.41) | REP                   | -0.33<br>(-1.02,0.36)  | -0.57<br>(-1.25,0.11)  | -0.44<br>(-1.11,0.24)  | -0.45<br>(-1.13,0.22)  |
| 0.03<br>(-0.31,0.38)   | -0.18<br>(-0.42,0.06)  | 0.49<br>(0.23,0.74)  | -0.03<br>(-0.22,0.16)  | -0.25<br>(-0.61,-0.1)  | -0.27<br>(-0.48,-0.07) | -0.06<br>(-0.25,0.12)  | 0.38<br>(0.12,0.64)  | 0.05<br>(-0.15,0.24)   | 0.48<br>(0.19,0.77)   | 0.53<br>(-0.21,27)   | -0.05<br>(-0.19,0.14)</ |                        |                        |                        |                        |                        |                        |                        |                        |                        |                       |                        |                        |                        |                        |
